# Supplementary material
Source: PubMed Central journal article supplement (PMC7311060)
Supplement: jo9b03119_si_001.pdf [file jo9b03119_si_001.pdf]

## Supporting Information

### **Structure-property relationships in unsymmetric bis(antiaromatics): Who wins the battle between pentalene and benzocyclobutadiene?**

Péter J. Mayer,<sup>1,2</sup> Ouissam El Bakouri,<sup>3</sup> Tamás Holczbauer,<sup>4</sup> Gergely F. Samu<sup>5</sup>, Csaba

Janáky<sup>5</sup>, Henrik Ottosson\*<sup>3</sup>, Gábor London\*<sup>1</sup>

<sup>1</sup> MTA-TTK “Lendület” Functional Organic Materials Research Group, Institute of Organic Chemistry, Research Centre for Natural Sciences, Hungarian Academy of Sciences, Magyar tudósok körútja 2., 1117 Budapest, Hungary

<sup>2</sup> Institute of Chemistry, University of Szeged, Rerrich Square 1, Szeged, H-6720, Hungary

<sup>3</sup> Department of Chemistry – Ångström Laboratory, Uppsala University, Box 530, 751 20, Uppsala, Sweden

<sup>4</sup> Institute of Organic Chemistry, Research Centre of Natural Sciences, Hungarian Academy of Sciences, Magyar tudósok körútja 2., 1117, Budapest, Hungary

<sup>5</sup> Department of Physical Chemistry and Materials Science, Interdisciplinary Excellence Centre, University of Szeged, Rerrich Square 1, Szeged, H-6720, Hungary

\* london.gabor@ttk.mta.hu; henrik.ottosson@kemi.uu.se.

## Table of contents

|                                                                                                                                                 |     |
|-------------------------------------------------------------------------------------------------------------------------------------------------|-----|
| S1 X-ray crystallography .....                                                                                                                  | S3  |
| S2 UV-Vis spectra of compound <b>9</b> and <b>14</b> in different solvents.....                                                                 | S10 |
| S3 Electrochemical measurements.....                                                                                                            | S11 |
| S4 Computational studies.....                                                                                                                   | S13 |
| S4.1 General methods .....                                                                                                                      | S13 |
| S4.2 Aromaticity analyses of the molecules and their conjugated cores .....                                                                     | S15 |
| S4.2.1 ACID plots .....                                                                                                                         | S15 |
| S4.2.2 NICS-XY scans and tables of HOMA values .....                                                                                            | S20 |
| S4.2.3 Electronic indices FLU and MCI.....                                                                                                      | S23 |
| S4.3 Aromaticity analyses (NICS-XY scan, HOMA, FLU and MCI) of subunits benzocyclobutadiene (BCB, <b>S1</b> ) and pentalene ( <b>S2</b> ) ..... | S24 |
| S4.4 Aromaticity analysis of subunits <b>S1</b> , <b>S2</b> , <b>S3</b> , <b>S4</b> , <b>S5</b> and <b>17'</b> .....                            | S26 |
| S4.5 Calculated SOMOs of the radical anion and cation of <b>9'</b> and <b>14'</b> .....                                                         | S28 |
| S4.6 Calculated LUMOs of <b>14</b> .....                                                                                                        | S29 |
| S4.7 Cartesian coordinates and absolute electronic energies.....                                                                                | S30 |
| S5 HRMS spectra .....                                                                                                                           | S42 |
| S6 NMR spectra .....                                                                                                                            | S48 |
| S7 References.....                                                                                                                              | S63 |

## S1 X-ray crystallography

### Crystal growth:

Compound **9** was dissolved in acetone, and the solvent was slowly evaporated. After a week red, chip crystals appeared. The thicker and opaque crystals were polycrystals. Smaller crystals were measured (0.2 x 0.2 x 0.1 mm).

Intensity data were collected on a Rigaku RAXIS-RAPID II diffractometer (using graphite monochromator; Mo-K $\alpha$  radiation,  $\lambda = 0.71075\text{\AA}$ ) at 123K in case of crystal **9**, at 123K. Crystals of compound **9** were measured with fiber loop with shine optic. Crystal Clear<sup>1</sup> (developed by Rigaku Company) software were used for data collection and refinement. Numerical absorption corrections<sup>2</sup> were applied to the data. The structures were solved by direct methods. Anisotropic full-matrix least-squares refinements were performed on  $F^2$  for all non-hydrogen atoms. Hydrogen atoms bonded to C atoms were placed in calculated positions and refined in a riding-model approximation. The computer programs used for the structure solution, refinement and analysis of the structures were Shelx<sup>3,4</sup>, Sir2014<sup>5</sup>, Wingx<sup>6</sup> and Platon<sup>7</sup>. Details of crystallographic data, data collection and refinement for crystal of **9** is collected in Table S1-3.

*Full Crystal data:* C<sub>37</sub>H<sub>24</sub>O, *Fwt.:* 484.56, deep red, chip, size: 0.20 x 0.20 x 0.10 mm, monoclinic, space group  $P 2_1/n$ ,  $a = 10.2162(16)\text{\AA}$ ,  $b = 14.533(3)\text{\AA}$ ,  $c = 16.867(3)\text{\AA}$ ,  $\alpha = 90^\circ$ ,  $\beta = 97.256(7)^\circ$ ,  $\gamma = 90^\circ$ ,  $V = 2484.2(7)\text{\AA}^3$ ,  $T = 123(2)\text{K}$ ,  $Z = 4$ ,  $F(000) = 1016$ ,  $D_x = 1.296\text{ Mg/m}^3$ ,  $\mu = 0.076\text{ mm}^{-1}$ .

A crystal of compound **9** was mounted on a fiber. Cell parameters were determined by least-squares using 18487 ( $3.06^\circ \leq \theta \leq 25.33^\circ$ ) reflections.

Intensity data were collected on a Rigaku R-AXIS-RAPID diffractometer (monochromator; Mo-K $\alpha$  radiation,  $\lambda = 0.71075\text{\AA}$ ) at 123(3) K in the range  $3.056^\circ \leq \theta \leq 18.845^\circ$ . A total of 18838 reflections were collected of which 1950 were unique [ $R(\text{int}) = 0.1630$ ,  $R(\sigma) = 0.0755$ ]; intensities of 1367 reflections were greater than  $2\sigma(I)$ . Completeness to  $\theta = 0.995$ .

A numerical absorption correction was applied to the data (the minimum and maximum transmission factors were 0.997982 and 0.999168).

The structure was solved by direct methods (and subsequent difference syntheses).

Anisotropic full-matrix least-squares refinement on  $F^2$  for all non-hydrogen atoms yielded  $R_1 = 0.0688$  and  $wR^2 = 0.1140$  for 1332 [ $I > 2\sigma(I)$ ] and  $R_1 = 0.1110$  and  $wR^2 = 0.1272$  for all (1950) intensity data, (number of parameters = 344, goodness-of-fit = 1.137, the maximum and mean shift/esd is 0.001 and 0.000).

The maximum and minimum residual electron density in the final difference map was 0.15 and -0.20 e.Å<sup>-3</sup>.

The weighting scheme applied was  $w = 1/[\sigma^2(F_o^2) + (0.03562 \cdot 2003P)^2 + 2.2003P]$  where  $P = (F_o^2 + 2F_c^2)/3$ .

Hydrogen atomic positions were calculated from assumed geometries. Hydrogen atoms were included in structure factor calculations, but they were not refined. The isotropic displacement parameters of the hydrogen atoms were approximated from the  $U(\text{eq})$  value of the atom they were bonded to.

Details of crystallographic data, data collection and refinement for crystal **9** is collected in Table S1-S3.

**Table S1.** Summary of crystallographic data, data collections, structure determination and refinement for compound **9**.

|                                                             |                                                                                                                                 |
|-------------------------------------------------------------|---------------------------------------------------------------------------------------------------------------------------------|
| Empirical formula                                           | C <sub>37</sub> H <sub>24</sub> O                                                                                               |
| Formula weight                                              | 484.56                                                                                                                          |
| Temperature (K)                                             | 123(2)                                                                                                                          |
| Radiation and wavelength                                    | Mo-K $\alpha$ , $\lambda$ =0.71075Å                                                                                             |
| Crystal system                                              | monoclinic                                                                                                                      |
| Space group                                                 | <i>P</i> 2 <sub>1</sub> / <i>n</i>                                                                                              |
| Unit cell dimensions                                        | <i>a</i> =10.2162(16)Å<br><i>b</i> =14.533(3)Å<br><i>c</i> =16.867(3)Å<br>$\alpha$ =90°<br>$\beta$ =97.256(7)°<br>$\gamma$ =90° |
| Volume (Å <sup>3</sup> )                                    | 2484.2(7)                                                                                                                       |
| Z, Z'                                                       | 4, 1                                                                                                                            |
| Density (calculated) (Mg/m <sup>3</sup> )                   | 1.296                                                                                                                           |
| Absorption coefficient, $\mu$ (mm <sup>-1</sup> )           | 0.076                                                                                                                           |
| <i>F</i> (000)                                              | 1016                                                                                                                            |
| Crystal colour, description                                 | deep red, chip                                                                                                                  |
| Crystal size (mm)                                           | 0.20 x 0.20 x 0.10                                                                                                              |
| Absorption correction                                       | numerical                                                                                                                       |
| Max. and min. transmission                                  | 0.997982 and 0.999168                                                                                                           |
| $\theta$ -range for data collection                         | 3.056 $\leq$ $\theta$ $\leq$ 18.845°                                                                                            |
| Index ranges                                                | -9 $\leq$ <i>h</i> $\leq$ 9;<br>-13 $\leq$ <i>k</i> $\leq$ 13;<br>-15 $\leq$ <i>l</i> $\leq$ 15                                 |
| Reflections collected                                       | 18838                                                                                                                           |
| Completeness to 2 $\theta$                                  | 0.995                                                                                                                           |
| Independent reflections                                     | 1950 [ <i>R</i> (int) =0.1630]                                                                                                  |
| Reflections <i>I</i> >2 $\sigma$ ( <i>I</i> )               | 1367                                                                                                                            |
| Refinement method                                           | full-matrix least-squares on <i>F</i> <sup>2</sup>                                                                              |
| Data / restraints / parameters                              | 1950 /0 /344                                                                                                                    |
| Goodness-of-fit on <i>F</i> <sup>2</sup>                    | 1.137                                                                                                                           |
| Final <i>R</i> indices [ <i>I</i> >2 $\sigma$ ( <i>I</i> )] | <i>R</i> <sub>1</sub> =0.0688,<br><i>wR</i> <sup>2</sup> =0.1140                                                                |
| <i>R</i> indices (all data)                                 | <i>R</i> <sub>1</sub> =0.1110,<br><i>wR</i> <sup>2</sup> =0.1272                                                                |
| Max. and mean shift/esd                                     | 0.001;0.000                                                                                                                     |
| Largest diff. peak and hole (e.Å <sup>-3</sup> )            | 0.15 and -0.20                                                                                                                  |

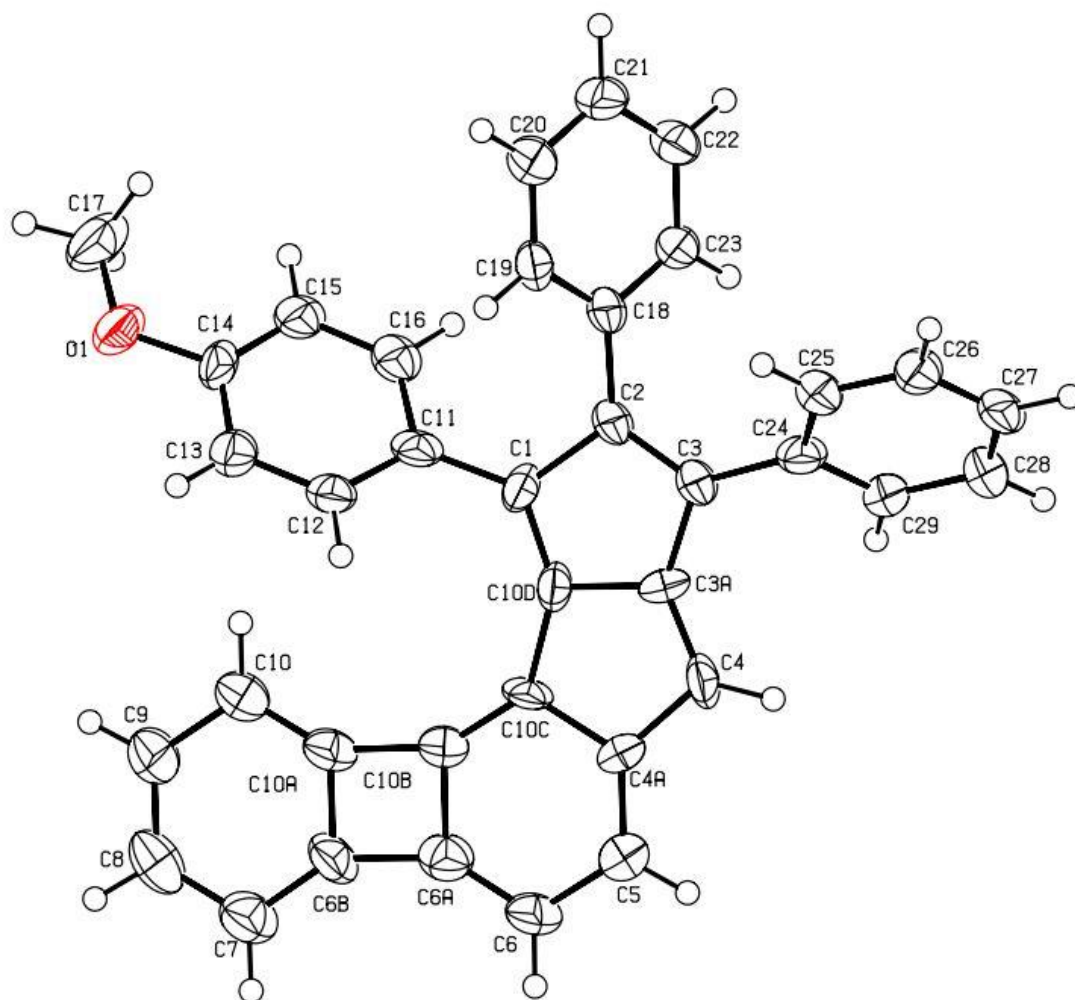

**Figure S1.** ORTEP style diagram of molecule **9** with atomic numbering. ORTEP representation of **9** is drawn at 50% probability level. Arbitrary numbering.

**Table S2.** Comparison of the packing motifs in the different crystals of compound **9**.

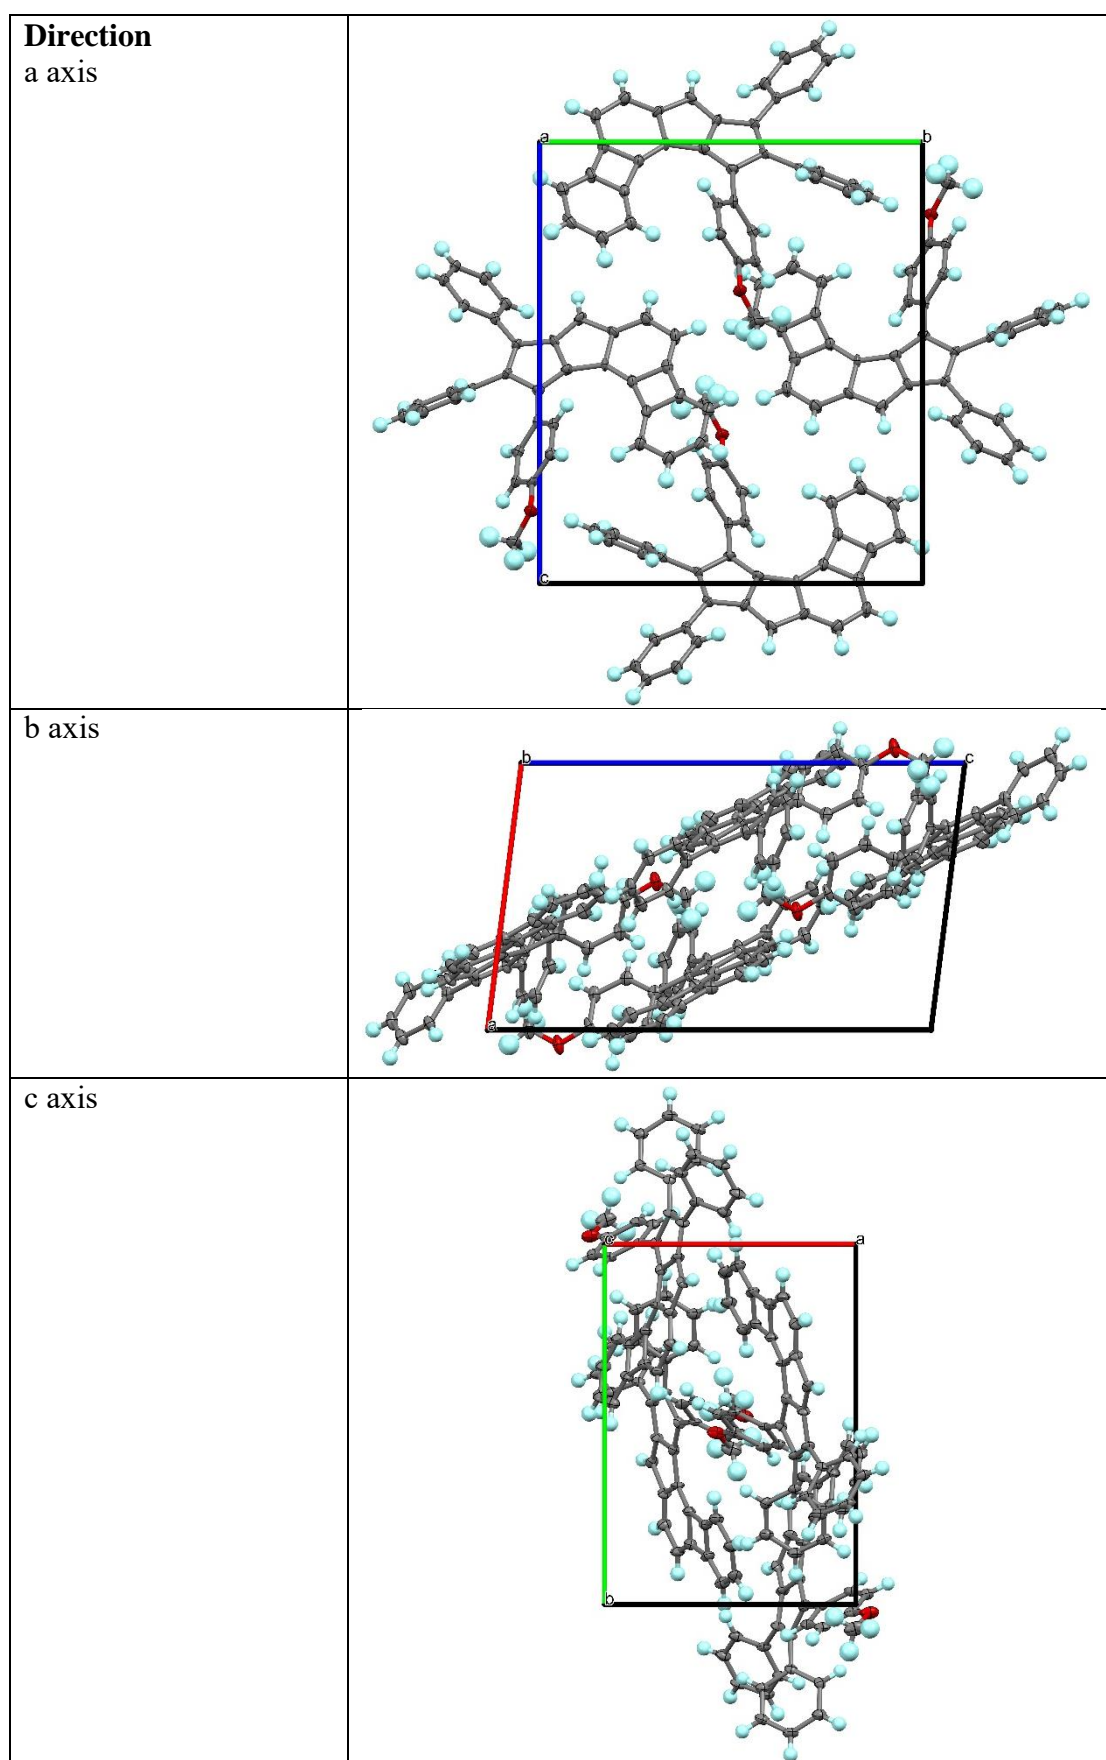

**Table S3.** Comparison of the Hirshfeld surface in the different crystals of compound **9**. More than  $\frac{3}{4}$  (exactly 76.7%) of the contacts are H...H, O, C interactions. 23% of the H interactions are C...H and 2.2% are O...H interactions. It means around 1/3 are attractive and 2/3 are repulsive interactions of the hydrogen atom contacts.

|                                         | <i>Hirshfeld surface</i>                                                            | <i>fingerprint</i>                                                                                                      |
|-----------------------------------------|-------------------------------------------------------------------------------------|-------------------------------------------------------------------------------------------------------------------------|
| all the molecule contact                | 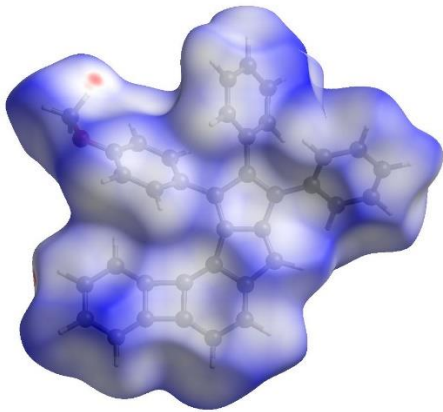  |  <p>100 % of the contacts</p>        |
| H contacts to the neighbouring molecule |  |  <p>76.7 % of the full contacts</p> |



**C contacts to  
the  
neighbouring  
molecule**

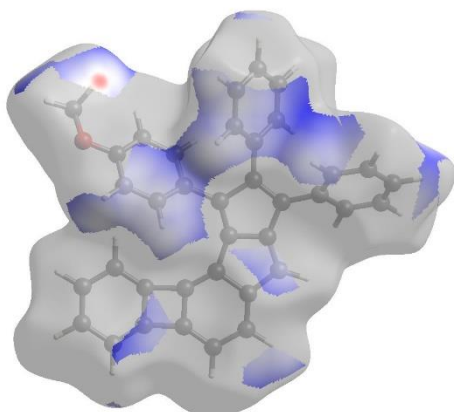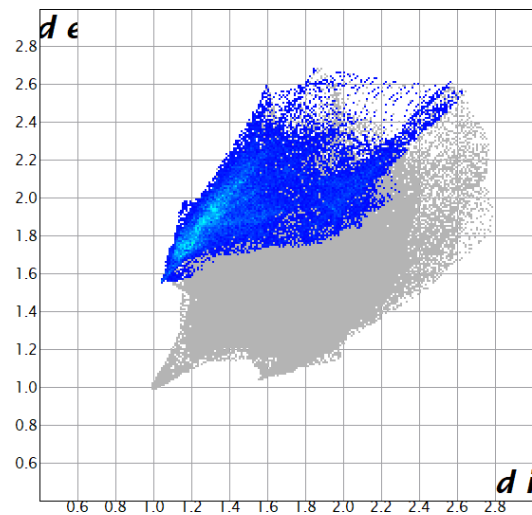

21.5 % of the full contacts

**O contacts to  
the  
neighbouring  
molecule**

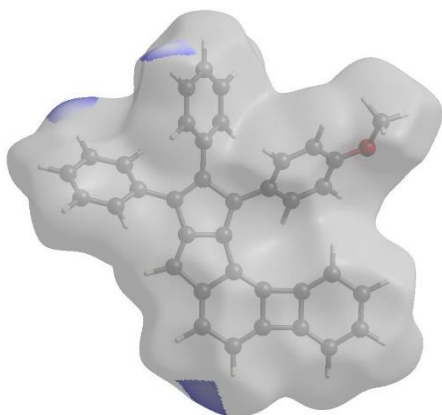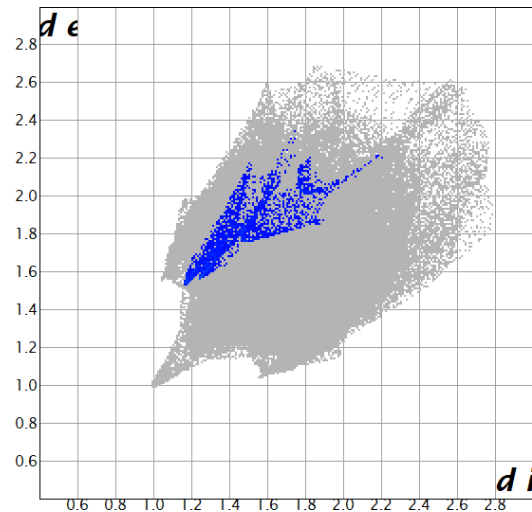

1.8 % of the full contacts

## S2 UV-Vis spectra of compound **9** and **14** in different solvents

A Jasco V-750 UV-Vis spectrophotometer was used for the measurements.  $\text{CHCl}_3$  was spectroscopic grade from VWR, and was treated with basic alumina before the measurement.  $\text{CH}_2\text{Cl}_2$  and THF was freshly distilled from  $\text{CaH}_2$  and Na, respectively, before measurements.

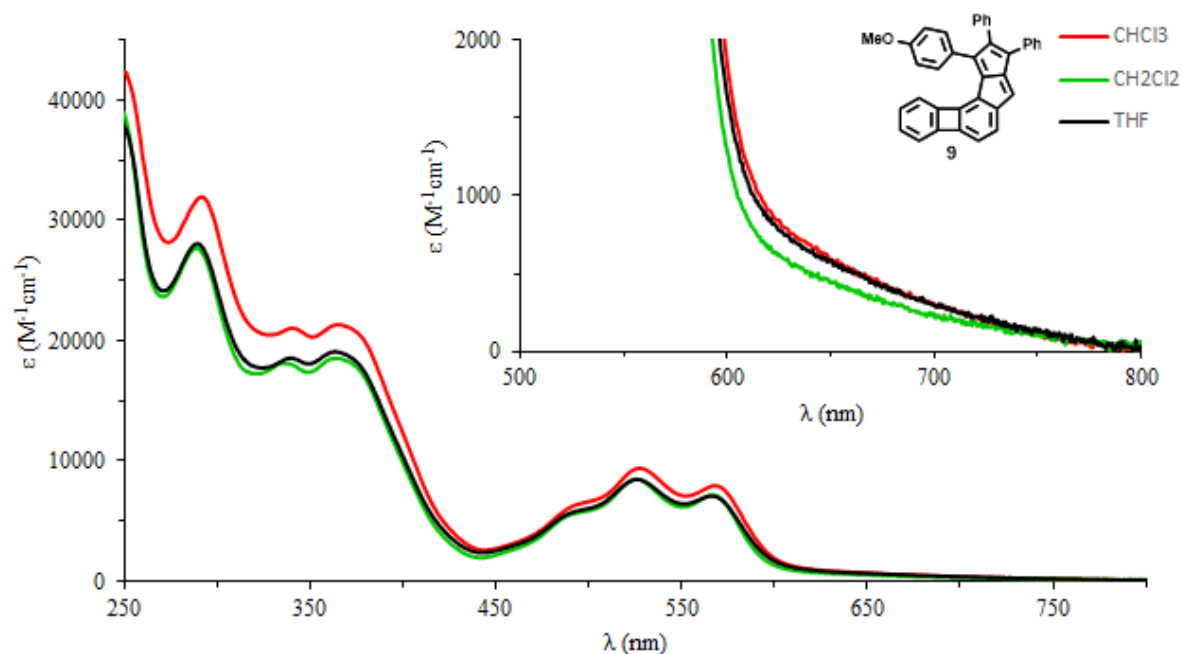

**Figure S2.** UV-Vis spectra of compound **9** in  $\text{CHCl}_3$ ,  $\text{CH}_2\text{Cl}_2$  and THF.

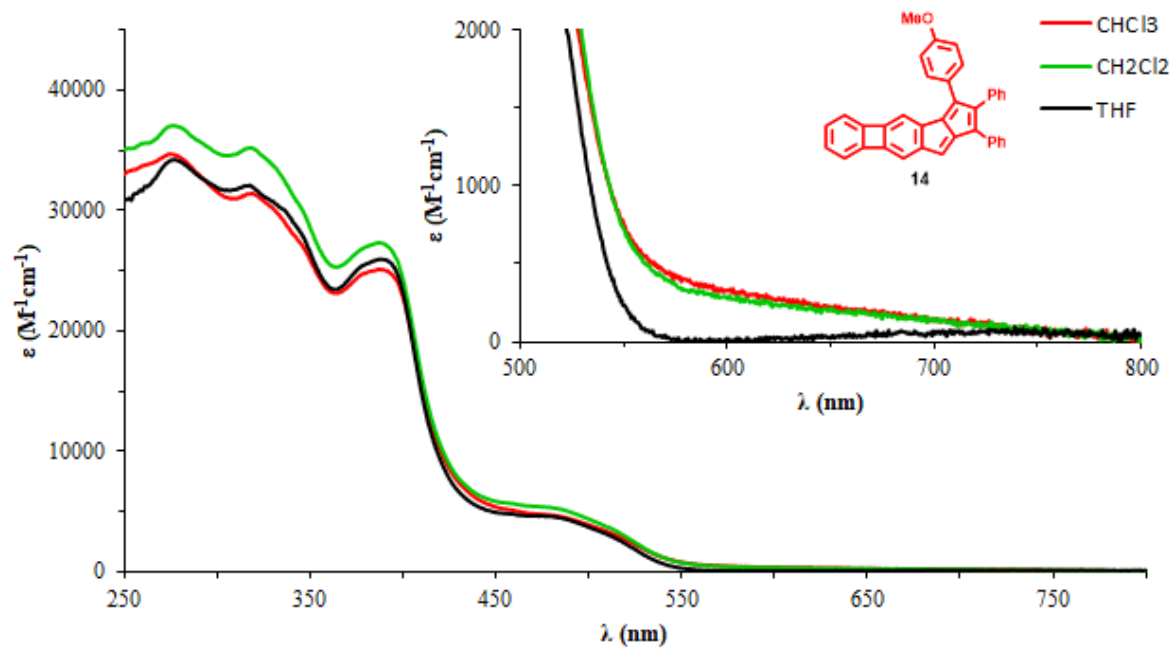

**Figure S3.** UV-Vis spectra of compound **14** in  $\text{CHCl}_3$ ,  $\text{CH}_2\text{Cl}_2$  and THF.

### S3 Electrochemical measurements

Cyclic voltammetry (CV) experiments were performed with a Metrohm Autolab PGSTAT10 type potentiostat/galvanostat in a standard three-electrode setup. Platinum wires were used as the working and counter electrodes and a Ag/AgCl wire as the pseudo-reference electrode. The recorded currents were normalized to the geometric surface area of the platinum working electrode. All measurements were carried out in a 0.1 M solution of tetrabutylammonium hexafluorophosphate ( $\text{Bu}_4\text{NPF}_6$ , Sigma Aldrich, for electrochemical analysis,  $\geq 99.0\%$ ) in dichloromethane (DCM, Sigma Aldrich, anhydrous,  $\geq 99.8\%$ , contains 40–150 ppm amylene as stabilizer) where 0.001 M of the compound was dissolved. The DCM was dried over 3Å molecular sieves and the  $\text{Bu}_4\text{NPF}_6$  was dried in a vacuum oven at 180 °C to ensure water free environment. The electrochemical cell was sealed, and the electrolyte purged with an Ar stream for 5 minutes prior to measurements, to remove  $\text{O}_2$  from the electrolyte.

The potential of the home-made Ag/AgCl pseudo-reference electrode was calibrated during the CV experiments, by measuring the formal potential of the ferrocene/ferrocenium redox couple (0.001 M ferrocene (98%, Aldrich) and 0.1 M  $\text{Bu}_4\text{NPF}_6$  in DCM). The formal potential was determined by CV at multiple scan rates ( $+0.40 \pm 0.01$  V vs. Ag/AgCl).

#### Electrochemical results

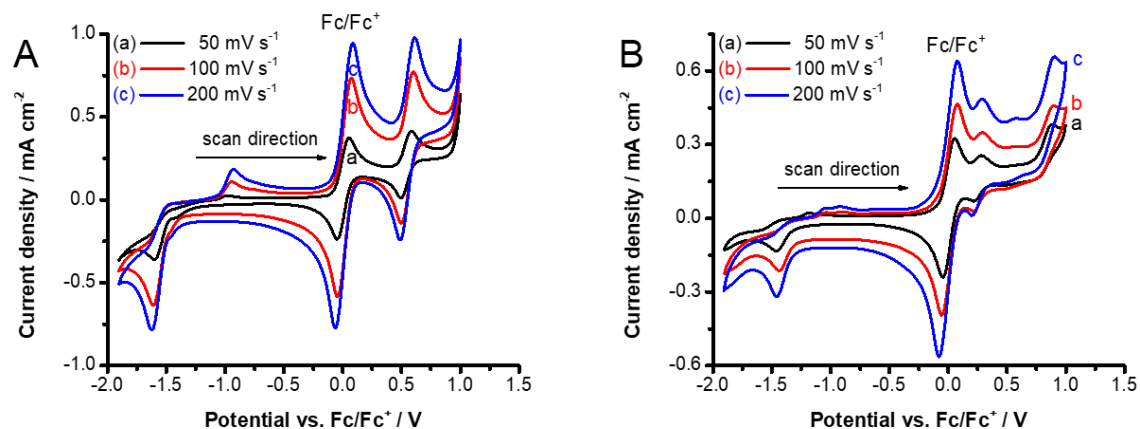

**Figure S4.** Cyclic voltammograms at different sweep rates recorded in 0.1 M  $\text{Bu}_4\text{NPF}_6$  in DCM on a Pt working electrode with ferrocene as an internal standard for 0.001 M of dissolved **A**: compound **9**, and **B**: compound **14**.

The CV scans of compound **9** (Fig. S2 A) showed one irreversible reduction wave ( $-1.47 \pm 0.02$  V vs. Ag/AgCl) and one reversible redox wave ( $0.55 \pm 0.01$  V vs. Ag/AgCl) which can be correlated with the LUMO and HOMO position of the compound, respectively. In the case of compound **14** (Fig. S2 B) the shift of these redox waves was found ( $-1.32 \pm 0.03$  V vs. Ag/AgCl for the LUMO and  $0.25 \pm 0.01$  V vs. Ag/AgCl for the HOMO) and a further irreversible oxidation wave ( $0.75 \pm 0.01$  V vs. Ag/AgCl) emerged.

## S4 Computational studies

### S4.1 General methods

All geometry optimizations were made with the Gaussian 16<sup>8</sup> package using the B3LYP<sup>9</sup> hybrid functional and the 6-311+G(d,p)<sup>10</sup> basis set. Analytical Hessians were computed to confirm that the structures are minima. For triplet state optimizations, the unrestricted formalism was used.

Aromaticity has been assessed by means of magnetic, electronic and geometric indices computed also at (U)B3LYP/6-311+G(d,p) level. As magnetic indicators, the anisotropy of the induced current density (ACID)<sup>11,12</sup> plots and NICS-XY scans<sup>13,14</sup> were used. ACID plots give a qualitative picture of the ring-current nature so that clockwise and anticlockwise ring-currents indicate aromaticity and antiaromaticity character, respectively. NICS-XY scans, which take into account only  $\pi$ -contributions by employing the  $\sigma$ -model, provide quantitative information about diatropicity (negative values) and paratropicity (positive values) of the different circuits.

The multicenter index (MCI) and the aromatic fluctuation index (FLU) were employed as electronic indices. MCI is obtained from  $I_{ring}$  values as follows:

$$MCI(\mathcal{A}) = \frac{1}{2N} \sum_{P(\mathcal{A})} I_{ring}(\mathcal{A})$$

where  $P(\mathcal{A})$  stands for a permutation operator which interchanges the atomic labels  $A_1, A_2 \dots A_N$  to generate up to the  $N!$  permutations of the elements in the string  $\mathcal{A}$ , and the  $I_{ring}$  index is defined as:

$$I_{ring}(\mathcal{A}) = \sum_{i_1, i_2, \dots, i_N} n_{i_1} \dots n_{i_N} S_{i_1 i_2}(A_1) S_{i_2 i_3}(A_2) \dots S_{i_N i_1}(A_N)$$

where  $S_{ij}(A)$  is the overlap of natural orbitals  $i$  and  $j$  in the atom  $A$  defined within the QTAIM scheme,<sup>15</sup> and  $n_i$  are their occupancies. The higher the MCI, the more aromatic are the rings. FLU<sup>16</sup> was computed using delocalization indices,  $\delta(A,B)$ , with the expression:

$$FLU(\mathcal{A}) = \frac{1}{N} \sum_{i=1}^N \left[ \left( \frac{V(A_i)}{V(A_{i-1})} \right)^\alpha \left( \frac{\delta(A_i, A_{i-1}) - \delta_{ref}(A_i, A_{i-1})}{\delta_{ref}(A_i, A_{i-1})} \right) \right]^2 \quad (1)$$

where  $A_0 \equiv A_N$  and the string  $\mathcal{A} = \{A_1, A_2, \dots, A_N\}$  contains the ordered elements according to the connectivity of the  $N$  atoms in a ring or in a chosen circuit.  $V(A)$  is defined as:

$$V(A_i) = \sum_{A_j \neq A_i} \delta(A_i, A_j), \quad (2)$$

and  $\alpha$  is a simple function to make sure that the first term is always greater or equal to 1. The delocalization indices of Eq. 1 were calculated using the overlaps between occupied molecular orbitals in the atomic basins generated by AIMAll program.<sup>17</sup> The  $\delta_{ref}(C, C)$  reference value of 1.389 e used for C–C bond in FLU calculations corresponds to the  $\delta(C, C)$  of benzene computed at the B3LYP/6-311+G(d,p) level of theory. FLU is close to 0 in aromatic species, and differs from it in non-aromatic ones. To analyze the Baird vs. Hückel-aromatic character of our systems in their triplet states, FLU values are split into  $\alpha$  and  $\beta$  contributions. In Hückel-aromatic rings or circuits, identical or very similar values of  $FLU_\alpha$  and  $FLU_\beta$  are expected, while significant differences ( $\Delta FLU_{\alpha\beta} = FLU_\alpha - FLU_\beta \neq 0$ ) are predicted in Baird-aromatic systems. As an indicator of Hückel (low values) or Baird (high values) aromatic character, we defined the  $\Delta FLU_{\alpha\beta}/FLU$  ratio ( $\gamma$ ). As defined,  $\gamma$  allows consistent comparisons between species with different absolute aromaticity FLU values.<sup>18</sup> To compute  $FLU_\alpha$  and  $FLU_\beta$ , the same Eq. 1 was used but now considering only the  $\alpha$  or  $\beta$  MSOs and taking the  $\delta_{ref}(C, C)$  reference value in Eq. 1 as half the reference value used for nonspin split FLU calculations. FLU and MCI were obtained with the ESI program.<sup>19</sup>

The aromatic character was also evaluated using HOMA<sup>20,21</sup> as a geometric index. It is defined as:

$$HOMA = 1 - \frac{\alpha}{n} \sum_{i=1}^n (R_{opt} - R_i)^2$$

where  $n$  is the number of bonds considered,  $\alpha$  is an empirical constant (for C–C,  $\alpha = 257.7$ ),  $R_{opt}$  is an optimal bond value (1.388 Å for C–C and  $R_i$  stands for a running bond length. This expression is optimized to give  $HOMA = 1$  for fully aromatic systems,  $HOMA = 0$  for a nonaromatic system, and negative HOMA values typically indicate antiaromaticity.

## S4.2 Aromaticity analyses of the molecules and their conjugated cores

### S4.2.1 ACID plots

**Table S4.** ACID plots of conjugated cores **17'**, **15'** and **16'** in their  $S_0$  and the  $T_1$  states. In the plots, the direction of the induced ring currents are shown by small arrows, where the red dots indicate the heads, while the green lines indicate the shafts of the arrows.

| Entry | Molecule   | $S_0$                                                                                                                                                                                                                                          | $T_1$                                                                                                                                                                      |
|-------|------------|------------------------------------------------------------------------------------------------------------------------------------------------------------------------------------------------------------------------------------------------|----------------------------------------------------------------------------------------------------------------------------------------------------------------------------|
| 1     | <b>17'</b> | 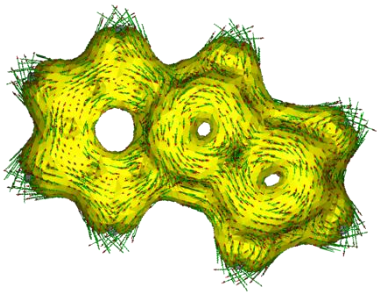 <p>Antiaromatic (AA) counter-clockwise ring-current through the pentalene ring; Weak aromatic (WA) clockwise ring-current in the benzene ring.</p>           |  <p>Aromatic (A) clockwise ring-current in the perimeter.</p>                            |
| 2     | <b>15'</b> |  <p>AA ring-current in the pentalene ring; WA ring-current in the naphthalene ring.</p>                                                                     |  <p>A ring-current in the perimeter.</p>                                              |
| 3     | <b>16'</b> |  <p>Weak antiaromatic (WAA) ring-current in the pentalene part; A ring-current in the first benzene ring; the second benzene ring is non-aromatic (NA).</p> |  <p>A ring-current in the naphthalene ring; WA ring-current in the pentalene ring.</p> |

We can observe (Table S4) a larger change in aromaticity as the effect of the excitation from the ground state ( $S_0$ ) to the first triplet state ( $T_1$ ) in case of bent naphtho-pentalene (**15'**) compared to the linear derivative (**16'**). In the ground state ( $S_0$ ) the antiaromaticity of the pentalene subunit is higher in the case of **15'** compared to **16'**.

**Table S5.** ACID plots of the conjugated cores **9'** and **14'** in the  $S_0$  and the  $T_1$  states.

| Entry | Molecule   | $S_0$                                                                                                                                                                                                                                                       | $T_1$                                                                                                                                                                                                                                                       |
|-------|------------|-------------------------------------------------------------------------------------------------------------------------------------------------------------------------------------------------------------------------------------------------------------|-------------------------------------------------------------------------------------------------------------------------------------------------------------------------------------------------------------------------------------------------------------|
| 1     | <b>9'</b>  | 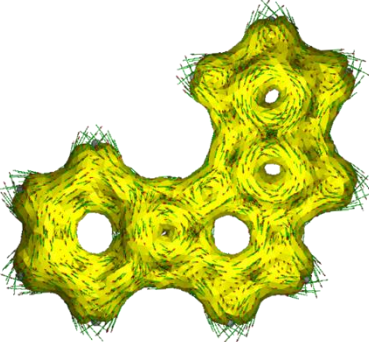 <p>WAA ring-current in the pentalene ring; WAA ring-current in the cyclobutadiene ring; WA ring-current in the terminal benzene ring; the middle benzene ring is NA.</p>  |  <p>The pentalene and the middle benzene rings are NA; AA ring-current in the cyclobutadiene ring; WA ring-current in the terminal benzene ring.</p>                      |
| 2     | <b>14'</b> |  <p>AA ring-current in the pentalene unit; WAA ring-current in the cyclobutadiene ring; WA ring-current in the terminal benzene ring; the middle benzene ring is NA.</p> |  <p>A ring-current in the pentalene unit; WAA ring-current in the cyclobutadiene ring; WA ring-current in the terminal benzene ring; the middle benzene ring is NA.</p> |

In case of the biphenyleno-pentalenes (Table S5) we can observe an opposite relationship of aromatic behavior compared to the naphtho-pentalenes (Table S4). In the case of the biphenyleno-pentalenes the linear derivative (**14'**) has a more antiaromatic pentalene moiety and shows a larger change in aromaticity as the effect of the excitation from the ground state ( $S_0$ ) to the first triplet state ( $T_1$ ).



**Table S6.** ACID plots of naphtho-pentalene derivatives **15** and **16** in their  $S_0$  and the  $T_1$  states.

| Entry | Molecule  | $S_0$                                                                                                                                                                                                      | $T_1$                                                                                                                                                        |
|-------|-----------|------------------------------------------------------------------------------------------------------------------------------------------------------------------------------------------------------------|--------------------------------------------------------------------------------------------------------------------------------------------------------------|
| 1     | <b>15</b> | 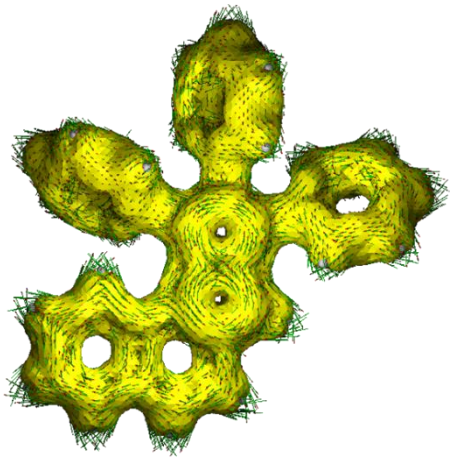 <p>AA ring current in the pentalene unit; A ring current in the naphthalene unit.</p>                                    |  <p>A ring current in the perimeter of the molecule.</p>                   |
| 2     | <b>16</b> |  <p>WAA ring current in the pentalene unit; A ring current in the first benzene ring; the second benzene ring is NA.</p> |  <p>The pentalene unit is NA; A ring current in the naphthalene unit.</p> |

According to the ACID plots the aromaticity relationship between molecules **15** and **16** is similar to that of **15'** and **16'**.

**Table S7.** ACID plots of biphenyleno-pentalene derivatives **9**, and **14** in their  $S_0$  and the  $T_1$  states.

| Entry | Molecule  | $S_0$                                                                                                                                                                                                                                                       | $T_1$                                                                                                                                                                                                                                                       |
|-------|-----------|-------------------------------------------------------------------------------------------------------------------------------------------------------------------------------------------------------------------------------------------------------------|-------------------------------------------------------------------------------------------------------------------------------------------------------------------------------------------------------------------------------------------------------------|
| 1     | <b>9</b>  | 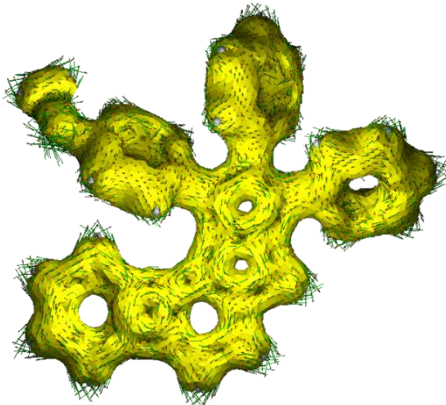 <p>WAA ring-current in the pentalene unit; WAA ring-current in the cyclobutadiene ring; WA ring-current in the terminal benzene ring; the middle benzene ring is NA.</p>  |  <p>The pentalene unit and the middle benzene ring are NA; AA ring-current in the cyclobutadiene ring; WA ring-current in the terminal benzene ring.</p>                  |
| 2     | <b>14</b> |  <p>AA ring-current in the pentalene ring; WAA ring-current in the cyclobutadiene part; WA ring-current in the terminal benzene ring; the middle benzene ring is NA.</p> |  <p>A ring-current in the pentalene unit; WAA ring-current in the cyclobutadiene ring; WA ring-current in the terminal benzene ring; the middle benzene ring is NA.</p> |

According to the ACID plots (Table S7) the aromaticity relationship between molecules **9** and **14** is similar to that of **9'** and **14'**. Based on the similarity of the ACID plots for further calculations we only used the conjugated cores of the molecules.

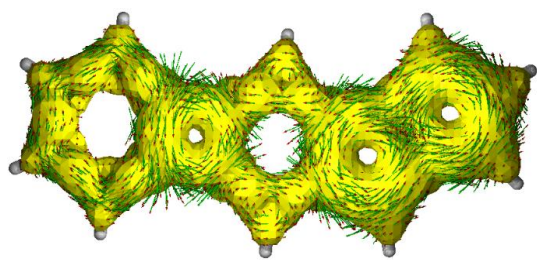

**14' S<sub>0</sub>**

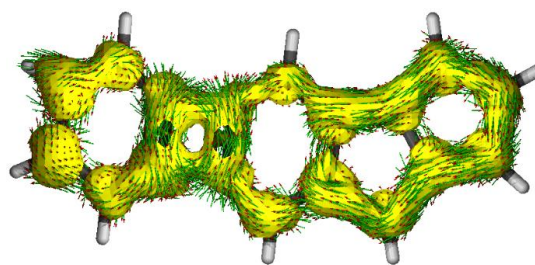

**14' T<sub>1</sub>**

**Figure S5.**  $\pi$ -Only ACID plots of **14'** in its S<sub>0</sub> and the T<sub>1</sub> states.

## S4.2.2 NICS-XY scans and tables of HOMA values

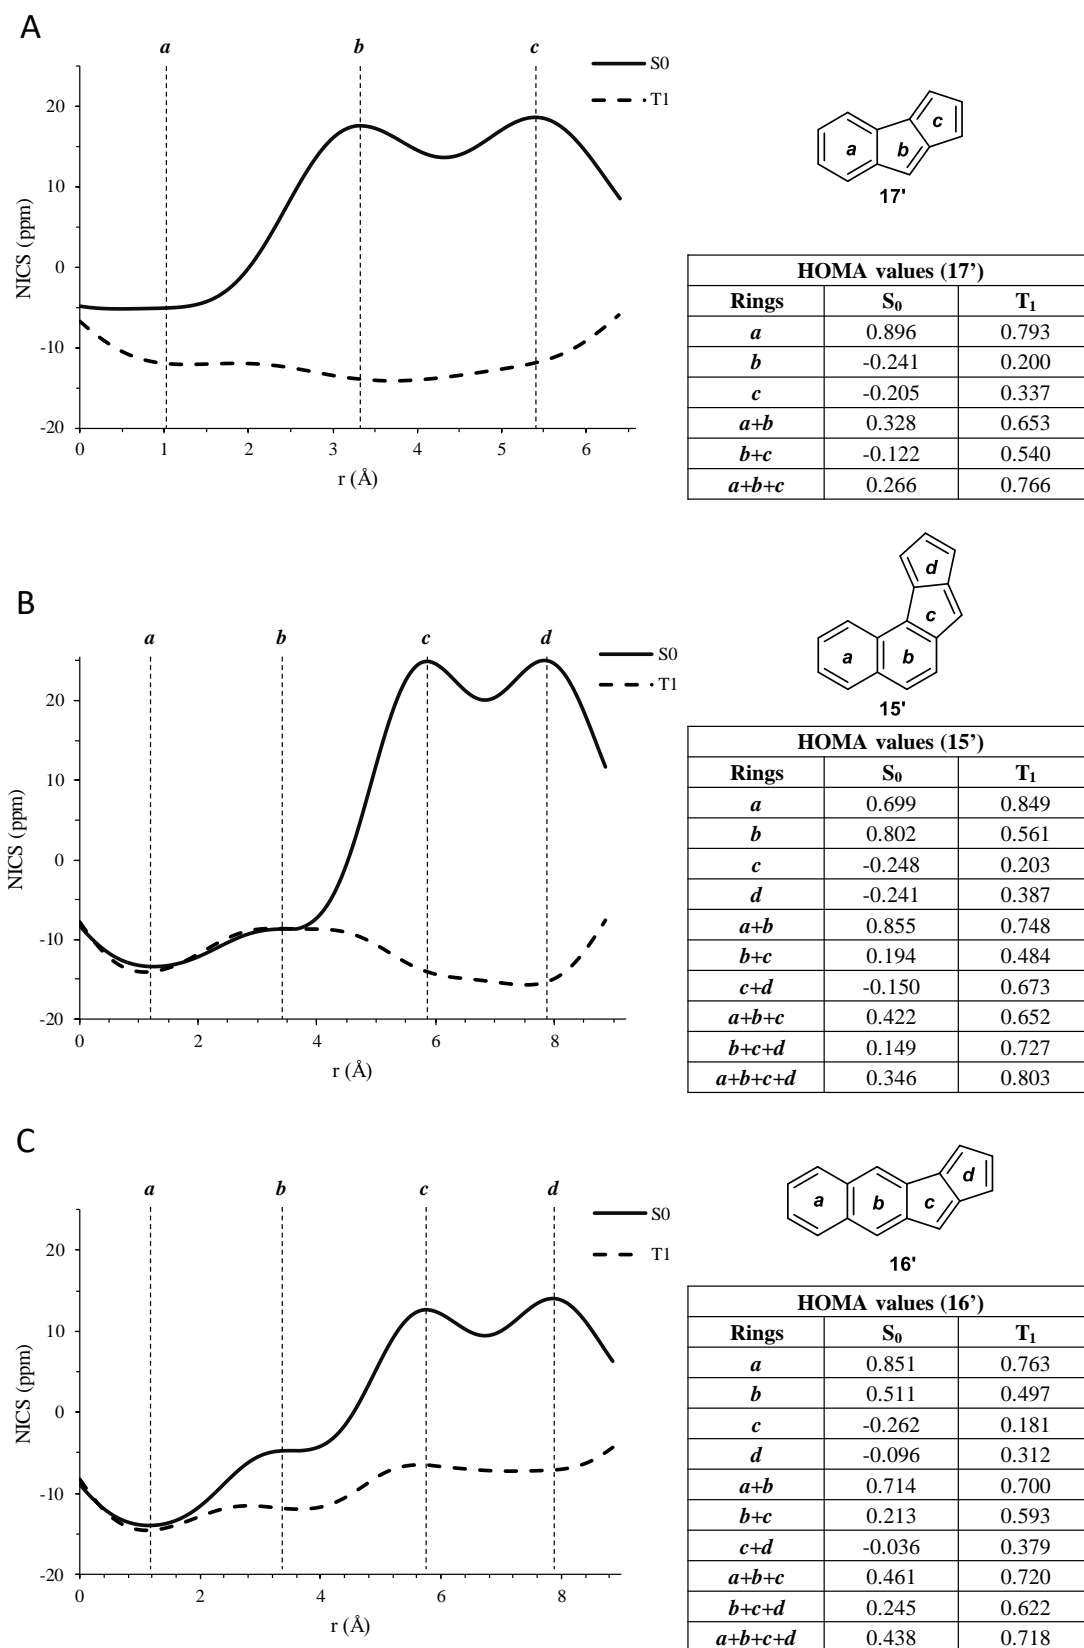

**Figure S6.** NICS-XY scans and HOMA values of **17'** (A), **15'** (B) and **16'** (C).

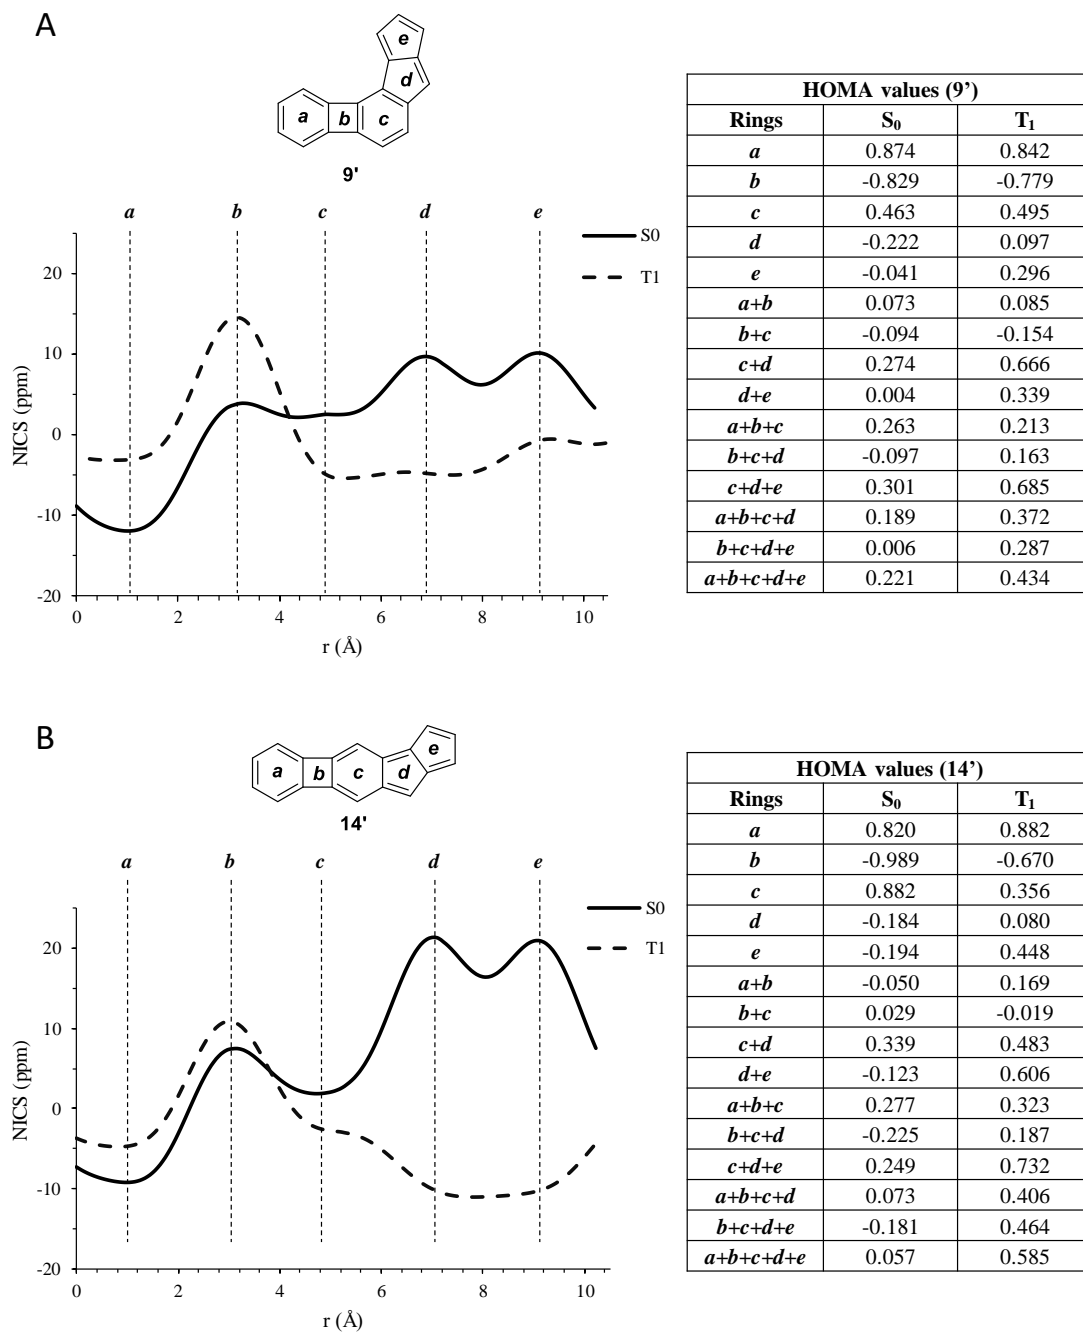

**Figure S7.** NICS-XY scans and HOMA values of **9'** (A) and **14'** (B).

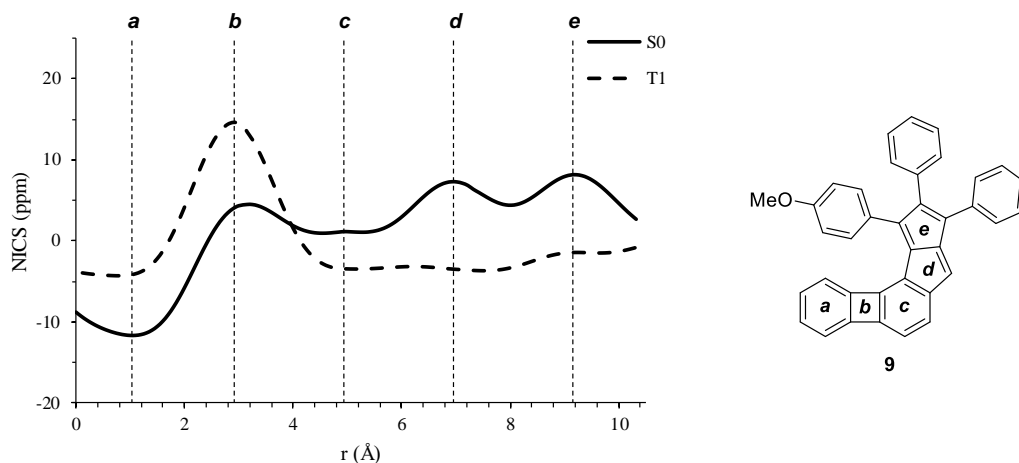

| HOMA values ( <b>9</b> ) |                |                |                      |
|--------------------------|----------------|----------------|----------------------|
| Rings                    | S <sub>0</sub> | T <sub>1</sub> | Experimental (X-ray) |
| <i>a</i>                 | 0.875          | 0.852          | 0.859                |
| <i>b</i>                 | -0.864         | -0.804         | -0.729               |
| <i>c</i>                 | 0.470          | 0.486          | 0.507                |
| <i>d</i>                 | -0.149         | 0.151          | -0.027               |
| <i>e</i>                 | -0.194         | 0.129          | -0.032               |
| <i>a+b</i>               | 0.054          | 0.075          | 0.066                |
| <i>b+c</i>               | -0.104         | -0.146         | -0.034               |
| <i>c+d</i>               | 0.350          | 0.679          | 0.313                |
| <i>d+e</i>               | -0.148         | 0.175          | -0.079               |
| <i>a+b+c</i>             | 0.255          | 0.221          | 0.265                |
| <i>b+c+d</i>             | -0.045         | 0.184          | -0.045               |
| <i>c+d+e</i>             | 0.226          | 0.563          | 0.193                |
| <i>a+b+c+d</i>           | 0.226          | 0.389          | 0.197                |
| <i>b+c+d+e</i>           | -0.067         | 0.191          | -0.071               |
| <i>a+b+c+d+e</i>         | 0.164          | 0.361          | 0.136                |

**Figure S8.** NICS-XY scans and HOMA values of **9**.

The results for the substituted molecule (**9**, Figure S5) are in agreement with those of the corresponding conjugated core (**9'**, Figure S4). Based on the similarity, the substituents have negligible effect on the aromaticity of the conjugated cores. The calculated HOMA values based on the optimized structure are in agreement with HOMA values calculated from the experimentally determined bond lengths.

### S4.2.3 Electronic indices FLU and MCI

**Table S8.** FLU and MCI values of **9'** and **14'** in their  $S_0$  and  $T_1$  states.

| Rings            | <b>9'</b> |       |         |       |                      | <b>14'</b> |       |         |       |                      |
|------------------|-----------|-------|---------|-------|----------------------|------------|-------|---------|-------|----------------------|
|                  | Singlet   |       | Triplet |       |                      | Singlet    |       | Triplet |       |                      |
|                  | MCI       | FLU   | MCI     | FLU   | $\Delta$ FLU/<br>FLU | MCI        | FLU   | MCI     | FLU   | $\Delta$ FLU/<br>FLU |
| <b>a</b>         | 0.053     | 0.004 | 0.052   | 0.006 | 0.34                 | 0.054      | 0.006 | 0.050   | 0.004 | 0.30                 |
| <b>b</b>         | 0.023     | 0.048 | 0.025   | 0.046 | 0.06                 | 0.022      | 0.045 | 0.026   | 0.047 | 0.11                 |
| <b>c</b>         | 0.031     | 0.017 | 0.025   | 0.014 | 0.24                 | 0.045      | 0.005 | 0.018   | 0.020 | 0.40                 |
| <b>a+b+c</b>     | -         | 0.017 | -       | 0.018 | 0.00                 | -          | 0.015 | -       | 0.017 | 0.07                 |
| <b>c+d+e</b>     | -         | 0.024 | -       | 0.011 | 0.96                 | -          | 0.025 | -       | 0.010 | 0.48                 |
| <b>a+b</b>       | 0.000     | 0.023 | 0.000   | 0.021 | 0.00                 | -0.002     | 0.022 | 0.002   | 0.022 | 0.06                 |
| <b>d+e</b>       | 0.001     | 0.034 | 0.005   | 0.020 | 0.70                 | -0.001     | 0.036 | -       | 0.011 | 0.78                 |
| <b>Perimeter</b> | -         | 0.022 | -       | 0.014 | 0.40                 | -          | 0.025 | -       | 0.011 | 0.16                 |

**Table S9.** FLU and MCI values of **9'** and **14'** in their  $S_1$  state.

| Rings            | <b>9'</b> |       | <b>14'</b> |       |
|------------------|-----------|-------|------------|-------|
|                  | $S_1$     |       |            |       |
|                  | MCI       | FLU   | MCI        | FLU   |
| <b>a</b>         | 0.054     | 0.006 | 0.050      | 0.005 |
| <b>b</b>         | 0.022     | 0.047 | 0.024      | 0.050 |
| <b>c</b>         | 0.023     | 0.013 | 0.019      | 0.016 |
| <b>a+b+c</b>     | -         | 0.019 | -          | 0.017 |
| <b>c+d+e</b>     | -         | 0.007 | -          | 0.011 |
| <b>a+b</b>       | -0.002    | 0.023 | 0.002      | 0.023 |
| <b>d+e</b>       | 0.002     | 0.015 | 0.003      | 0.014 |
| <b>Perimeter</b> | -         | 0.013 | -          | 0.013 |

**Table S10.** FLU and MCI values of **15'** and **16'** in their  $S_0$  and  $T_1$  states.

| Rings            | <b>15'</b> |       |         |       |                      | <b>16'</b> |       |         |       |                      |
|------------------|------------|-------|---------|-------|----------------------|------------|-------|---------|-------|----------------------|
|                  | Singlet    |       | Triplet |       |                      | Singlet    |       | Triplet |       |                      |
|                  | MCI        | FLU   | MCI     | FLU   | $\Delta$ FLU/<br>FLU | MCI        | FLU   | MCI     | FLU   | $\Delta$ FLU/<br>FLU |
| <b>a</b>         | 0.034      | 0.012 | 0.042   | 0.006 | 0.13                 | 0.043      | 0.006 | 0.036   | 0.009 | 0.08                 |
| <b>b</b>         | 0.032      | 0.008 | 0.016   | 0.017 | 0.25                 | 0.023      | 0.017 | 0.019   | 0.015 | 0.20                 |
| <b>a+b</b>       | 0.008      | 0.008 | 0.004   | 0.011 | 0.20                 | 0.006      | 0.011 | 0.005   | 0.010 | 0.01                 |
| <b>c+d</b>       | -0.001     | 0.037 | 0.013   | 0.011 | 0.92                 | 0.001      | 0.035 | 0.004   | 0.019 | 0.69                 |
| <b>Perimeter</b> | -          | 0.023 | -       | 0.008 | 0.47                 | -          | 0.020 | -       | 0.001 | 0.73                 |

**Table S11.** FLU and MCI values of **15'** and **16'** in their  $S_1$  state.

| Rings            | <b>15'</b> |       | <b>16'</b> |              |
|------------------|------------|-------|------------|--------------|
|                  | $S_1$      |       |            |              |
|                  | MCI        | FLU   | MCI        | FLU          |
| <b>a</b>         | 0.041      | 0.008 | 0.032      | 0.011        |
| <b>b</b>         | 0.016      | 0.017 | 0.016      | 0.016        |
| <b>a+b</b>       | -          | 0.011 | -          | 0.011        |
| <b>c+d</b>       | 0.004      | 0.012 | 0.002      | <b>0.015</b> |
| <b>Perimeter</b> | -          | 0.010 | -          | 0.008        |

### S4.3 Aromaticity analyses (NICS-XY scan, HOMA, FLU and MCI) of subunits benzocyclobutadiene (BCB, S1) and pentalene (S2)

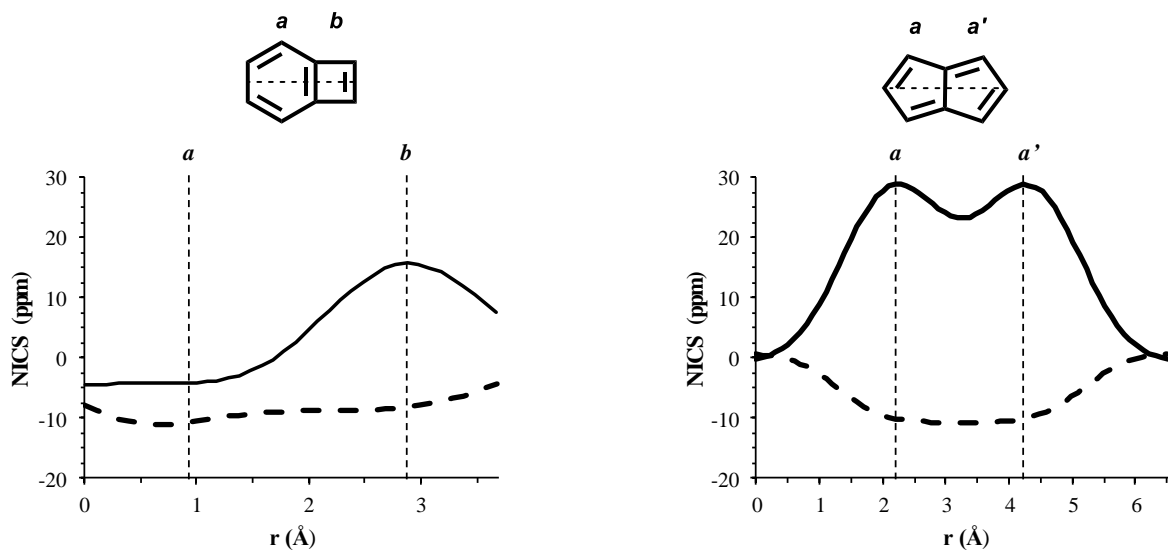

**Figure S9.** NICS-XY scans of **S1** and **S2** in their  $S_0$  (solid line) and  $T_1$  (dashed line) states.

**Table S12.** HOMA values of **S1** and **S2** in their  $S_0$  and  $T_1$  states.

| Rings       | HOMA values |        |           |       |
|-------------|-------------|--------|-----------|-------|
|             | BCB         |        | Pentalene |       |
|             | $S_0$       | $T_1$  | $S_0$     | $T_1$ |
| <i>a</i>    | 0.681       | 0.654  | -         | -     |
| <i>b</i>    | -1.593      | -0.162 | -         | -     |
| <i>a+b</i>  | -0.460      | 0.568  | -         | -     |
| <i>a+a'</i> | -           | -      | -0.388    | 0.820 |

**Table S13.** FLU and MCI (in bracket) values of **S1** and **S2** in their  $S_0$  and  $T_1$  states.

| Rings       | FLU (MCI) values |               |                |               |
|-------------|------------------|---------------|----------------|---------------|
|             | BCB              |               | Pentalene      |               |
|             | $S_0$            | $T_1$         | $S_0$          | $T_1$         |
| <i>a</i>    | 0.013 (0.050)    | 0.012 (0.020) | -              | -             |
| <i>b</i>    | 0.065 (0.021)    | 0.028 (0.066) | -              | -             |
| <i>a+b</i>  | 0.036 (-0.010)   | 0.009 (0.017) | -              | -             |
| <i>a+a'</i> | -                | -             | 0.045 (-0.005) | 0.004 (0.025) |



**Table S14.** Comparison of HOMA values BCB and pentalene in compound **9'** and **14'**.

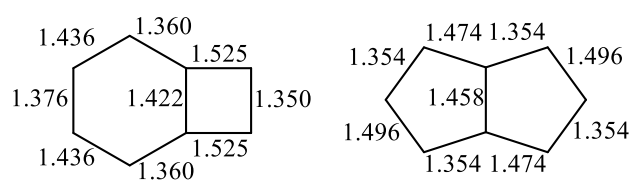

|                                  | <b>9'</b> | <b>14'</b> | Separate molecules | $\Delta\text{HOMA}(\mathbf{9}' - \text{sep. molecule})$ | $\Delta\text{HOMA}(\mathbf{14}' - \text{sep. molecule})$ |
|----------------------------------|-----------|------------|--------------------|---------------------------------------------------------|----------------------------------------------------------|
| $\text{HOMA}_{\text{BCB}}$       | 0.073     | -0.050     | -0.460             | 0.533                                                   | 0.410                                                    |
| $\text{HOMA}_{\text{Pentalene}}$ | 0.004     | -0.123     | -0.380             | 0.384                                                   | 0.257                                                    |

#### S4.4 Aromaticity analysis of subunits S1, S2, S3, S4, S5 and 17'

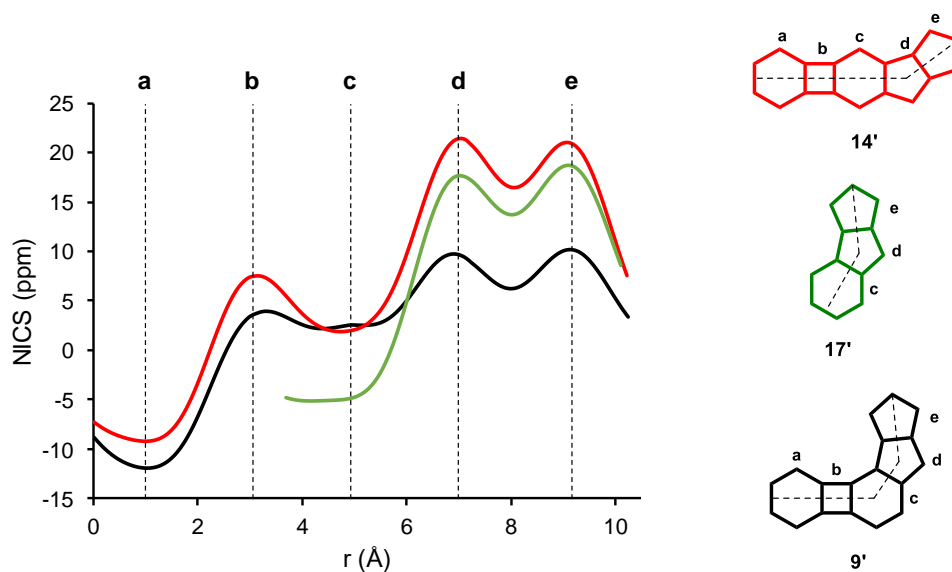

**Figure S10.** Comparison of NICS-XY scans of compounds 9', 14' and 17' in their S<sub>0</sub> states.

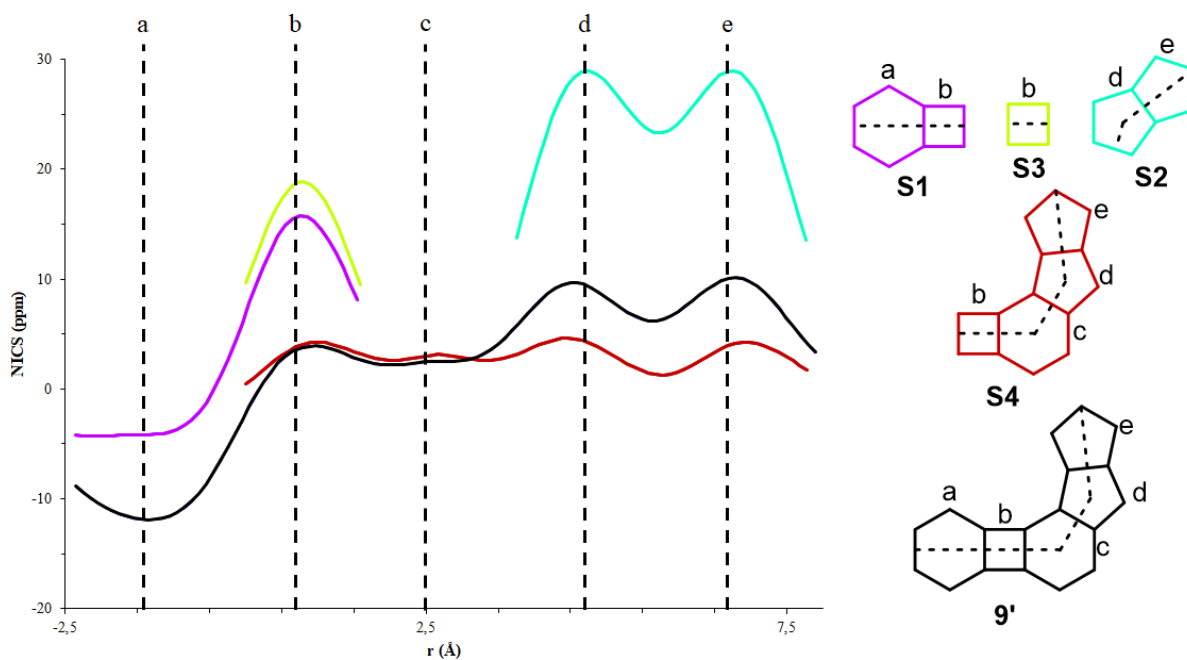

**Figure S11.** Comparison of NICS-XY scans of compounds S1, S2, S3, S4 and 9' in their S<sub>0</sub> states.

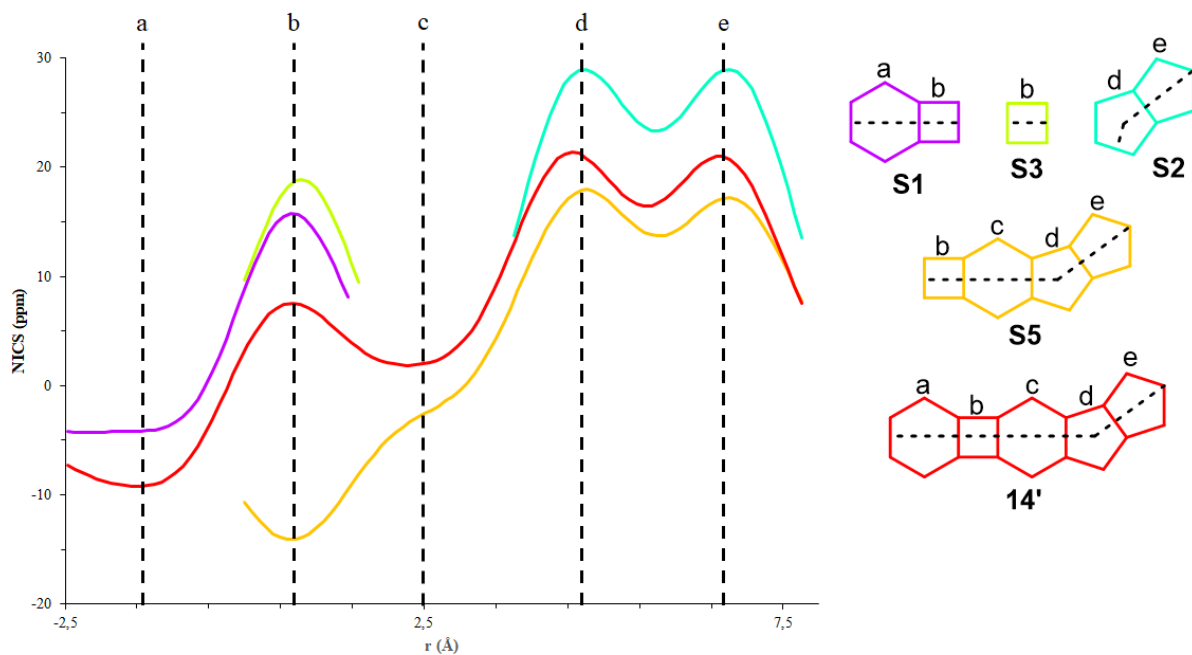

**Figure S12.** Comparison of NICS-XY scans of compounds **S1**, **S2**, **S3**, **S5** and **14'** in their  $S_0$  states.

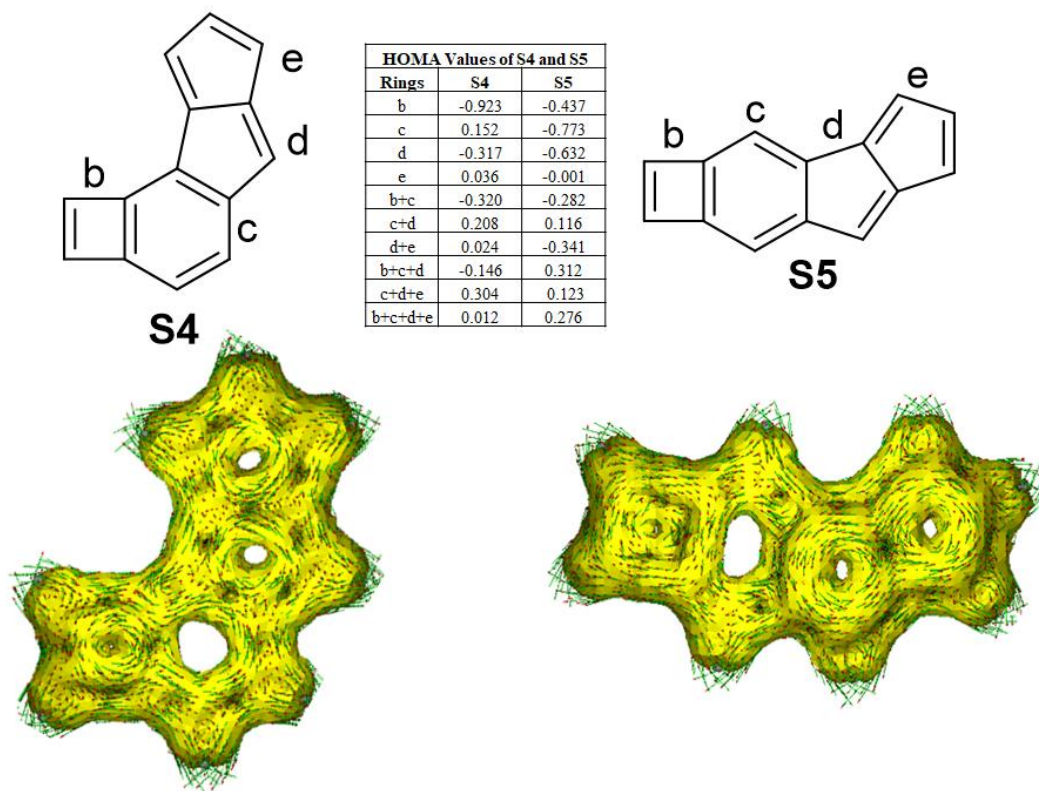

**Figure S13.** HOMA values and ACID plots of compound **S4** and **S5**.

The results show, that in the angular case (**S4**), due to the bond localization in the central benzene ring, the antiaromaticity of both the cyclobutadiene and the pentalene units are strongly reduced (Figure S11). Regarding the linear case (**S5**), cyclobutadiene “wins the battle” and alleviate its antiaromaticity at the expense of maintained pentalene antiaromaticity (Figure S12). The overall outcome is similar to compounds **9'** and **14'**. However, in the linear case of **S5**, the cyclobutadiene unit gains a considerable aromatic character compared to the situation in **14'**, where it remains slightly antiaromatic along with some aromaticity gain in the terminal benzene ring. Thus, the aromaticity/antiaromaticity relationships between the subunits in **S5** versus **14'** show a clear difference between the two systems that suggest that in **14'** the  $8\pi$  BCB subunit is more influential than the  $4\pi$  cyclobutadiene ring itself.

#### S4.5 Calculated SOMOs of the radical anion and cation of **9'** and **14'**

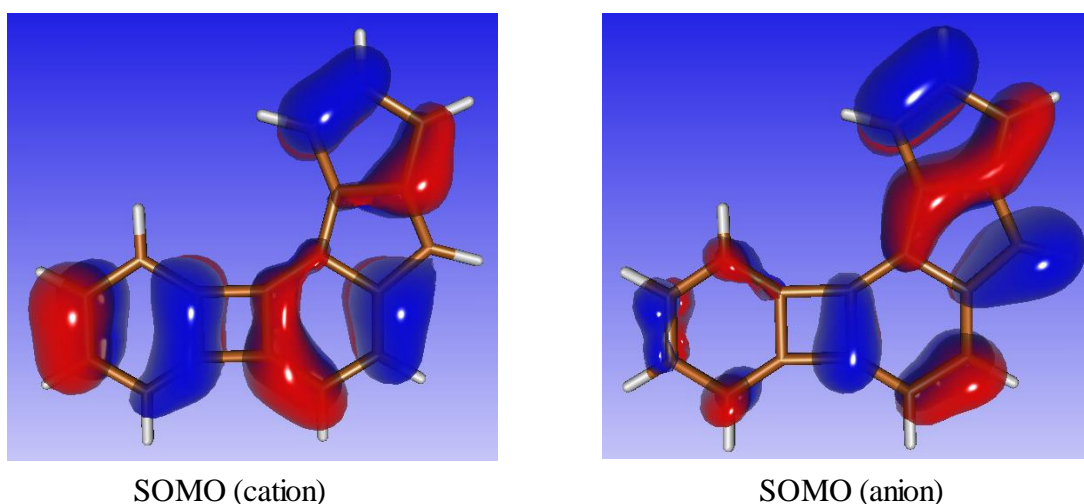

**Figure S14.** Calculated SOMOs of radical anion and cation of **9'**.

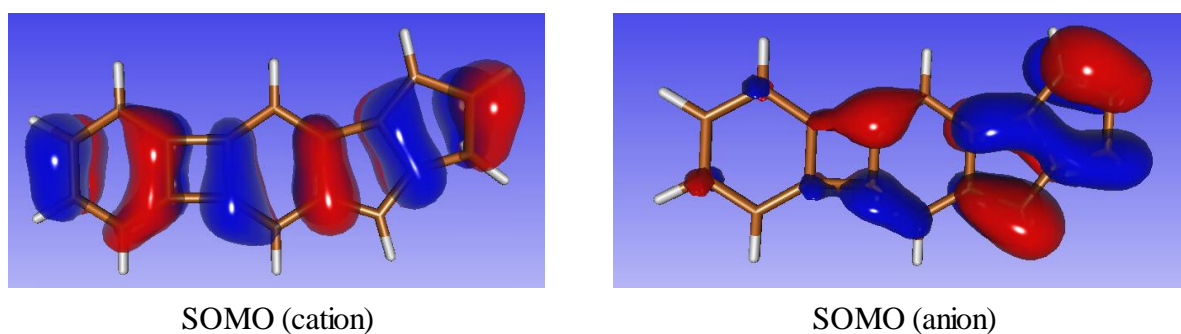

**Figure S15.** Calculated SOMOs of radical anion and cation of **14'**.

## S4.6 Calculated LUMOs of 14

Table S15. Calculated LUMOs of 14.

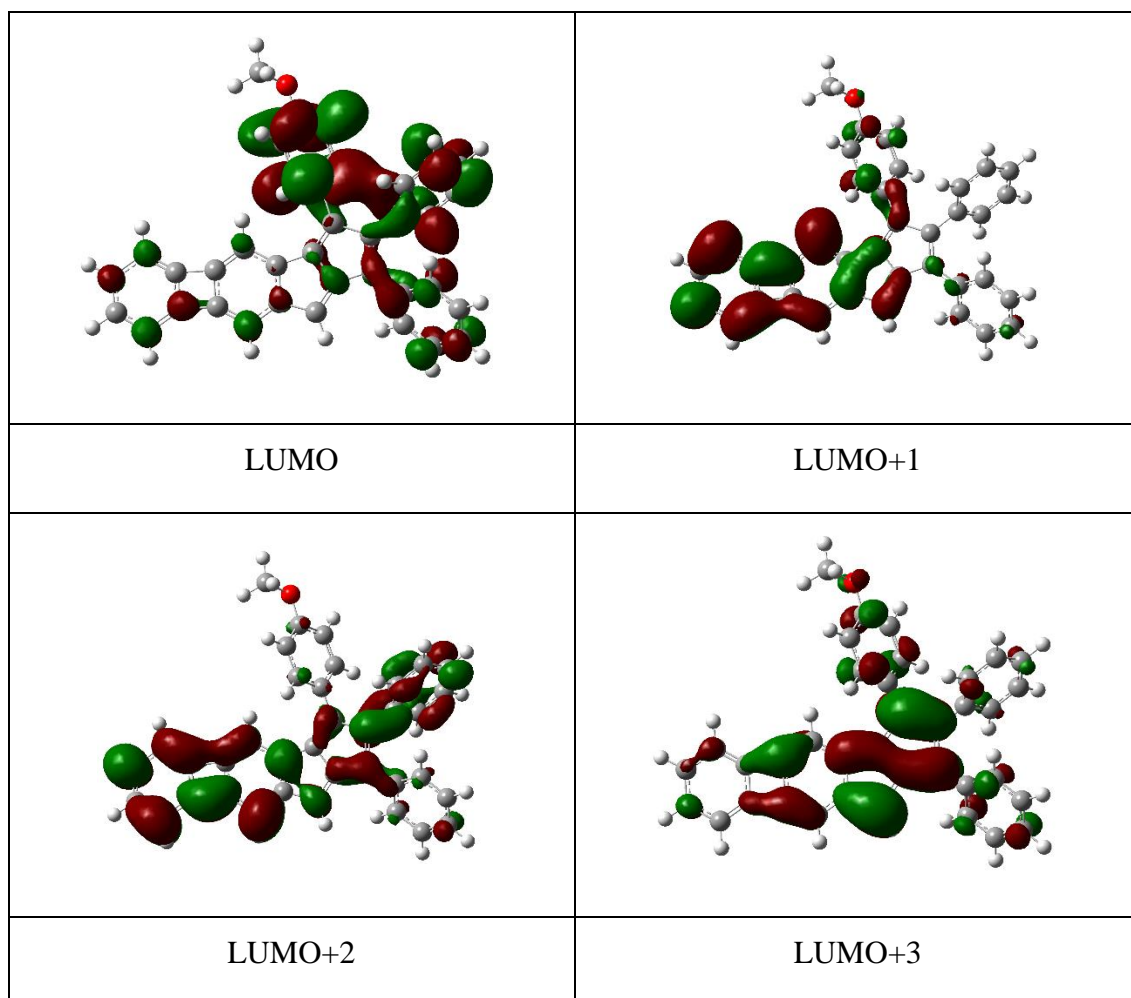

## S4.7 Cartesian coordinates and absolute electronic energies

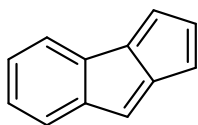

Cyclopenta[*a*]indene **17'**

$S_0$

$E_{el} = -462.150994853$

|   | X           | Y           | Z           |
|---|-------------|-------------|-------------|
| C | 2.82591400  | -1.07029900 | 0.00000100  |
| C | 3.16249200  | 0.27659100  | -0.00000100 |
| C | 2.15834100  | 1.26327700  | -0.00000400 |
| C | 0.83353400  | 0.86685600  | -0.00000200 |
| C | 0.48679100  | -0.51733600 | 0.00000200  |
| C | 1.47788200  | -1.47978700 | 0.00000300  |
| C | -0.41269100 | 1.66678600  | 0.00000500  |
| C | -1.46745300 | 0.81563600  | 0.00000800  |
| C | -0.98129700 | -0.56898000 | 0.00000400  |
| C | -2.92981700 | 0.76981700  | -0.00001000 |
| C | -3.27616800 | -0.54406200 | 0.00001000  |
| C | -2.05727700 | -1.39308000 | -0.00001300 |
| H | 3.60955700  | -1.81948000 | 0.00000200  |
| H | 4.20522600  | 0.57232200  | -0.00000400 |
| H | 2.42531800  | 2.31478700  | -0.00000400 |
| H | 1.23090600  | -2.53566200 | 0.00000600  |
| H | -0.43792300 | 2.74974100  | -0.00000100 |
| H | -3.60074100 | 1.61617600  | -0.00001300 |
| H | -4.28469800 | -0.93549100 | 0.00001700  |
| H | -2.06917000 | -2.47490300 | -0.00002300 |

$T_1$

$E_{el} = -462.121460345$

|   | X           | Y           | Z           |
|---|-------------|-------------|-------------|
| C | 2.76888500  | -1.12990700 | 0.00000200  |
| C | 3.13864200  | 0.22883900  | -0.00000100 |
| C | 2.18357000  | 1.24399500  | -0.00000400 |
| C | 0.82825600  | 0.90371900  | -0.00000400 |
| C | 0.44717300  | -0.49748200 | 0.00000000  |
| C | 1.42900200  | -1.49783900 | 0.00000400  |
| C | -0.35753400 | 1.72520600  | -0.00000900 |
| C | -1.46220200 | 0.85791200  | 0.00000800  |
| C | -0.97375400 | -0.53065400 | 0.00000000  |
| C | -2.85560800 | 0.80753800  | 0.00002900  |
| C | -3.23115300 | -0.59747800 | -0.00003500 |
| C | -2.10009800 | -1.40366900 | 0.00001100  |
| H | 3.53957000  | -1.89177800 | 0.00000400  |
| H | 4.19154600  | 0.48872100  | -0.00000300 |
| H | 2.49175800  | 2.28387200  | -0.00000800 |

|   |             |             |             |
|---|-------------|-------------|-------------|
| H | 1.14606100  | -2.54477400 | 0.00000800  |
| H | -0.36729400 | 2.80593000  | -0.00000900 |
| H | -3.54976900 | 1.63580600  | 0.00003700  |
| H | -4.25265100 | -0.95515200 | -0.00005600 |
| H | -2.09029500 | -2.48370600 | 0.00002200  |

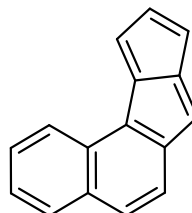

Pentaleno[1,2-*a*]naphthalene **15'**

$S_0$

$E_{el} = -615.825312168$

|   | X           | Y           | Z           |
|---|-------------|-------------|-------------|
| C | 2.09217400  | 0.68591000  | 0.00000000  |
| C | 1.76557900  | 2.06214400  | -0.00000100 |
| C | 0.44782100  | 2.48678100  | 0.00000000  |
| C | -0.57576100 | 1.53147700  | 0.00000000  |
| C | -0.29038700 | 0.15423200  | 0.00000000  |
| C | 1.04158100  | -0.30290500 | 0.00000000  |
| C | -2.04727700 | 1.72131500  | 0.00000000  |
| C | -2.63125800 | 0.50010500  | 0.00000100  |
| C | -1.59185500 | -0.53568300 | 0.00000100  |
| C | -3.93180700 | -0.17392200 | 0.00000000  |
| C | -3.67901600 | -1.50715800 | -0.00000100 |
| C | -2.21021500 | -1.74314600 | -0.00000100 |
| C | 1.40095900  | -1.68073700 | 0.00000100  |
| C | 2.71705100  | -2.06612900 | 0.00000000  |
| C | 3.75144400  | -1.09478800 | 0.00000000  |
| C | 3.44388100  | 0.24189600  | 0.00000000  |
| H | 2.57119800  | 2.78839000  | -0.00000100 |
| H | 0.21315700  | 3.54584900  | 0.00000000  |
| H | -2.53356900 | 2.68923800  | 0.00000000  |
| H | -4.90135600 | 0.30223100  | 0.00000100  |
| H | -4.41754100 | -2.29740100 | -0.00000200 |
| H | -1.76105400 | -2.72722900 | -0.00000200 |
| H | 0.61690200  | -2.42786700 | 0.00000100  |
| H | 2.97381900  | -3.11958300 | 0.00000100  |
| H | 4.78700600  | -1.41572900 | 0.00000000  |
| H | 4.23395700  | 0.98574900  | -0.00000100 |

T<sub>1</sub>

E<sub>el</sub> = -615.803467813

|   | X           | Y           | Z           |
|---|-------------|-------------|-------------|
| C | 2.06722500  | 0.67862400  | 0.00000000  |
| C | 1.72483100  | 2.07016600  | 0.00000000  |
| C | 0.41943800  | 2.50537700  | 0.00000000  |
| C | -0.62575100 | 1.56171400  | 0.00000000  |
| C | -0.32611700 | 0.14312100  | 0.00000000  |
| C | 1.03081500  | -0.31028000 | 0.00000000  |
| C | -2.04774900 | 1.76205600  | 0.00000000  |
| C | -2.63940300 | 0.49524600  | 0.00000000  |
| C | -1.56913600 | -0.52807500 | 0.00000000  |
| C | -3.86826300 | -0.17426700 | 0.00000000  |
| C | -3.57767000 | -1.57856400 | -0.00000100 |
| C | -2.19179600 | -1.80018700 | 0.00000000  |
| C | 1.39898100  | -1.67333000 | 0.00000000  |
| C | 2.72868800  | -2.05103900 | 0.00000000  |
| C | 3.74636900  | -1.08018200 | 0.00000000  |
| C | 3.41545600  | 0.26129200  | 0.00000000  |
| H | 2.53446100  | 2.79272300  | -0.00000100 |
| H | 0.19553700  | 3.56654200  | 0.00000000  |
| H | -2.54077400 | 2.72386100  | 0.00000000  |
| H | -4.85717100 | 0.26074500  | 0.00000000  |
| H | -4.32757600 | -2.35922000 | -0.00000200 |
| H | -1.71714100 | -2.76985400 | 0.00000000  |
| H | 0.62543000  | -2.43101100 | 0.00000100  |
| H | 2.98941500  | -3.10351700 | 0.00000000  |
| H | 4.78633000  | -1.38550500 | 0.00000000  |
| H | 4.19599200  | 1.01521900  | 0.00000000  |

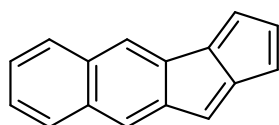

Pentaleno[1,2-*b*]naphthalene 16'

S<sub>0</sub>

E<sub>el</sub> = -615.834264240

|   | X           | Y           | Z           |
|---|-------------|-------------|-------------|
| C | -1.71308700 | -0.70296800 | 0.00000000  |
| C | -1.90918300 | 0.71495700  | 0.00000000  |
| C | -0.76690400 | 1.57988600  | 0.00000000  |
| C | 0.48915600  | 1.04548900  | 0.00000000  |
| C | 0.69119500  | -0.39310100 | 0.00000000  |
| C | -0.38091600 | -1.23533600 | 0.00000000  |
| C | 1.80777000  | 1.69899500  | 0.00000000  |
| C | 2.76731900  | 0.73850000  | 0.00000100  |
| C | 2.14042200  | -0.59154800 | 0.00000100  |
| C | 4.21117400  | 0.54517400  | 0.00000000  |
| C | 4.41981500  | -0.80157900 | -0.00000100 |

|   |             |             |             |
|---|-------------|-------------|-------------|
| C | 3.12893000  | -1.52264900 | 0.00000000  |
| C | -2.84735400 | -1.54367500 | 0.00000000  |
| C | -4.12512200 | -1.01805500 | 0.00000000  |
| C | -4.31716500 | 0.37562600  | 0.00000000  |
| C | -3.22650900 | 1.22316700  | 0.00000000  |
| H | -0.92061500 | 2.65457200  | 0.00000000  |
| H | -0.25053000 | -2.31263500 | 0.00000100  |
| H | 1.95090200  | 2.77267000  | 0.00000000  |
| H | 4.96529600  | 1.31811700  | 0.00000000  |
| H | 5.38456100  | -1.29175900 | -0.00000100 |
| H | 3.03169900  | -2.59991300 | -0.00000100 |
| H | -2.70139700 | -2.61897200 | 0.00000000  |
| H | -4.98334000 | -1.68048700 | 0.00000000  |
| H | -5.32188800 | 0.78248000  | 0.00000000  |
| H | -3.37193700 | 2.29863500  | 0.00000000  |

T<sub>1</sub>

E<sub>el</sub> = -615.800117704

|   | X           | Y           | Z           |
|---|-------------|-------------|-------------|
| C | -1.68378400 | -0.70481700 | 0.00000000  |
| C | -1.89656600 | 0.72035300  | 0.00000000  |
| C | -0.78282200 | 1.60673700  | 0.00000000  |
| C | 0.50151500  | 1.11066100  | 0.00000000  |
| C | 0.71612400  | -0.34345700 | 0.00000000  |
| C | -0.36135200 | -1.21273500 | 0.00000000  |
| C | 1.78357900  | 1.76912300  | 0.00000000  |
| C | 2.76920600  | 0.76335800  | 0.00000000  |
| C | 2.12111900  | -0.54326100 | 0.00000000  |
| C | 4.14885700  | 0.54051000  | 0.00000000  |
| C | 4.35484800  | -0.90619300 | -0.00000100 |
| C | 3.14223500  | -1.55989800 | 0.00000000  |
| C | -2.81158100 | -1.56653400 | 0.00000000  |
| C | -4.09193300 | -1.06319600 | 0.00000000  |
| C | -4.30085700 | 0.33501200  | 0.00000000  |
| C | -3.22927100 | 1.20098200  | 0.00000000  |
| H | -0.96558000 | 2.67668900  | 0.00000000  |
| H | -0.20720000 | -2.28706700 | 0.00000000  |
| H | 1.93488800  | 2.83914400  | 0.00000000  |
| H | 4.93835200  | 1.27900600  | 0.00000000  |
| H | 5.32599400  | -1.38291100 | -0.00000100 |
| H | 2.99349600  | -2.62977500 | 0.00000000  |
| H | -2.64557200 | -2.63900100 | 0.00000000  |
| H | -4.94246100 | -1.73505200 | 0.00000000  |
| H | -5.31220300 | 0.72586000  | 0.00000000  |
| H | -3.39563000 | 2.27323200  | 0.00000000  |

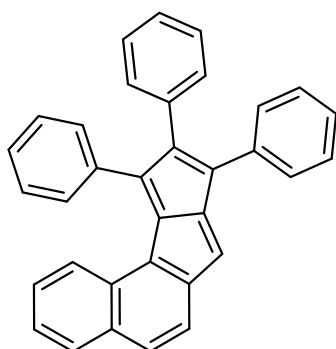

8,9,10-Triphenylpentaleno[1,2-a]naphthalene **15**

**S<sub>0</sub>**

$E_{el} = -1309.15885217$

|   | X           | Y           | Z           |
|---|-------------|-------------|-------------|
| C | -4.54343700 | -1.70919000 | 0.00451800  |
| C | -4.26085700 | -3.07641000 | 0.23276500  |
| C | -2.95875100 | -3.53000000 | 0.30942000  |
| C | -1.90822800 | -2.61017300 | 0.19393600  |
| C | -2.14102200 | -1.22974100 | 0.02315300  |
| C | -3.46646800 | -0.75485500 | -0.12501100 |
| C | -0.45627400 | -2.86620500 | 0.20035100  |
| C | 0.17818200  | -1.68229800 | 0.02829300  |
| C | -0.80079000 | -0.59924300 | -0.02031300 |
| C | 1.52759600  | -1.10822700 | 0.00466100  |
| C | 1.36576700  | 0.25401300  | -0.02508900 |
| C | -0.11017200 | 0.58034600  | 0.00096400  |
| C | -3.80246500 | 0.59423600  | -0.43169900 |
| C | -5.10954000 | 0.98961000  | -0.56657800 |
| C | -6.16612200 | 0.06007100  | -0.40137300 |
| C | -5.88456900 | -1.25367600 | -0.12672100 |
| H | -5.08882000 | -3.77059500 | 0.32751500  |
| H | -2.74944400 | -4.58419800 | 0.45642600  |
| H | -0.00998400 | -3.84349000 | 0.33324500  |
| H | -3.00967700 | 1.31455800  | -0.57033200 |
| H | -5.33681000 | 2.02244000  | -0.80598700 |
| H | -7.19424600 | 0.38886700  | -0.50349300 |
| H | -6.68766500 | -1.97508600 | -0.01581500 |
| C | -0.62063400 | 1.96347100  | 0.09003200  |
| C | -1.37816600 | 2.36687600  | 1.19951100  |
| C | -0.33763100 | 2.90551600  | -0.90957800 |
| C | -1.84564500 | 3.67469000  | 1.30311400  |
| H | -1.59700100 | 1.64828000  | 1.98108200  |
| C | -0.82006500 | 4.20788000  | -0.81252200 |
| H | 0.25333100  | 2.61139300  | -1.76887700 |
| C | -1.57183900 | 4.59814300  | 0.29539200  |
| H | -2.42684500 | 3.97023400  | 2.16946700  |
| H | -0.60311600 | 4.92039500  | -1.60046700 |
| C | 2.43425800  | 1.27259800  | -0.10268700 |
| C | 2.52467800  | 2.31493100  | 0.83316400  |

|   |             |             |             |
|---|-------------|-------------|-------------|
| C | 3.39105400  | 1.21654100  | -1.12862300 |
| C | 3.54515700  | 3.25912400  | 0.75334100  |
| H | 1.79730900  | 2.37902100  | 1.63373300  |
| C | 4.40765500  | 2.16373500  | -1.21112800 |
| H | 3.33046000  | 0.42394800  | -1.86529500 |
| C | 4.49057600  | 3.18825700  | -0.26884500 |
| H | 3.60102500  | 4.05167500  | 1.49142900  |
| H | 5.13440100  | 2.10291200  | -2.01378000 |
| H | 5.28242900  | 3.92619700  | -0.33215500 |
| C | 2.76143600  | -1.90789100 | 0.05527300  |
| C | 3.85089100  | -1.53696900 | 0.86105000  |
| C | 2.86206300  | -3.09639000 | -0.68831700 |
| C | 4.99824900  | -2.32154000 | 0.91397100  |
| H | 3.78862400  | -0.63514300 | 1.45720000  |
| C | 4.01375700  | -3.87733800 | -0.63851700 |
| H | 2.03818400  | -3.39497900 | -1.32631200 |
| C | 5.08742800  | -3.49394100 | 0.16316400  |
| H | 5.82413200  | -2.01949900 | 1.54860400  |
| H | 4.07322300  | -4.78480600 | -1.22944000 |
| H | 5.98327600  | -4.10310400 | 0.20537500  |
| H | -1.93916400 | 5.61525800  | 0.37345900  |

**T<sub>1</sub>**

$E_{el} = -1309.13771479$

|   | X           | Y           | Z           |
|---|-------------|-------------|-------------|
| C | -4.48115100 | -1.75404100 | 0.00503500  |
| C | -4.17887700 | -3.14348800 | 0.15871400  |
| C | -2.88596300 | -3.60515500 | 0.18576000  |
| C | -1.82114100 | -2.68788200 | 0.09612800  |
| C | -2.06897700 | -1.26432500 | -0.00014200 |
| C | -3.42109900 | -0.79056700 | -0.09921600 |
| C | -0.41229600 | -2.94928200 | 0.09666100  |
| C | 0.22877000  | -1.71471100 | 0.01372600  |
| C | -0.78300300 | -0.64308100 | 0.00624700  |
| C | 1.51004300  | -1.13823100 | -0.00000900 |
| C | 1.30245600  | 0.30528500  | -0.00425700 |
| C | -0.08928200 | 0.59821500  | 0.02908900  |
| C | -3.77656400 | 0.55682300  | -0.33327800 |
| C | -5.09957100 | 0.94763200  | -0.41743900 |
| C | -6.13549000 | 0.00767900  | -0.27759800 |
| C | -5.82320200 | -1.32151400 | -0.07587500 |
| H | -5.00691100 | -3.84075700 | 0.23451100  |
| H | -2.68047400 | -4.66607300 | 0.27807900  |
| H | 0.03805700  | -3.92886700 | 0.16230100  |
| H | -2.99907600 | 1.29498100  | -0.45870100 |
| H | -5.33711100 | 1.98998300  | -0.59842200 |
| H | -7.17054000 | 0.32346900  | -0.34034000 |
| H | -6.61302000 | -2.06039200 | 0.01396000  |
| C | -0.65507400 | 1.96689300  | 0.07993900  |
| C | -1.35044000 | 2.40516300  | 1.21678300  |



|   |             |             |             |   |             |             |             |
|---|-------------|-------------|-------------|---|-------------|-------------|-------------|
| C | -0.49028400 | 2.86054100  | -0.98741800 | C | -2.14073300 | -0.30435400 | -0.02566500 |
| C | -1.86517500 | 3.69767700  | 1.28413900  | C | -3.23145700 | 0.51808500  | 0.00576000  |
| H | -1.48536600 | 1.72496200  | 2.05052600  | C | -0.99861700 | -2.38053200 | -0.04513600 |
| C | -1.00972500 | 4.15156500  | -0.92244800 | C | -0.05492600 | -1.40195500 | -0.02830900 |
| H | 0.04498300  | 2.53708500  | -1.87262200 | C | -0.69342100 | -0.08832900 | -0.04119100 |
| C | -1.69705600 | 4.57580900  | 0.21397600  | C | 1.39305500  | -1.21172700 | -0.00956400 |
| H | -2.39752600 | 4.01845900  | 2.17280300  | C | 1.60353900  | 0.15065100  | 0.00236500  |
| H | -0.87625000 | 4.82674700  | -1.76047400 | C | 0.28255700  | 0.86696600  | -0.01831400 |
| C | 2.37661000  | 1.31027900  | -0.08852800 | C | -5.70067800 | 0.78326800  | 0.06008600  |
| C | 2.43194000  | 2.40382300  | 0.79176400  | C | -6.96904800 | 0.23664100  | 0.07260900  |
| C | 3.37481900  | 1.19649900  | -1.07202400 | C | -7.13851700 | -1.16059500 | 0.04847100  |
| C | 3.45193000  | 3.34567200  | 0.69443100  | C | -6.03492800 | -1.98975200 | 0.01358800  |
| H | 1.67752500  | 2.50717200  | 1.56158900  | H | -3.70290800 | -3.37986800 | -0.03873400 |
| C | 4.38369300  | 2.14824500  | -1.17797600 | H | -3.12232600 | 1.59636900  | 0.02220000  |
| H | 3.34863600  | 0.36191000  | -1.76228800 | H | -0.83769100 | -3.45091100 | -0.05179800 |
| C | 4.42927300  | 3.22504500  | -0.29277100 | H | -5.57191100 | 1.86061000  | 0.07919100  |
| H | 3.48175500  | 4.17681000  | 1.39020700  | H | -7.83793600 | 0.88450500  | 0.10111700  |
| H | 5.13720800  | 2.04751700  | -1.95120100 | H | -8.13648500 | -1.58384300 | 0.05798900  |
| H | 5.21962200  | 3.96311100  | -0.37124000 | H | -6.16290700 | -3.06735000 | -0.00428100 |
| C | 2.77493800  | -1.87203800 | 0.06533100  | C | 0.09716100  | 2.32776600  | 0.02373400  |
| C | 3.85912400  | -1.42774000 | 0.84603800  | C | 0.76697300  | 3.12268100  | 0.96782500  |
| C | 2.92018100  | -3.08867800 | -0.62951500 | C | -0.77908200 | 2.95674400  | -0.87518700 |
| C | 5.03183900  | -2.17068100 | 0.92883500  | C | 0.55287800  | 4.49691100  | 1.02014900  |
| H | 3.77199500  | -0.50563500 | 1.40623300  | H | 1.44797200  | 2.65823600  | 1.67044600  |
| C | 4.09667300  | -3.82605200 | -0.54941000 | C | -0.98334200 | 4.33316400  | -0.82908700 |
| H | 2.10774700  | -3.43906300 | -1.25519900 | H | -1.28524600 | 2.35944500  | -1.62499900 |
| C | 5.15958500  | -3.37199000 | 0.23138200  | C | -0.32045200 | 5.10856600  | 0.12154300  |
| H | 5.84851400  | -1.81226800 | 1.54584700  | H | 1.07104500  | 5.09184000  | 1.76400700  |
| H | 4.18684600  | -4.75431000 | -1.10304200 | H | -1.65667800 | 4.80102900  | -1.53898300 |
| H | 6.07635100  | -3.94704500 | 0.29570000  | C | 2.91219700  | 0.83643100  | 0.02828400  |
| H | -2.09797700 | 5.58189900  | 0.26532500  | C | 3.87213100  | 0.51285300  | 0.99989500  |

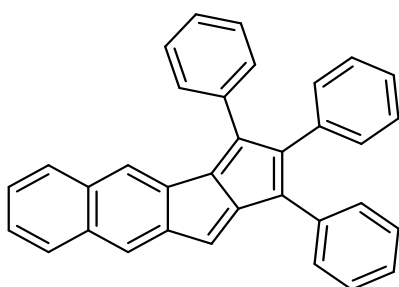

1,2,3-Triphenylpenteno[1,2-b]naphthalene **16**

$S_0$

$E_{el} = -1309.17138848$

|   | X           | Y           | Z           |
|---|-------------|-------------|-------------|
| C | -4.55202300 | -0.03859600 | 0.02346000  |
| C | -4.72548500 | -1.45953200 | 0.00102000  |
| C | -3.56974600 | -2.30243300 | -0.02912800 |
| C | -2.32168600 | -1.74582900 | -0.03963200 |

|   |             |             |             |
|---|-------------|-------------|-------------|
| C | -2.14073300 | -0.30435400 | -0.02566500 |
| C | -3.23145700 | 0.51808500  | 0.00576000  |
| C | -0.99861700 | -2.38053200 | -0.04513600 |
| C | -0.05492600 | -1.40195500 | -0.02830900 |
| C | -0.69342100 | -0.08832900 | -0.04119100 |
| C | 1.39305500  | -1.21172700 | -0.00956400 |
| C | 1.60353900  | 0.15065100  | 0.00236500  |
| C | 0.28255700  | 0.86696600  | -0.01831400 |
| C | -5.70067800 | 0.78326800  | 0.06008600  |
| C | -6.96904800 | 0.23664100  | 0.07260900  |
| C | -7.13851700 | -1.16059500 | 0.04847100  |
| C | -6.03492800 | -1.98975200 | 0.01358800  |
| H | -3.70290800 | -3.37986800 | -0.03873400 |
| H | -3.12232600 | 1.59636900  | 0.02220000  |
| H | -0.83769100 | -3.45091100 | -0.05179800 |
| H | -5.57191100 | 1.86061000  | 0.07919100  |
| H | -7.83793600 | 0.88450500  | 0.10111700  |
| H | -8.13648500 | -1.58384300 | 0.05798900  |
| H | -6.16290700 | -3.06735000 | -0.00428100 |
| C | 0.09716100  | 2.32776600  | 0.02373400  |
| C | 0.76697300  | 3.12268100  | 0.96782500  |
| C | -0.77908200 | 2.95674400  | -0.87518700 |
| C | 0.55287800  | 4.49691100  | 1.02014900  |
| H | 1.44797200  | 2.65823600  | 1.67044600  |
| C | -0.98334200 | 4.33316400  | -0.82908700 |
| H | -1.28524600 | 2.35944500  | -1.62499900 |
| C | -0.32045200 | 5.10856600  | 0.12154300  |
| H | 1.07104500  | 5.09184000  | 1.76400700  |
| H | -1.65667800 | 4.80102900  | -1.53898300 |
| C | 2.91219700  | 0.83643100  | 0.02828400  |
| C | 3.87213100  | 0.51285300  | 0.99989500  |
| C | 3.22810900  | 1.82560300  | -0.91639900 |
| C | 5.10836500  | 1.15223300  | 1.02210400  |
| H | 3.64046500  | -0.24221800 | 1.74176600  |
| C | 4.46798800  | 2.45880300  | -0.89846100 |
| H | 2.50070300  | 2.09133700  | -1.67448600 |
| C | 5.41259700  | 2.12611500  | 0.07143000  |
| H | 5.83447900  | 0.89069200  | 1.78391600  |
| H | 4.69555400  | 3.21427100  | -1.64238200 |
| H | 6.37598300  | 2.62330500  | 0.08824300  |
| C | 2.37191500  | -2.31108700 | -0.06478000 |
| C | 2.19603500  | -3.45407600 | 0.73352100  |
| C | 3.47808500  | -2.27229300 | -0.92935300 |
| C | 3.09801500  | -4.51351800 | 0.67732800  |
| H | 1.35778900  | -3.49908000 | 1.41957200  |
| C | 4.37685300  | -3.33271800 | -0.98656900 |
| H | 3.62364200  | -1.40925900 | -1.56719600 |
| C | 4.19303100  | -4.45815100 | -0.18317500 |
| H | 2.94746000  | -5.38121000 | 1.31037400  |
| H | 5.22072500  | -3.28282800 | -1.66590200 |

|   |             |             |             |
|---|-------------|-------------|-------------|
| H | 4.89473500  | -5.28330900 | -0.22908600 |
| H | -0.48051000 | 6.18020500  | 0.15967700  |

**T<sub>1</sub>**

E<sub>el</sub> = -1309.14076183

|   | X           | Y           | Z           |
|---|-------------|-------------|-------------|
| C | -4.48958500 | -0.07824600 | 0.03342200  |
| C | -4.68015100 | -1.50473900 | 0.02486600  |
| C | -3.54976300 | -2.36925000 | 0.00920700  |
| C | -2.27589100 | -1.84747400 | -0.00004200 |
| C | -2.08283600 | -0.39394200 | -0.00412000 |
| C | -3.17432900 | 0.45431700  | 0.01639200  |
| C | -0.98390400 | -2.48789200 | 0.00339600  |
| C | -0.01492400 | -1.47173200 | 0.01579100  |
| C | -0.66996800 | -0.18183200 | -0.01780600 |
| C | 1.38046100  | -1.25251400 | -0.00011300 |
| C | 1.57307500  | 0.22115700  | -0.01123200 |
| C | 0.32856600  | 0.85393500  | -0.03444300 |
| C | -5.63008400 | 0.76477800  | 0.05815300  |
| C | -6.90301300 | 0.24080000  | 0.07119400  |
| C | -7.09008500 | -1.15974300 | 0.06035700  |
| C | -6.00434800 | -2.00804500 | 0.03802700  |
| H | -3.71041300 | -3.44285600 | 0.00983300  |
| H | -3.04182200 | 1.53002800  | 0.02760300  |
| H | -0.82368500 | -3.55592800 | -0.00372400 |
| H | -5.48106200 | 1.83969800  | 0.06708900  |
| H | -7.76371900 | 0.89941900  | 0.09010000  |
| H | -8.09496300 | -1.56690800 | 0.07058800  |
| H | -6.15296900 | -3.08296700 | 0.03104900  |
| C | 0.04901900  | 2.30460400  | -0.00833000 |
| C | 0.59209400  | 3.13741000  | 0.98152900  |
| C | -0.79065100 | 2.88033400  | -0.97484700 |
| C | 0.30656000  | 4.49982400  | 1.00199600  |
| H | 1.23434600  | 2.70987200  | 1.74212400  |
| C | -1.07070500 | 4.24456600  | -0.95763200 |
| H | -1.21077000 | 2.25399400  | -1.75407200 |
| C | -0.52394100 | 5.06023300  | 0.03214200  |
| H | 0.73138900  | 5.12462200  | 1.77990300  |
| H | -1.71333300 | 4.67087300  | -1.72027600 |
| C | 2.87875700  | 0.90334300  | 0.04672300  |
| C | 3.82825000  | 0.55396900  | 1.02224200  |
| C | 3.20278600  | 1.92528200  | -0.86087800 |
| C | 5.05292400  | 1.21104900  | 1.09288300  |
| H | 3.59711200  | -0.23006400 | 1.73352300  |
| C | 4.43253000  | 2.57360800  | -0.79558800 |
| H | 2.48709800  | 2.20261500  | -1.62542000 |
| C | 5.36178600  | 2.22180700  | 0.18306800  |
| H | 5.76776000  | 0.93242500  | 1.85920800  |
| H | 4.66578000  | 3.35463900  | -1.51075700 |
| H | 6.31821600  | 2.72975700  | 0.23538200  |

|   |             |             |             |
|---|-------------|-------------|-------------|
| C | 2.40344800  | -2.28569500 | -0.07857200 |
| C | 2.20403400  | -3.52430400 | 0.56820300  |
| C | 3.58958500  | -2.11730900 | -0.82312400 |
| C | 3.14758700  | -4.53998800 | 0.48081900  |
| H | 1.31241600  | -3.66958500 | 1.1658130   |
| C | 4.52466600  | -3.14143100 | -0.91781300 |
| H | 3.76398900  | -1.18814700 | -1.34903000 |
| C | 4.31340100  | -4.35582800 | -0.26449800 |
| H | 2.97686500  | -5.47729900 | 0.99888100  |
| H | 5.42169500  | -2.99212200 | -1.50846800 |
| H | 5.04768900  | -5.15015200 | -0.33584300 |
| H | -0.74371800 | 6.12178000  | 0.04827100  |

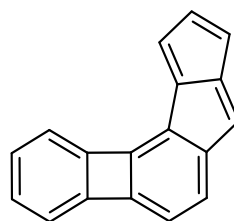

Pentaleno[1,2-a]biphenylene **9**

**S<sub>0</sub>**

E<sub>el</sub> = -691.988779582

|   | X           | Y           | Z           |
|---|-------------|-------------|-------------|
| C | 3.74013300  | -1.92224500 | 0.00000000  |
| C | 4.50484100  | -0.75828400 | 0.00000300  |
| C | 3.91322300  | 0.52575400  | -0.00000400 |
| C | 2.53773600  | 0.55238800  | -0.00000300 |
| C | 1.75618300  | -0.63772200 | 0.00000100  |
| C | 2.32667300  | -1.88953500 | 0.00000200  |
| C | 1.29308400  | 1.38457000  | -0.00000100 |
| C | 0.49966400  | 0.17457700  | 0.00000000  |
| C | 0.75070700  | 2.63562700  | 0.00000000  |
| C | -0.68117100 | 2.70540800  | 0.00000100  |
| C | -1.44541000 | 1.55986000  | 0.00000000  |
| C | -0.85917900 | 0.22088800  | 0.00000000  |
| C | -2.90497200 | 1.40936500  | 0.00000300  |
| C | -3.21140800 | 0.08338600  | 0.00000000  |
| C | -1.97760200 | -0.71308600 | 0.00000000  |
| C | -4.33262500 | -0.84441500 | -0.00000300 |
| C | -3.79876500 | -2.09986300 | 0.00000200  |
| C | -2.32404800 | -2.02825000 | -0.00000200 |
| H | 4.24534300  | -2.88158400 | -0.00000600 |
| H | 5.58589300  | -0.84094300 | 0.00000900  |
| H | 4.52546100  | 1.41983700  | -0.00000100 |
| H | 1.74910800  | -2.80621800 | -0.00000300 |
| H | 1.34410200  | 3.54178800  | -0.00000200 |
| H | -1.16405800 | 3.67689200  | 0.00000300  |
| H | -3.59734700 | 2.24253400  | 0.00000300  |

|   |             |             |             |
|---|-------------|-------------|-------------|
| H | -5.38172400 | -0.58781300 | -0.00000500 |
| H | -4.35919000 | -3.02539500 | 0.00000500  |
| H | -1.66997200 | -2.88962900 | -0.00000300 |

**T<sub>1</sub>**

E<sub>el</sub> = -691.955175113

|   | X           | Y           | Z           |
|---|-------------|-------------|-------------|
| C | 3.72088700  | -1.91280700 | 0.00000300  |
| C | 4.48327100  | -0.75036300 | 0.00004000  |
| C | 3.89260700  | 0.53911000  | -0.00011300 |
| C | 2.52011400  | 0.56761700  | -0.00007800 |
| C | 1.73875400  | -0.62526500 | 0.00007000  |
| C | 2.30398300  | -1.87650500 | 0.00009200  |
| C | 1.26685000  | 1.39329600  | 0.00000100  |
| C | 0.48727400  | 0.19451700  | 0.00001400  |
| C | 0.70861100  | 2.65145000  | 0.00002900  |
| C | -0.70729600 | 2.73418200  | 0.00004800  |
| C | -1.49880100 | 1.58742200  | -0.00002800 |
| C | -0.89009300 | 0.23636500  | -0.00001700 |
| C | -2.92280000 | 1.44045400  | -0.00002500 |
| C | -3.21240300 | 0.05885900  | 0.00000500  |
| C | -1.96038300 | -0.69421400 | -0.00002200 |
| C | -4.25242000 | -0.86883500 | 0.00004600  |
| C | -3.64493600 | -2.20060900 | -0.00003100 |
| C | -2.27075600 | -2.09785800 | -0.00003800 |
| H | 4.22426700  | -2.87294700 | -0.00016300 |
| H | 5.56454000  | -0.83247400 | 0.00018800  |
| H | 4.50777900  | 1.43107300  | -0.00004700 |
| H | 1.72434700  | -2.79200200 | -0.00000300 |
| H | 1.30659600  | 3.55528400  | -0.00002200 |
| H | -1.18041100 | 3.71018300  | 0.00008700  |
| H | -3.63172600 | 2.25641600  | -0.00001400 |
| H | -5.31560200 | -0.67313500 | 0.00008600  |
| H | -4.20641500 | -3.12545000 | -0.00003300 |
| H | -1.56815700 | -2.91784800 | -0.00005100 |

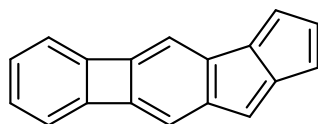

Pentaleno[1,2-*b*]biphenylene **14'**

**S<sub>0</sub>**

E<sub>el</sub> = -691.981926944

|   | X          | Y           | Z           |
|---|------------|-------------|-------------|
| C | 4.87332600 | -0.97965000 | 0.00000000  |
| C | 5.01947500 | 0.39858700  | 0.00000300  |
| C | 3.89841400 | 1.27319200  | -0.00000400 |
| C | 2.66938800 | 0.66840000  | -0.00000300 |
| C | 2.51940100 | -0.74683300 | 0.00000200  |

|   |             |             |             |
|---|-------------|-------------|-------------|
| C | 3.59296300  | -1.59761900 | 0.00000400  |
| C | 1.16914300  | 0.82446100  | -0.00000100 |
| C | 1.02047500  | -0.58473600 | 0.00000000  |
| C | 0.09031900  | 1.68774400  | -0.00000100 |
| C | -1.16921000 | 1.06369400  | 0.00000000  |
| C | -1.31820600 | -0.35295300 | 0.00000000  |
| C | -0.21153100 | -1.21474700 | 0.00000000  |
| C | -2.51557600 | 1.67746400  | 0.00000100  |
| C | -3.44380300 | 0.68849600  | 0.00000100  |
| C | -2.76516600 | -0.60773800 | -0.00000100 |
| C | -4.88537700 | 0.43314100  | 0.00000400  |
| C | -5.04266000 | -0.91620300 | -0.00000100 |
| C | -3.71131400 | -1.57915700 | -0.00000200 |
| H | 5.75940600  | -1.60442300 | -0.00000700 |
| H | 6.01728100  | 0.82284800  | 0.00001000  |
| H | 4.03440000  | 2.34831300  | 0.00000000  |
| H | 3.49848300  | -2.67719800 | -0.00000100 |
| H | 0.18881800  | 2.76751300  | -0.00000100 |
| H | -0.32879400 | -2.29211100 | -0.00000100 |
| H | -2.68960600 | 2.74680200  | 0.00000200  |
| H | -5.66977600 | 1.17578500  | 0.00000600  |
| H | -5.98380200 | -1.44903600 | -0.00000200 |
| H | -3.56676200 | -2.65175700 | -0.00000300 |

**T<sub>1</sub>**

E<sub>el</sub> = -691.963392464

|   | X           | Y           | Z           |
|---|-------------|-------------|-------------|
| C | 4.83215200  | -0.98791000 | 0.00000000  |
| C | 4.98065300  | 0.40026900  | 0.00000200  |
| C | 3.86906900  | 1.26909700  | 0.00000000  |
| C | 2.63231000  | 0.66026100  | -0.00000100 |
| C | 2.48008700  | -0.75738300 | 0.00000000  |
| C | 3.56452700  | -1.60853600 | 0.00000000  |
| C | 1.15586400  | 0.83287900  | -0.00000100 |
| C | 0.99818300  | -0.61469600 | -0.00000100 |
| C | 0.10504500  | 1.71055300  | -0.00000200 |
| C | -1.17904500 | 1.10947600  | 0.00000000  |
| C | -1.34049900 | -0.35559700 | 0.00000000  |
| C | -0.21941600 | -1.23057300 | -0.00000200 |
| C | -2.46861400 | 1.72639300  | 0.00000100  |
| C | -3.42593400 | 0.70610500  | 0.00000000  |
| C | -2.72898300 | -0.59762400 | 0.00000000  |
| C | -4.80689100 | 0.45075100  | -0.00000100 |
| C | -4.96391400 | -0.96389600 | 0.00000300  |
| C | -3.70598300 | -1.60982600 | 0.00000100  |
| H | 5.72160100  | -1.60819900 | -0.00000200 |
| H | 5.98007100  | 0.82037200  | 0.00000600  |
| H | 4.00215700  | 2.34440900  | 0.00000200  |
| H | 3.47385500  | -2.68813000 | -0.00000200 |
| H | 0.22171000  | 2.78826900  | -0.00000200 |

|   |             |             |             |
|---|-------------|-------------|-------------|
| H | -0.34992500 | -2.30650200 | -0.00000300 |
| H | -2.64298600 | 2.79336500  | 0.00000100  |
| H | -5.61052100 | 1.17272600  | -0.00000200 |
| H | -5.91777000 | -1.47590000 | 0.00000400  |
| H | -3.54985500 | -2.67886100 | 0.00000000  |

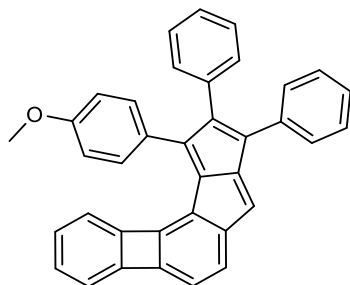

1-(4-Methoxyphenyl)-2,3-diphenylpentaleno[1,2-a]biphenylene

**9**

**S<sub>0</sub>**

E<sub>el</sub> = -1460.57281945

|   | X           | Y           | Z           |
|---|-------------|-------------|-------------|
| C | 5.80238600  | 0.03313300  | -0.46915500 |
| C | 6.55917100  | -1.13123300 | -0.36899000 |
| C | 5.95845700  | -2.39523300 | -0.16969700 |
| C | 4.58657200  | -2.39783200 | -0.07173600 |
| C | 3.81286800  | -1.20643600 | -0.15833300 |
| C | 4.39162300  | 0.02379700  | -0.36938700 |
| C | 3.34299100  | -3.21100900 | 0.08166100  |
| C | 2.55025700  | -2.00238100 | 0.01020900  |
| C | 2.81165900  | -4.46145500 | 0.20421800  |
| C | 1.38531000  | -4.53507300 | 0.24890600  |
| C | 0.61630900  | -3.39309000 | 0.18254300  |
| C | 1.18797800  | -2.04745300 | 0.08467800  |
| C | -0.83862800 | -3.26937000 | 0.15555000  |
| C | -1.15983500 | -1.95078500 | 0.04264500  |
| C | 0.04761700  | -1.13339500 | 0.04625000  |
| C | -2.31997200 | -1.06768800 | -0.01365400 |
| C | -1.82501800 | 0.21928000  | -0.02901400 |
| C | -0.32547600 | 0.18439500  | 0.02917600  |
| H | 6.31089700  | 0.97719200  | -0.63062800 |
| H | 7.63835000  | -1.06625900 | -0.45257500 |
| H | 6.56039500  | -3.29413800 | -0.10588000 |
| H | 3.82205900  | 0.93943300  | -0.45381200 |
| H | 3.41335700  | -5.36092000 | 0.25169300  |
| H | 0.90299600  | -5.50395800 | 0.32476800  |
| H | -1.52026800 | -4.10838500 | 0.21302800  |
| C | 0.53369500  | 1.37605300  | 0.10011700  |
| C | 1.50681300  | 1.49408300  | 1.10913800  |
| C | 0.39695300  | 2.44185200  | -0.79809200 |
| C | 2.29503200  | 2.62894500  | 1.22162900  |
| H | 1.62660600  | 0.68942800  | 1.82551100  |

|   |             |             |             |
|---|-------------|-------------|-------------|
| C | 1.19858300  | 3.57824600  | -0.71144500 |
| H | -0.34160500 | 2.38388700  | -1.58831700 |
| C | 2.14919100  | 3.68034200  | 0.30886700  |
| H | 3.03282600  | 2.72197700  | 2.00958300  |
| H | 1.06730200  | 4.37188500  | -1.43446500 |
| C | -2.62348100 | 1.46256300  | -0.08651700 |
| C | -3.55549100 | 1.66672900  | -1.11582300 |
| C | -2.47603900 | 2.46510200  | 0.88496300  |
| C | -4.31981000 | 2.82931600  | -1.16764600 |
| H | -3.67645100 | 0.90600800  | -1.87829700 |
| C | -3.24589300 | 3.62438700  | 0.83681400  |
| H | -1.76140800 | 2.32858000  | 1.68811900  |
| C | -4.17054200 | 3.81211300  | -0.18975100 |
| H | -5.03256100 | 2.96755400  | -1.97328800 |
| H | -3.12311600 | 4.38204200  | 1.60303900  |
| H | -4.76788600 | 4.71621500  | -0.22829600 |
| C | -3.71607100 | -1.53506500 | 0.01242600  |
| C | -4.68565100 | -0.92437400 | 0.82498400  |
| C | -4.10452400 | -2.64230600 | -0.76120400 |
| C | -5.99268800 | -1.39993100 | 0.85723900  |
| H | -4.40609800 | -0.08035700 | 1.44311600  |
| C | -5.41392300 | -3.11522100 | -0.73034000 |
| H | -3.37682300 | -3.11925100 | -1.40783900 |
| C | -6.36484000 | -2.49621700 | 0.07915200  |
| H | -6.72237800 | -0.91631000 | 1.49743600  |
| H | -5.69230700 | -3.96563900 | -1.34326800 |
| H | -7.38407400 | -2.86487700 | 0.10557400  |
| O | 2.97211800  | 4.75217500  | 0.49685700  |
| C | 2.85767600  | 5.86238100  | -0.38408600 |
| H | 1.85813000  | 6.30777700  | -0.33769900 |
| H | 3.59266800  | 6.58925200  | -0.04237400 |
| H | 3.08290300  | 5.57843200  | -1.41775100 |

**T<sub>1</sub>**

E<sub>el</sub> = -1460.53577054

|   | X           | Y           | Z           |
|---|-------------|-------------|-------------|
| C | 5.68469300  | -0.06181600 | -0.33725200 |
| C | 6.42589200  | -1.23715200 | -0.28973400 |
| C | 5.81128400  | -2.50686500 | -0.15638000 |
| C | 4.44047700  | -2.50075300 | -0.06824200 |
| C | 3.68146000  | -1.29521500 | -0.10434700 |
| C | 4.27065000  | -0.06264500 | -0.24826400 |
| C | 3.18079200  | -3.30034900 | 0.03796100  |
| C | 2.41265700  | -2.08870600 | 0.01483100  |
| C | 2.61978000  | -4.55357400 | 0.09136100  |
| C | 1.20435400  | -4.62254300 | 0.11352900  |
| C | 0.42690800  | -3.46815500 | 0.08557900  |
| C | 1.03493300  | -2.11820600 | 0.05782900  |
| C | -0.99677800 | -3.32628100 | 0.05647200  |
| C | -1.28881000 | -1.95179700 | 0.00424200  |

|   |             |             |             |
|---|-------------|-------------|-------------|
| C | -0.05458300 | -1.19144300 | 0.04906500  |
| C | -2.36529500 | -1.04530900 | -0.01222100 |
| C | -1.76318700 | 0.31592900  | 0.01448200  |
| C | -0.37159000 | 0.20999900  | 0.07532800  |
| H | 6.20383500  | 0.88384700  | -0.44582400 |
| H | 7.50652300  | -1.18045100 | -0.36154300 |
| H | 6.40563500  | -3.41263200 | -0.13274200 |
| H | 3.70969000  | 0.86107500  | -0.28943100 |
| H | 3.21361900  | -5.46001800 | 0.10215900  |
| H | 0.71800700  | -5.59174500 | 0.14052900  |
| H | -1.69897400 | -4.14714700 | 0.07273700  |
| C | 0.59188300  | 1.33156800  | 0.13421400  |
| C | 1.40606200  | 1.51403700  | 1.26497000  |
| C | 0.69406600  | 2.26759000  | -0.89820900 |
| C | 2.26520300  | 2.59790700  | 1.36716500  |
| H | 1.34914300  | 0.80343200  | 2.08218600  |
| C | 1.56401000  | 3.35590800  | -0.81689500 |
| H | 0.08142200  | 2.15039000  | -1.78452300 |
| C | 2.34959300  | 3.52969100  | 0.32542600  |
| H | 2.88407900  | 2.74132300  | 2.24485000  |
| H | 1.61328600  | 4.05438400  | -1.64147600 |
| C | -2.52187300 | 1.57578400  | -0.07756000 |
| C | -3.49170400 | 1.75315400  | -1.07966700 |
| C | -2.28965200 | 2.63496100  | 0.81596800  |
| C | -4.19323600 | 2.94973900  | -1.19086800 |
| H | -3.68557600 | 0.95003900  | -1.78069500 |
| C | -3.00201000 | 3.82587100  | 0.71139800  |
| H | -1.55356100 | 2.51614000  | 1.60147000  |
| C | -3.95423800 | 3.99075000  | -0.29425900 |
| H | -4.92937400 | 3.06839900  | -1.97827700 |
| H | -2.81345100 | 4.62662300  | 1.41797000  |
| H | -4.50625400 | 4.92027000  | -0.37690900 |
| C | -3.77774500 | -1.39736200 | 0.03483400  |
| C | -4.71862400 | -0.63900400 | 0.76199700  |
| C | -4.23687000 | -2.55894700 | -0.62216400 |
| C | -6.05042200 | -1.03128100 | 0.83281100  |
| H | -4.39593900 | 0.24649500  | 1.29319500  |
| C | -5.57129400 | -2.93989200 | -0.55847800 |
| H | -3.53832500 | -3.14400500 | -1.20790600 |
| C | -6.48647500 | -2.17959500 | 0.17153400  |
| H | -6.75143300 | -0.43895300 | 1.41043500  |
| H | -5.90123800 | -3.82963500 | -1.08349300 |
| H | -7.52704300 | -2.47909400 | 0.22423800  |
| O | 3.22432600  | 4.56056700  | 0.51675500  |
| C | 3.34457100  | 5.54736000  | -0.49914600 |
| H | 2.39233600  | 6.06001500  | -0.67321600 |
| H | 4.07794600  | 6.26368600  | -0.13240800 |
| H | 3.70174200  | 5.11287200  | -1.43922600 |

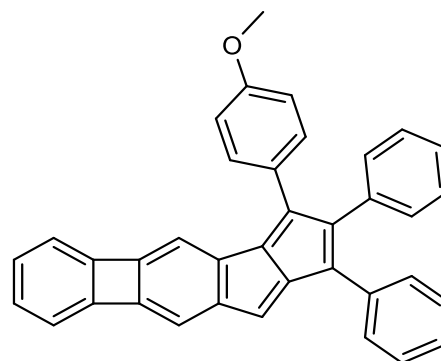

3-(4-Methoxyphenyl)-1,2-diphenylpenteno[1,2-*b*]biphenylene **14**

$S_0$

$E_{el} = -1460.56798383$

|   | X           | Y           | Z           |
|---|-------------|-------------|-------------|
| C | 7.83086000  | -0.16510500 | 0.14468800  |
| C | 7.97799800  | -1.54171100 | 0.07507100  |
| C | 6.85775500  | -2.41427100 | 0.00265000  |
| C | 5.62808200  | -1.80998100 | 0.00556000  |
| C | 5.47690300  | -0.39623700 | 0.07637100  |
| C | 6.55026200  | 0.45240200  | 0.14706800  |
| C | 4.12925300  | -1.96546400 | -0.03612600 |
| C | 3.97884900  | -0.55693500 | 0.03225000  |
| C | 3.05114200  | -2.82438200 | -0.09302600 |
| C | 1.78972200  | -2.19967100 | -0.08574900 |
| C | 1.63619400  | -0.78047700 | -0.03088100 |
| C | 2.75030000  | 0.07576200  | 0.03473900  |
| C | 0.45390500  | -2.81598100 | -0.10433200 |
| C | -0.47556500 | -1.82436600 | -0.05726000 |
| C | 0.18877500  | -0.53411200 | -0.03802400 |
| C | -1.92619900 | -1.60108100 | -0.02490800 |
| C | -2.11128300 | -0.23994100 | 0.02482100  |
| C | -0.76439900 | 0.44549800  | 0.01133500  |
| H | 8.71621200  | 0.45848900  | 0.19926600  |
| H | 8.97580900  | -1.96619900 | 0.07642300  |
| H | 6.99465800  | -3.48803700 | -0.05043700 |
| H | 6.45524800  | 1.53059700  | 0.20293200  |
| H | 3.14696700  | -3.90370000 | -0.13514900 |
| H | 2.63878900  | 1.15099000  | 0.09140500  |
| H | 0.28022600  | -3.88393600 | -0.13922100 |
| C | -0.55338300 | 1.89736600  | 0.06160100  |
| C | -1.23700300 | 2.71397500  | 0.98386600  |
| C | 0.35786200  | 2.51640400  | -0.80291600 |
| C | -0.99888900 | 4.07540100  | 1.05015800  |
| H | -1.94919900 | 2.26924000  | 1.66749700  |
| C | 0.59336500  | 3.88968100  | -0.76018200 |
| H | 0.87599800  | 1.91722100  | -1.54264000 |
| C | -0.08392900 | 4.67696200  | 0.17571700  |
| H | -1.51393000 | 4.69886000  | 1.77097300  |
| H | 1.29368900  | 4.32799300  | -1.45843800 |

|   |             |             |             |   |             |             |             |
|---|-------------|-------------|-------------|---|-------------|-------------|-------------|
| C | -3.40299500 | 0.47575300  | 0.07429200  | H | 8.88079000  | -2.07773300 | 0.08332000  |
| C | -4.35485900 | 0.17024200  | 1.05997200  | H | 6.88585300  | -3.57689800 | -0.03246300 |
| C | -3.71298600 | 1.47581000  | -0.86129400 | H | 6.41104000  | 1.45504000  | 0.19179900  |
| C | -5.57697300 | 0.83538900  | 1.10350300  | H | 3.09505000  | -3.97293200 | -0.11137600 |
| H | -4.12756700 | -0.59229600 | 1.79569400  | H | 2.58932000  | 1.11888800  | 0.08967200  |
| C | -4.93751600 | 2.13737900  | -0.82007000 | H | 0.24014300  | -3.94782700 | -0.12148100 |
| H | -2.99260700 | 1.72752300  | -1.63089900 | C | -0.51206600 | 1.91345100  | 0.05882400  |
| C | -5.87445600 | 1.82084700  | 0.16262800  | C | -1.08828000 | 2.74094900  | 1.04091600  |
| H | -6.29680400 | 0.58580000  | 1.87527600  | C | 0.35697700  | 2.51267700  | -0.86010300 |
| H | -5.15982400 | 2.90155900  | -1.55674000 | C | -0.80497100 | 4.09528500  | 1.09930200  |
| H | -6.82609200 | 2.33928300  | 0.19693400  | H | -1.75858500 | 2.30967300  | 1.77461000  |
| C | -2.92663700 | -2.67834700 | -0.09923400 | C | 0.64666800  | 3.87736800  | -0.81879000 |
| C | -2.75149000 | -3.85602900 | 0.64744700  | H | 0.80406400  | 1.90639800  | -1.64006400 |
| C | -4.05525700 | -2.58299900 | -0.92999300 | C | 0.06374400  | 4.67692300  | 0.16723400  |
| C | -3.67736700 | -4.89349400 | 0.57638400  | H | -1.24414800 | 4.72583700  | 1.86316400  |
| H | -1.89481400 | -3.94509900 | 1.30552700  | H | 1.31513600  | 4.29795400  | -1.55824000 |
| C | -4.97625500 | -3.62285900 | -1.00422700 | C | -3.36048300 | 0.53876800  | 0.08094900  |
| H | -4.20056000 | -1.69263600 | -1.52882200 | C | -4.32994600 | 0.17199200  | 1.03023000  |
| C | -4.79415600 | -4.78222200 | -0.25010200 | C | -3.65236500 | 1.59985600  | -0.79274300 |
| H | -3.52767900 | -5.78852200 | 1.17031300  | C | -5.54368500 | 0.84765700  | 1.10704300  |
| H | -5.83667600 | -3.53001100 | -1.65774900 | H | -4.12175400 | -0.64096000 | 1.71537000  |
| H | -5.51383000 | -5.59097500 | -0.30839000 | C | -4.87307600 | 2.26444900  | -0.72394900 |
| O | 0.07005400  | 6.02345600  | 0.31093100  | H | -2.92012800 | 1.89394900  | -1.53480800 |
| C | 0.98392100  | 6.69666000  | -0.54583200 | C | -5.82239600 | 1.89417400  | 0.22820600  |
| H | 0.94225100  | 7.74568900  | -0.25805500 | H | -6.27406500 | 0.55537400  | 1.85333800  |
| H | 2.00509300  | 6.32411500  | -0.41196800 | H | -5.08260100 | 3.07444700  | -1.41378000 |
| H | 0.69288900  | 6.59719100  | -1.59698000 | H | -6.77068600 | 2.41673700  | 0.28518100  |

**T<sub>1</sub>**

E<sub>el</sub> = -1460.54934663

|   | X           | Y           | Z           |   |             |             |             |
|---|-------------|-------------|-------------|---|-------------|-------------|-------------|
| C | 7.75255200  | -0.25894300 | 0.14183600  | H | -1.93952200 | -3.99472800 | 1.22209900  |
| C | 7.88625700  | -1.64615800 | 0.07989800  | C | -5.05634400 | -3.48394800 | -1.00336600 |
| C | 6.76448800  | -2.50108800 | 0.01407200  | H | -4.23705600 | -1.56008200 | -1.46884500 |
| C | 5.53529600  | -1.87908100 | 0.01421800  | C | -4.89408900 | -4.68025000 | -0.30451100 |
| C | 5.39789500  | -0.46107900 | 0.07652400  | H | -3.62766800 | -5.78216200 | 1.04401900  |
| C | 6.49069100  | 0.37560300  | 0.14194000  | H | -5.92733100 | -3.33712500 | -1.63267800 |
| C | 4.05497000  | -2.03226900 | -0.02420100 | H | -5.63978800 | -5.46361300 | -0.37952100 |
| C | 3.91302300  | -0.58863700 | 0.03627100  | O | 0.27459300  | 6.01870400  | 0.30419700  |
| C | 2.99301200  | -2.89425000 | -0.07391100 | C | 1.14538600  | 6.66654700  | -0.61264100 |
| C | 1.71600500  | -2.27659600 | -0.06577300 | H | 1.16264000  | 7.71433200  | -0.31711800 |
| C | 1.56881000  | -0.81464000 | -0.01818900 | H | 2.16037000  | 6.25785700  | -0.55758700 |
| C | 2.70333000  | 0.04357200  | 0.03871300  | H | 0.77557800  | 6.58619000  | -1.64073000 |
| C | 0.42196100  | -2.88342000 | -0.08639800 |   |             |             |             |
| C | -0.52341400 | -1.85499400 | -0.04244900 |   |             |             |             |
| C | 0.17656300  | -0.56473600 | -0.03015900 |   |             |             |             |
| C | -1.91218700 | -1.61141200 | -0.02491800 |   |             |             |             |
| C | -2.07097500 | -0.17032900 | 0.01109700  |   |             |             |             |
| C | -0.78796600 | 0.46684400  | -0.00133400 |   |             |             |             |
| H | 8.64820200  | 0.35035900  | 0.19195900  |   |             |             |             |

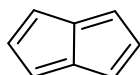

Pentalene

$S_0$

$E_{el} = -308.451673$

|   | X         | Y         | Z         |
|---|-----------|-----------|-----------|
| C | -2.169985 | 0.061221  | -0.000029 |
| C | -1.222941 | 1.219852  | 0.000015  |
| C | -1.465903 | -1.095147 | 0.000088  |
| C | -0.038037 | -0.727960 | -0.000005 |
| C | 0.038127  | 0.727883  | -0.000009 |
| C | 1.222999  | -1.219856 | -0.000076 |
| C | 2.169946  | -0.061138 | 0.000069  |
| C | 1.465788  | 1.095123  | -0.000060 |
| H | -1.870638 | -2.096847 | 0.000123  |
| H | 1.532637  | -2.257390 | -0.000060 |
| H | 3.246732  | -0.157946 | 0.000141  |
| H | 1.870626  | 2.096797  | -0.000080 |
| H | -3.246722 | 0.158199  | -0.000078 |
| H | -1.532600 | 2.257328  | -0.000005 |

$T_1$

$E_{el} = -308.437801$

|   | X         | Y         | Z         |
|---|-----------|-----------|-----------|
| C | -2.143798 | 0.000838  | -0.000016 |
| C | -1.337147 | 1.170908  | -0.000021 |
| C | -1.337537 | -1.171049 | 0.000017  |
| C | -0.000314 | -0.743478 | 0.000014  |
| C | 0.000389  | 0.742847  | -0.000009 |
| C | 1.337051  | -1.170959 | 0.000025  |
| C | 2.143775  | 0.000064  | -0.000002 |
| C | 1.337690  | 1.170744  | -0.000008 |
| H | -1.707244 | -2.185915 | 0.000035  |
| H | 1.706053  | -2.186186 | 0.000045  |
| H | 3.226396  | -0.000463 | -0.000003 |
| H | 1.705812  | 2.186226  | -0.000019 |
| H | -3.226420 | 0.000399  | -0.000023 |
| H | -1.705254 | 2.186458  | -0.000036 |

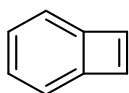

Benzocyclobutadiene

$S_0$

$E_{el} = -308.441997$

|   | X         | Y         | Z         |
|---|-----------|-----------|-----------|
| C | -1.844033 | -0.688296 | -0.000148 |
| C | -1.844060 | 0.688246  | 0.000145  |
| C | -0.623397 | 1.443311  | 0.000276  |
| C | 0.521988  | 0.711262  | 0.000068  |
| C | 0.521989  | -0.711152 | -0.000066 |
| C | -0.623352 | -1.443297 | -0.000274 |
| C | 2.046794  | 0.675032  | -0.000432 |
| C | 2.046669  | -0.675083 | 0.000432  |
| H | -2.788747 | -1.220096 | -0.000202 |
| H | -2.788779 | 1.220026  | 0.000198  |
| H | -0.644456 | 2.526942  | 0.000269  |
| H | -0.644313 | -2.526927 | -0.000268 |
| H | 2.825432  | 1.425070  | -0.000829 |
| H | 2.825279  | -1.425148 | 0.000823  |

$T_1$

$E_{el} = -308.398812$

|   | X         | Y         | Z         |
|---|-----------|-----------|-----------|
| C | -1.804065 | -0.713723 | -0.000012 |
| C | -1.804056 | 0.713713  | 0.000010  |
| C | -0.630749 | 1.463649  | 0.000016  |
| C | 0.559494  | 0.733823  | 0.000006  |
| C | 0.559461  | -0.733774 | -0.000003 |
| C | -0.630763 | -1.463648 | -0.000016 |
| C | 1.986382  | 0.740528  | -0.000021 |
| C | 1.986344  | -0.740568 | 0.000020  |
| H | -2.760517 | -1.224145 | -0.000017 |
| H | -2.760488 | 1.224165  | 0.000014  |
| H | -0.658618 | 2.547179  | 0.000016  |
| H | -0.658530 | -2.547176 | -0.000016 |
| H | 2.752947  | 1.501083  | -0.000050 |
| H | 2.752923  | -1.501103 | 0.000046  |

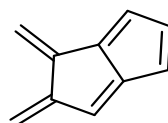

1,2-dimethylene-1,2-dihydropentalene

$S_0$

$E_{el} = -385.891560573$

|   | X           | Y           | Z           |
|---|-------------|-------------|-------------|
| C | -1.70425700 | 1.21839100  | 0.00000000  |
| C | -2.73876100 | 0.17783900  | -0.00000200 |
| C | -2.17529200 | -1.07067400 | 0.00000200  |
| C | -0.74555300 | -0.86495300 | 0.00000000  |
| C | -0.49730600 | 0.58833800  | 0.00000000  |
| C | 0.43903700  | -1.52757800 | 0.00000000  |
| C | 1.54809100  | -0.56817100 | 0.00000000  |

|   |             |             |             |
|---|-------------|-------------|-------------|
| C | 0.94378100  | 0.81350000  | 0.00000000  |
| H | -1.90421000 | 2.28094100  | 0.00000000  |
| H | -3.80151100 | 0.38529400  | -0.00000300 |
| H | -2.69391800 | -2.01757000 | 0.00000400  |
| H | 0.58989600  | -2.60057100 | 0.00000100  |
| C | 1.61621500  | 1.97292500  | 0.00000100  |
| H | 1.09679300  | 2.92371800  | 0.00000100  |
| H | 2.69913600  | 2.00658700  | 0.00000100  |
| C | 2.85000700  | -0.89175700 | -0.00000100 |
| H | 3.62832300  | -0.13822900 | -0.00000100 |
| H | 3.16972400  | -1.92733700 | -0.00000100 |

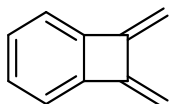

7,8-dimethylenebicyclo[4.2.0]octa-1,3,5-triene

$S_0$

$E_{el} = -385.898896432$

|   | X           | Y           | Z           |
|---|-------------|-------------|-------------|
| C | -2.46312300 | 0.70153400  | 0.00002300  |
| C | -1.27372600 | 1.44267600  | -0.00049800 |
| C | -0.10031000 | -0.70454200 | -0.00008200 |
| C | -1.27367800 | -1.44269500 | 0.00040700  |
| C | -2.46310600 | -0.70159700 | 0.00026900  |
| H | -3.41398000 | 1.22295700  | 0.00001200  |
| H | -1.29231400 | 2.52636900  | -0.00088300 |
| H | -1.29220800 | -2.52638600 | 0.00085300  |
| H | -3.41394900 | -1.22304700 | 0.00064400  |
| C | -0.10030600 | 0.70460100  | -0.00045100 |
| C | 1.38693100  | 0.75784900  | -0.00027700 |
| C | 1.38686600  | -0.75789400 | -0.00005000 |
| C | 2.32632000  | -1.70227000 | -0.00035200 |
| H | 2.07045300  | -2.75545800 | -0.00022500 |
| H | 3.37969200  | -1.44671000 | -0.00064800 |
| C | 2.32620300  | 1.70234000  | 0.00067000  |
| H | 3.37959700  | 1.44677800  | 0.00129500  |
| H | 2.07028700  | 2.75549100  | 0.00100000  |

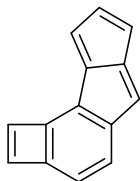

cyclobuta[g]cyclopenta[a]indene

$S_0$

$E_{el} = -538.288419454$

|   | X          | Y           | Z           |
|---|------------|-------------|-------------|
| C | 2.58466400 | -0.00037000 | -0.00000800 |

|   |             |             |             |
|---|-------------|-------------|-------------|
| C | 2.61952500  | 1.35246100  | 0.00000000  |
| C | 1.33565300  | 2.02233400  | -0.00000200 |
| C | 0.16931900  | 1.30541600  | -0.00000500 |
| C | 0.14277100  | -0.17620000 | -0.00000800 |
| C | 1.35358600  | -0.77330400 | -0.00001000 |
| C | -1.21254000 | 1.77083900  | 0.00000200  |
| C | -2.04761400 | 0.69226500  | 0.00000700  |
| C | -1.26140800 | -0.55159400 | -0.00000100 |
| C | -3.44936800 | 0.32482700  | 0.00001000  |
| C | -3.49228600 | -1.04233800 | -0.00000100 |
| C | -2.13093200 | -1.59987800 | -0.00000900 |
| C | 2.19087200  | -2.01760500 | 0.00001000  |
| C | 3.34349300  | -1.29321000 | 0.00000800  |
| H | 3.53649700  | 1.92946600  | 0.00000600  |
| H | 1.30698000  | 3.10678800  | 0.00000100  |
| H | -1.49655700 | 2.81642600  | 0.00000200  |
| H | -4.29362300 | 0.99843000  | 0.00001900  |
| H | -4.39182400 | -1.64416500 | -0.00000200 |
| H | -1.90170500 | -2.65675800 | -0.00001900 |
| H | 1.97346200  | -3.07669900 | 0.00002000  |
| H | 4.39235200  | -1.55534100 | 0.00001500  |

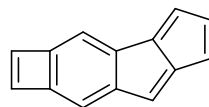

cyclobuta[f]cyclopenta[a]indene

$S_0$

$E_{el} = -538.276029086$

|   | X           | Y           | Z           |
|---|-------------|-------------|-------------|
| C | 2.16610600  | -0.86817200 | -0.00000400 |
| C | 2.47045000  | 0.59761300  | -0.00000400 |
| C | 1.52814600  | 1.56158400  | -0.00000500 |
| C | 0.16620700  | 1.09019700  | -0.00001500 |
| C | -0.14022300 | -0.41193800 | -0.00002200 |
| C | 0.91841800  | -1.38547900 | -0.00001100 |
| C | -1.01547500 | 1.77237900  | -0.00000900 |
| C | -2.09598500 | 0.79314900  | -0.00001300 |
| C | -1.50212600 | -0.53706900 | -0.00003000 |
| C | -3.45187000 | 0.65582200  | 0.00003000  |
| C | -3.75488900 | -0.79205300 | 0.00002400  |
| C | -2.59343500 | -1.50643400 | -0.00000500 |
| C | 3.60511800  | -1.11825700 | 0.00001700  |
| C | 3.88473100  | 0.23678200  | 0.00002300  |
| H | 1.74679200  | 2.62408800  | 0.00000300  |
| H | 0.70094500  | -2.44767400 | -0.00001100 |
| H | -1.12541400 | 2.84833700  | -0.00000500 |
| H | -4.19902000 | 1.43861500  | 0.00006300  |
| H | -4.75477200 | -1.20445300 | 0.00004400  |
| H | -2.50298200 | -2.58318400 | -0.00001800 |



|   |            |             |            |
|---|------------|-------------|------------|
| H | 4.21739900 | -2.00891700 | 0.00002800 |
| H | 4.80602100 | 0.80444400  | 0.00003800 |

## S5 HRMS spectra

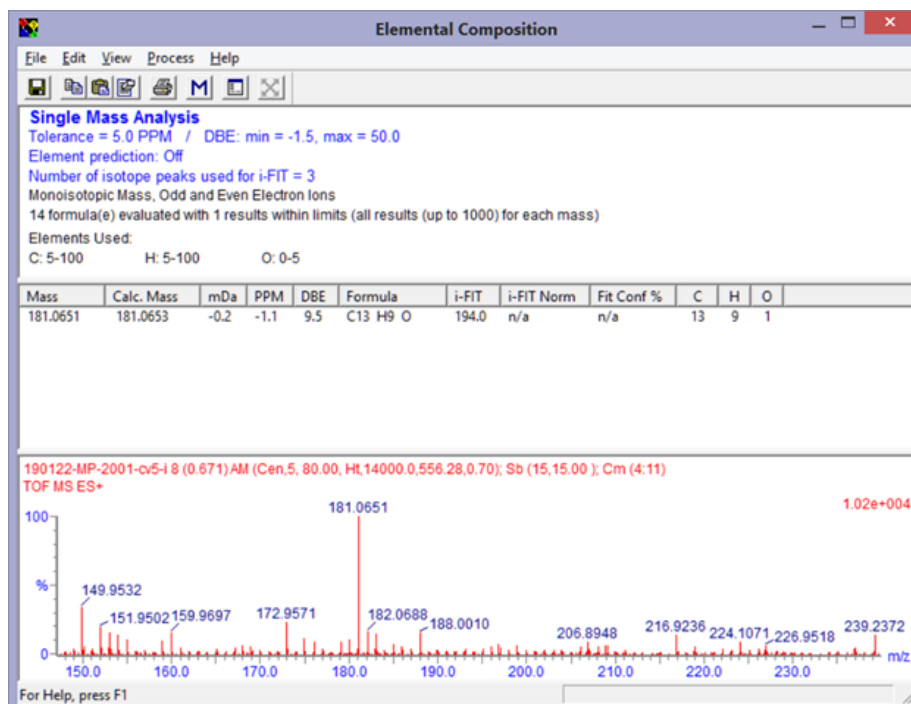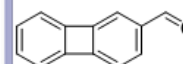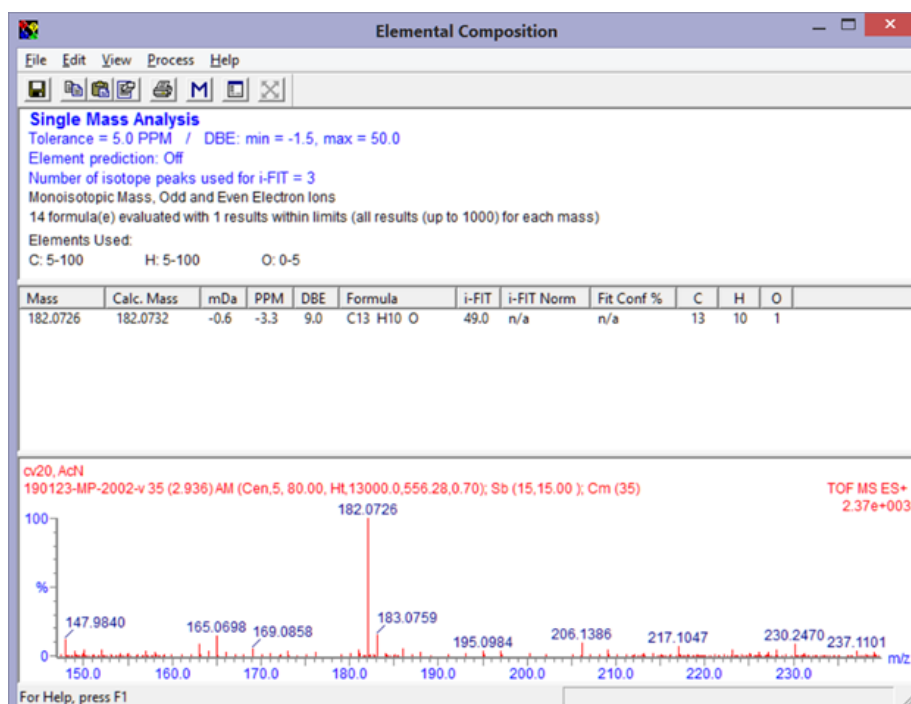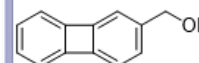

Figure S16: HRMS spectra of compound **3** (top) and **4** (bottom)

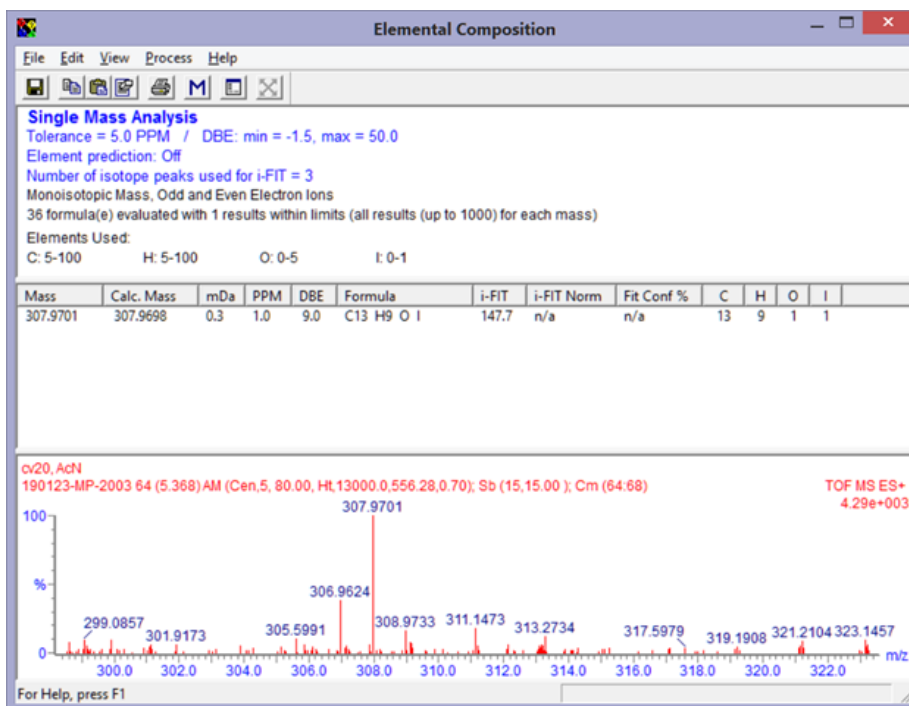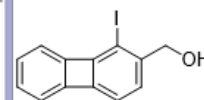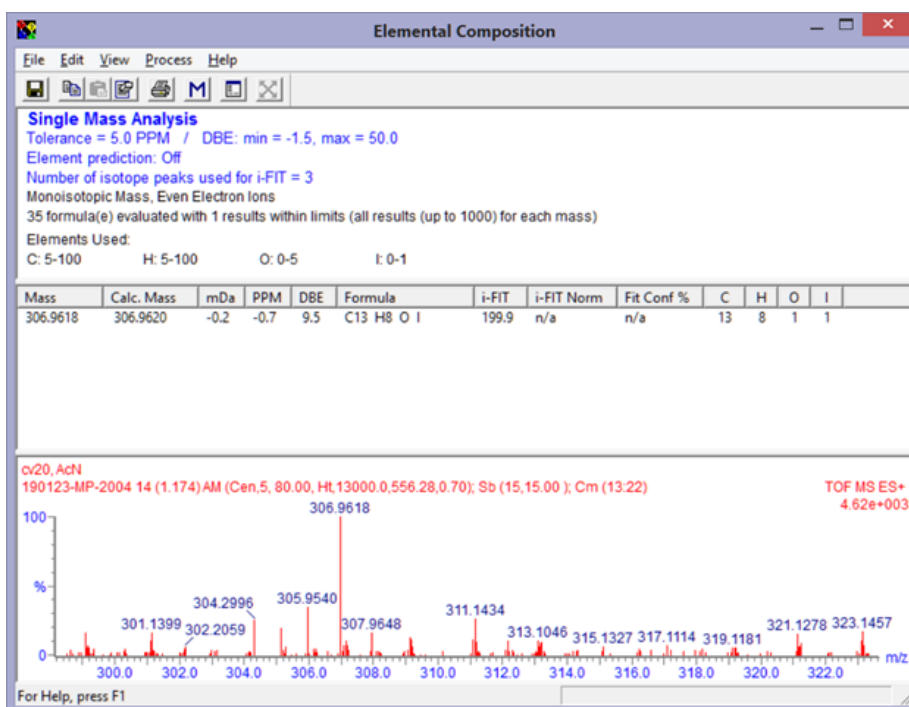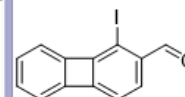

Figure S17: HRMS spectra of compound **5** (top) and **6** (bottom)

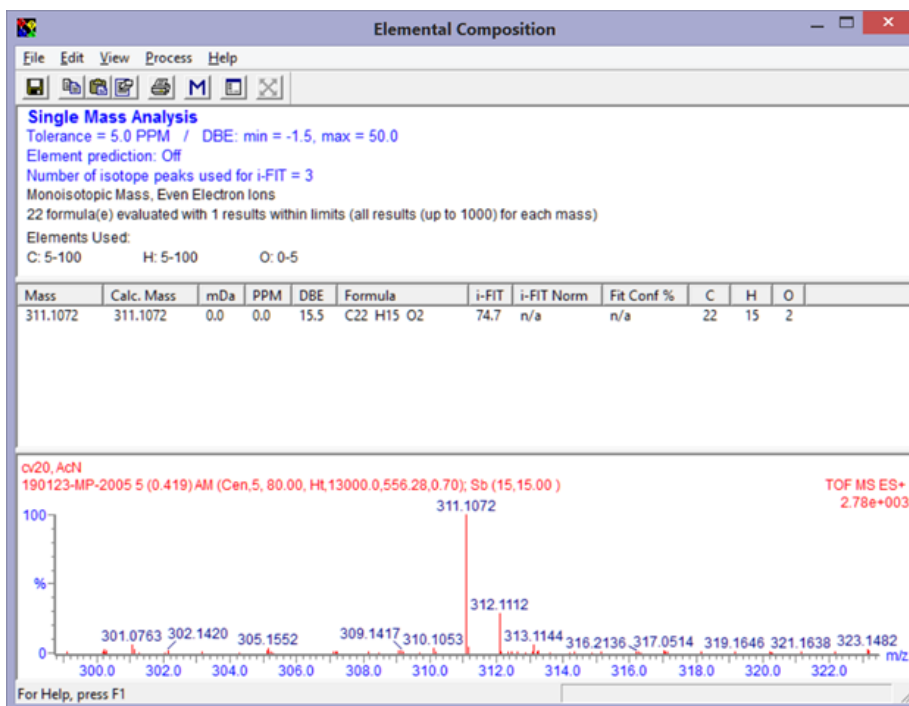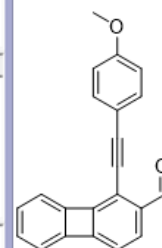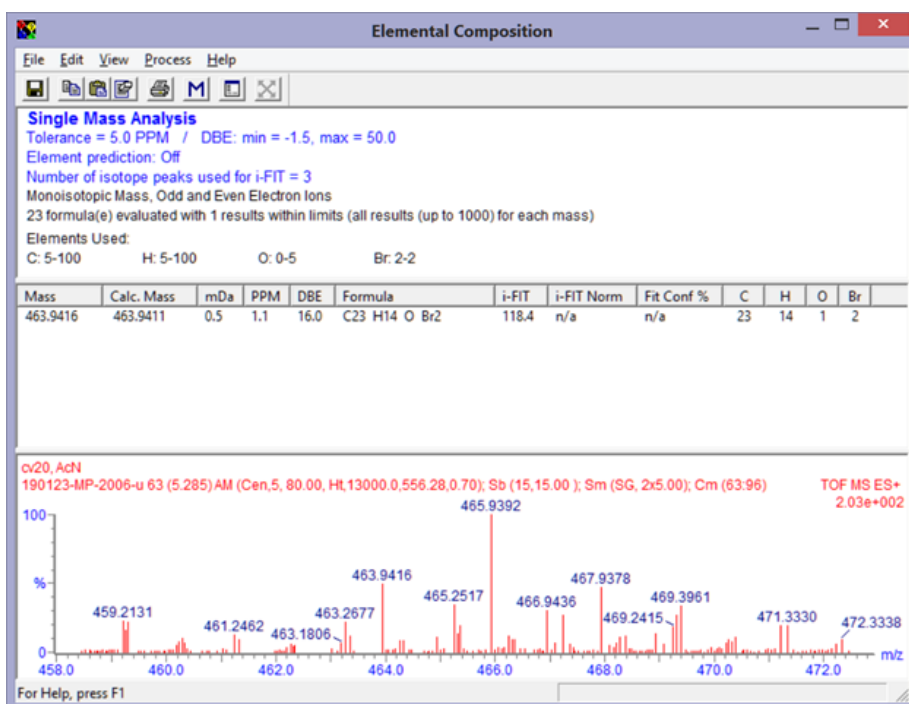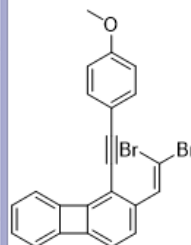

**Figure S18:** HRMS spectra of compound **7** (top) and **8** (bottom)

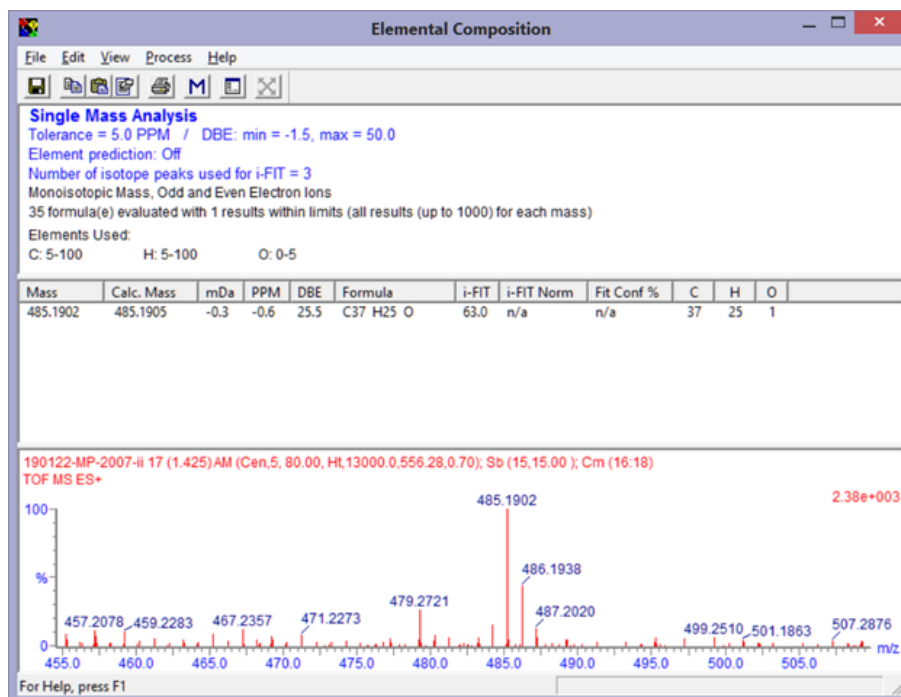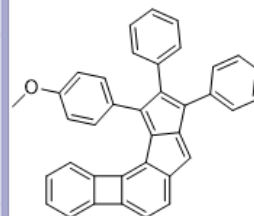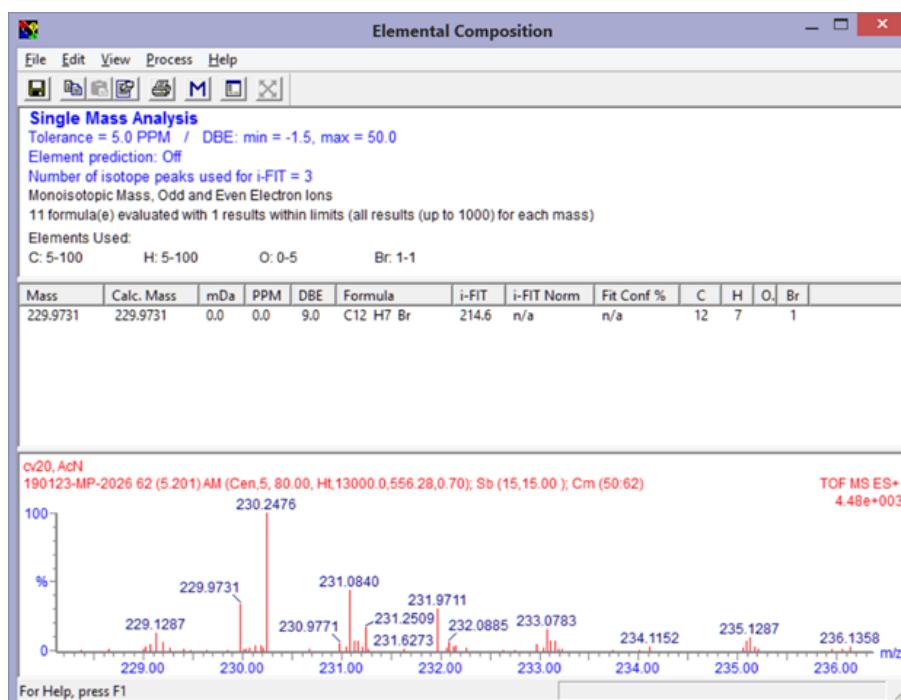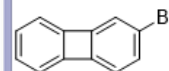

**Figure S19:** HRMS spectra of compound **9** (top) and **10** (bottom)

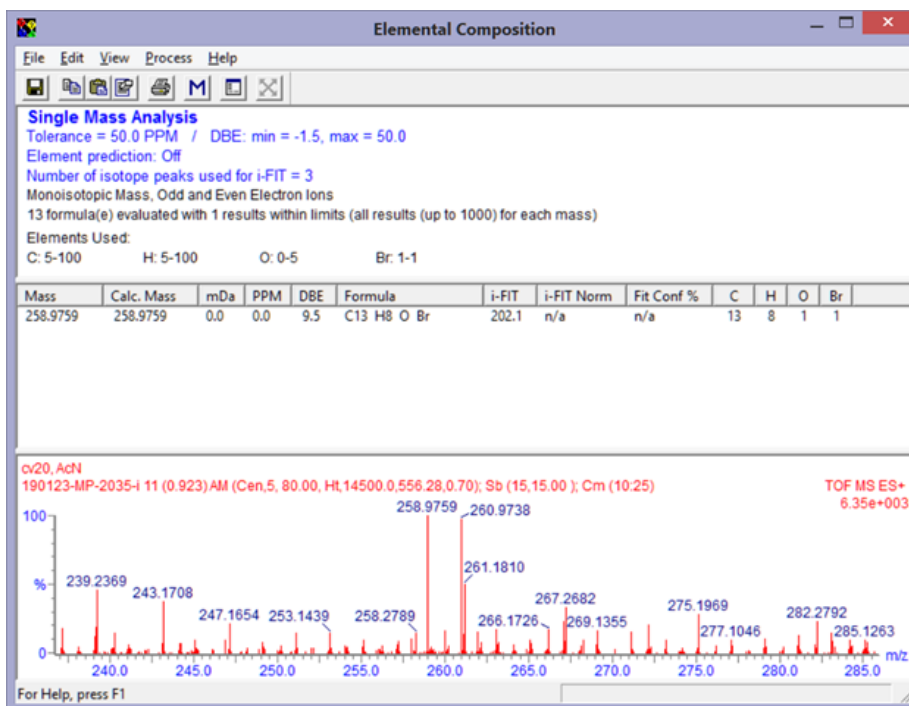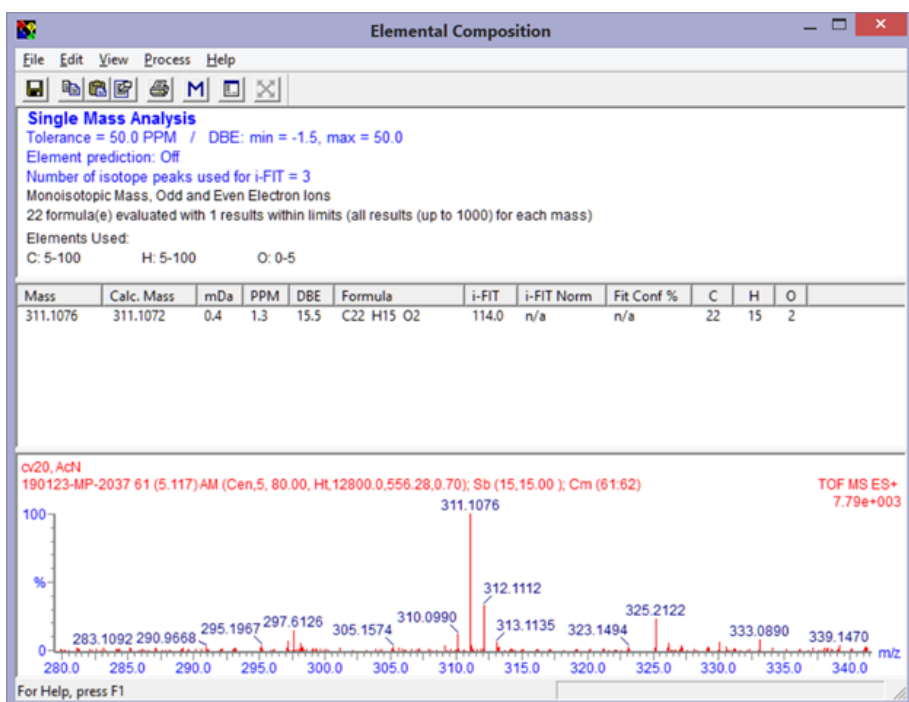

**Figure S20:** HRMS spectra of compound **11** (top) and **12** (bottom)

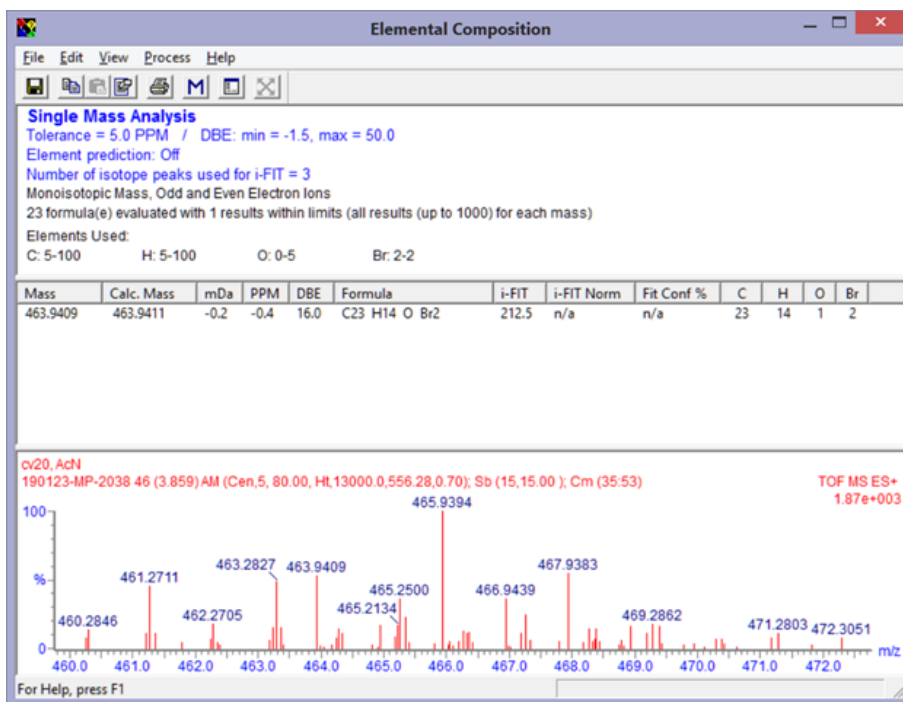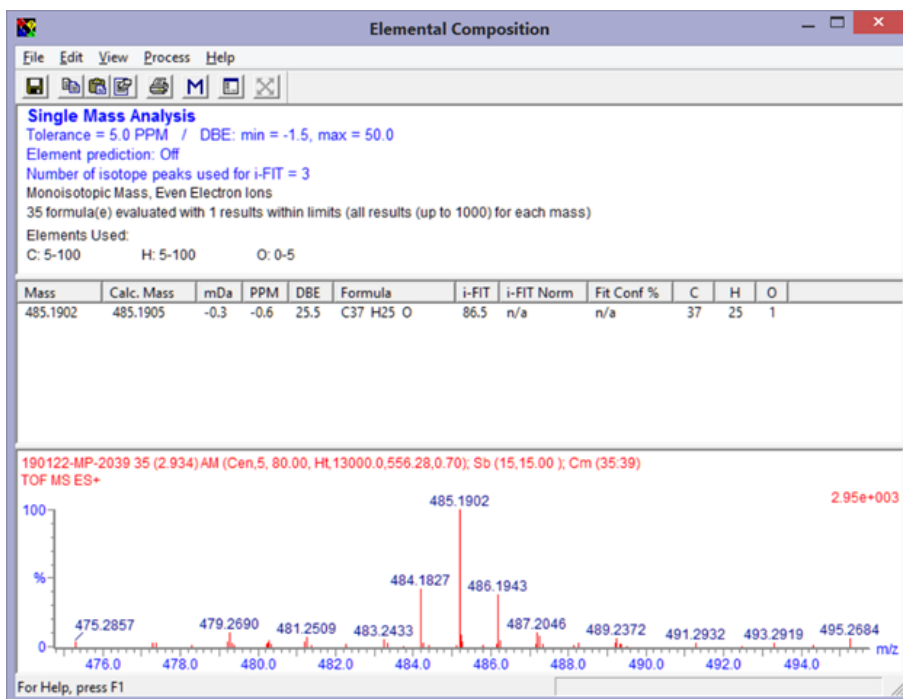

**Figure S21:** HRMS spectra of compound 13 (top) and 14 (bottom)

## S6 NMR spectra

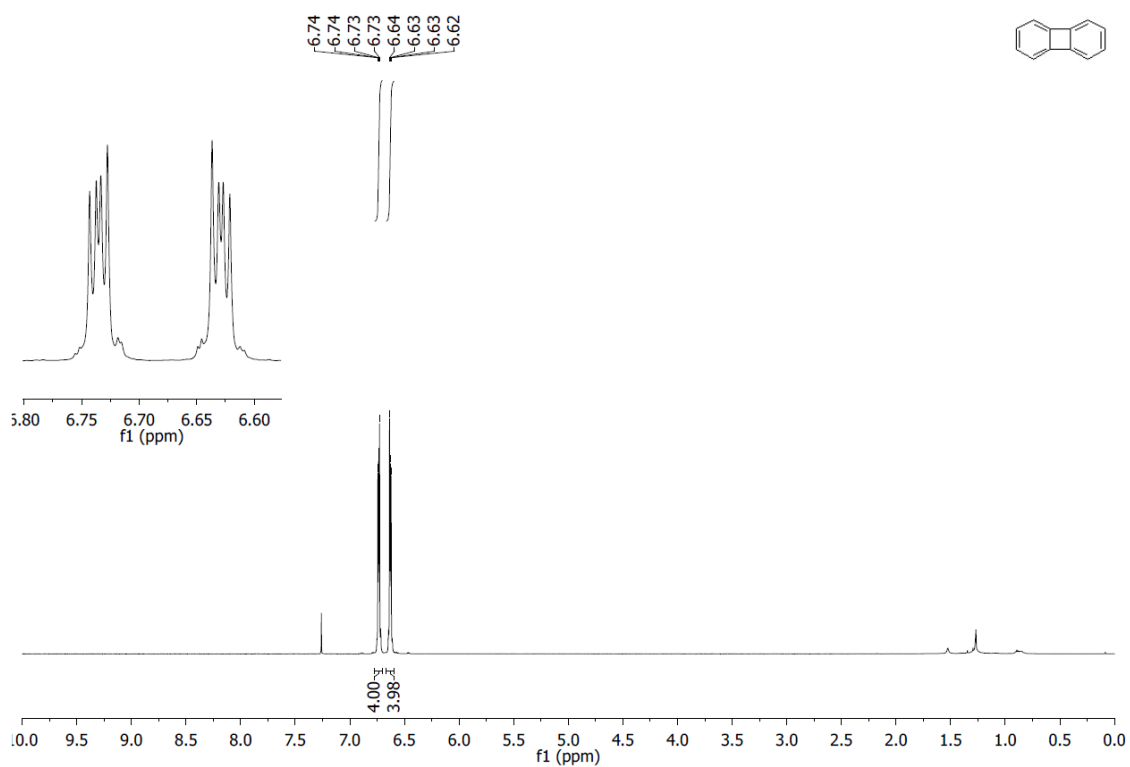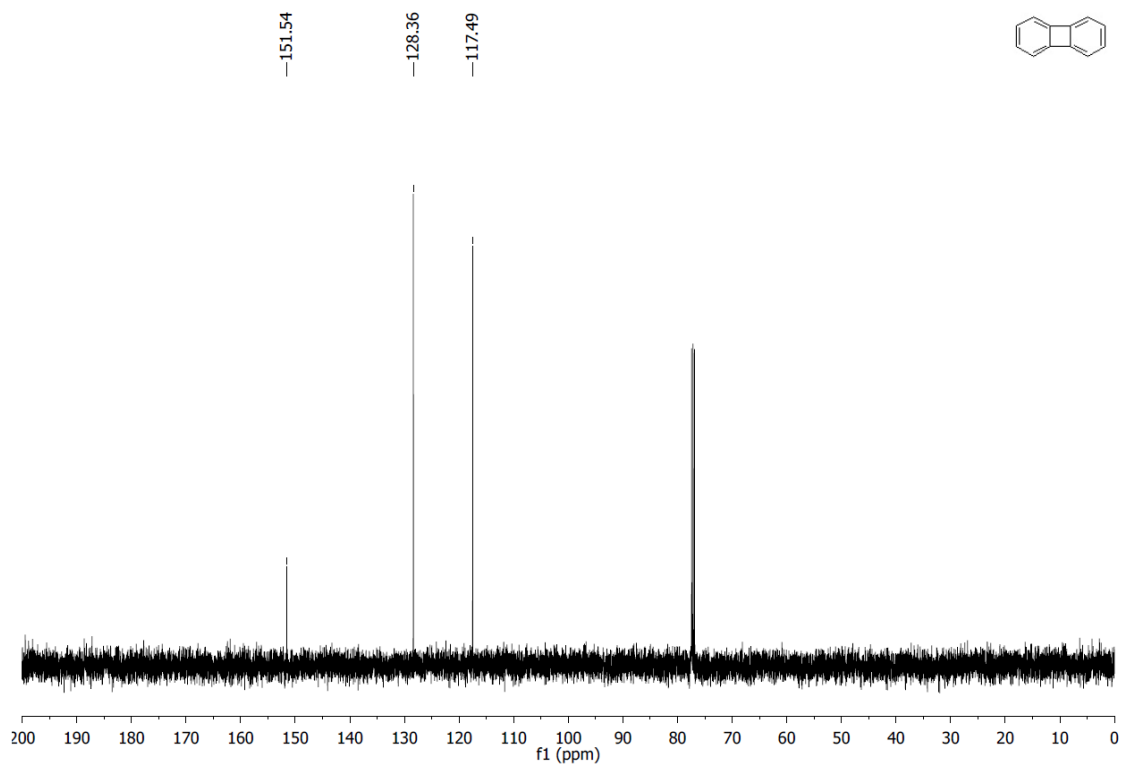

**Figure S22:** <sup>1</sup>H-NMR (500 MHz, top) and <sup>13</sup>C{<sup>1</sup>H}-NMR (126 MHz, bottom) spectra of **2** in CDCl<sub>3</sub>.



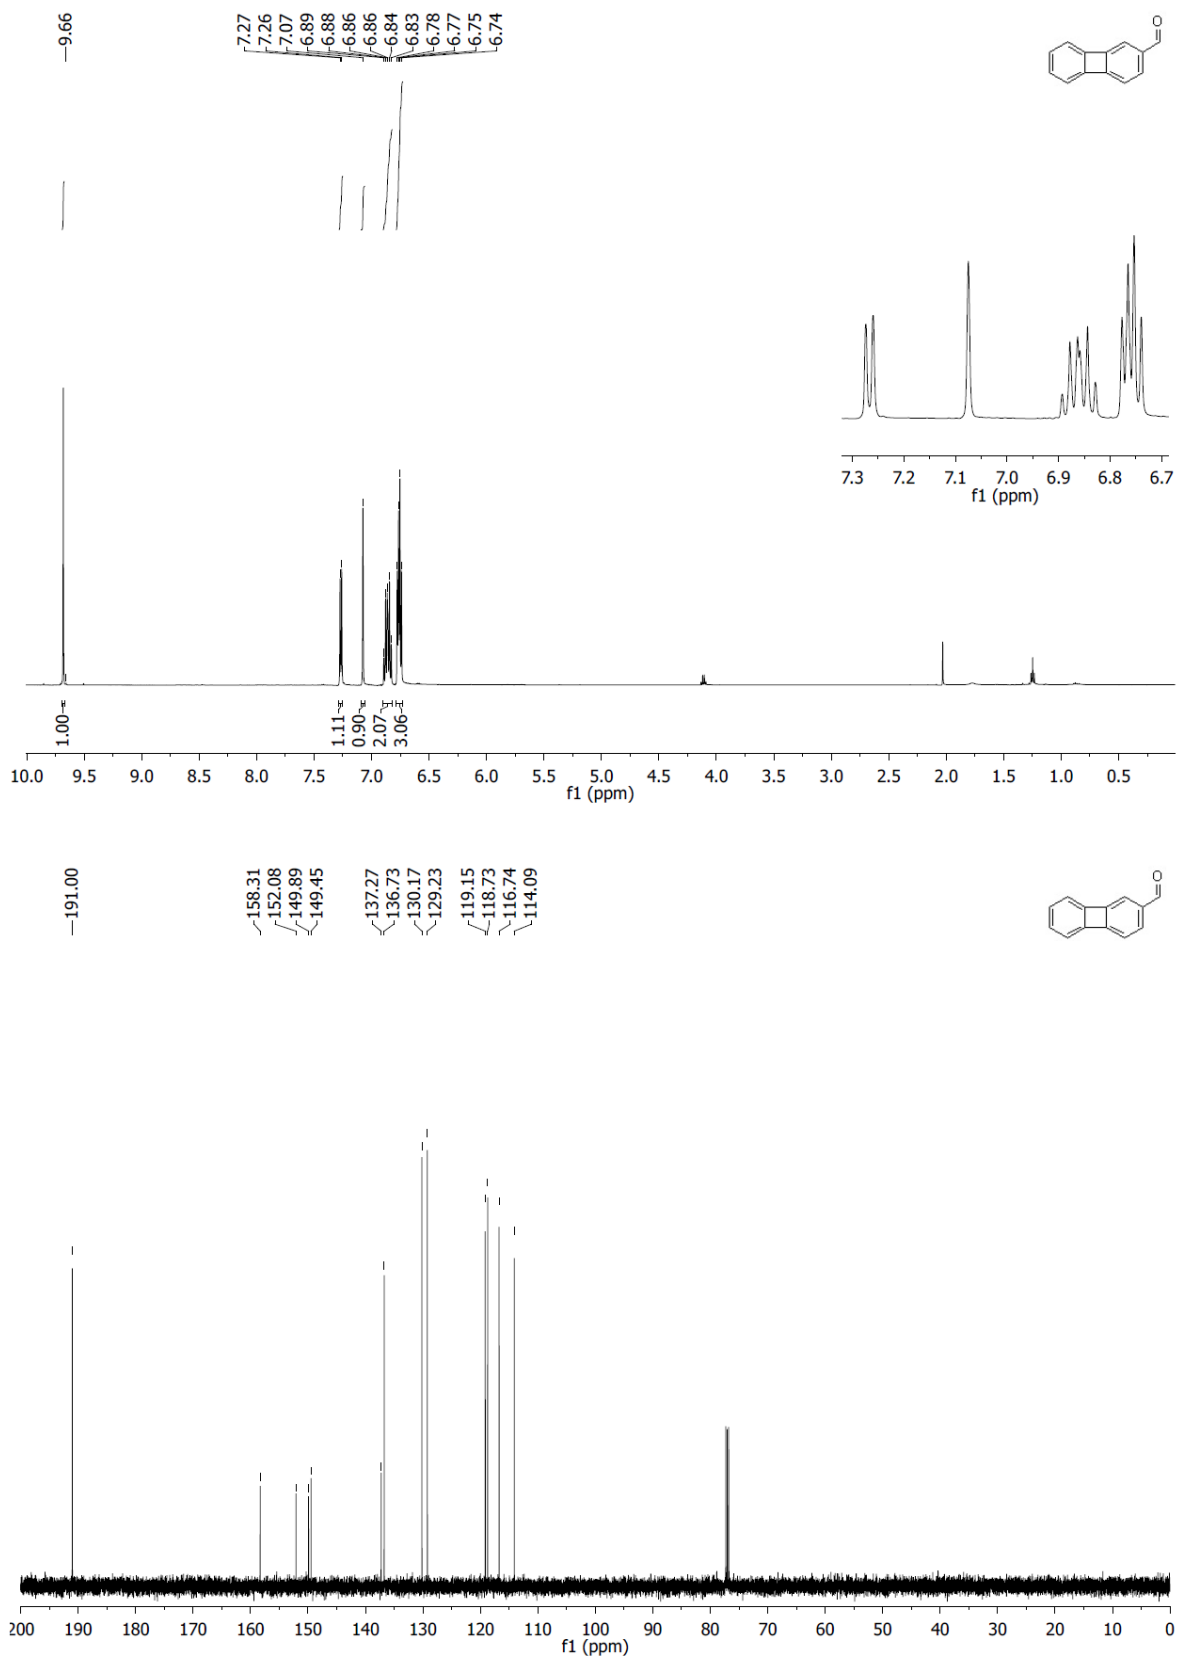

**Figure S23:** <sup>1</sup>H-NMR (500 MHz, top) and <sup>13</sup>C{<sup>1</sup>H}-NMR (126 MHz, bottom) spectra of **3** in CDCl<sub>3</sub>.

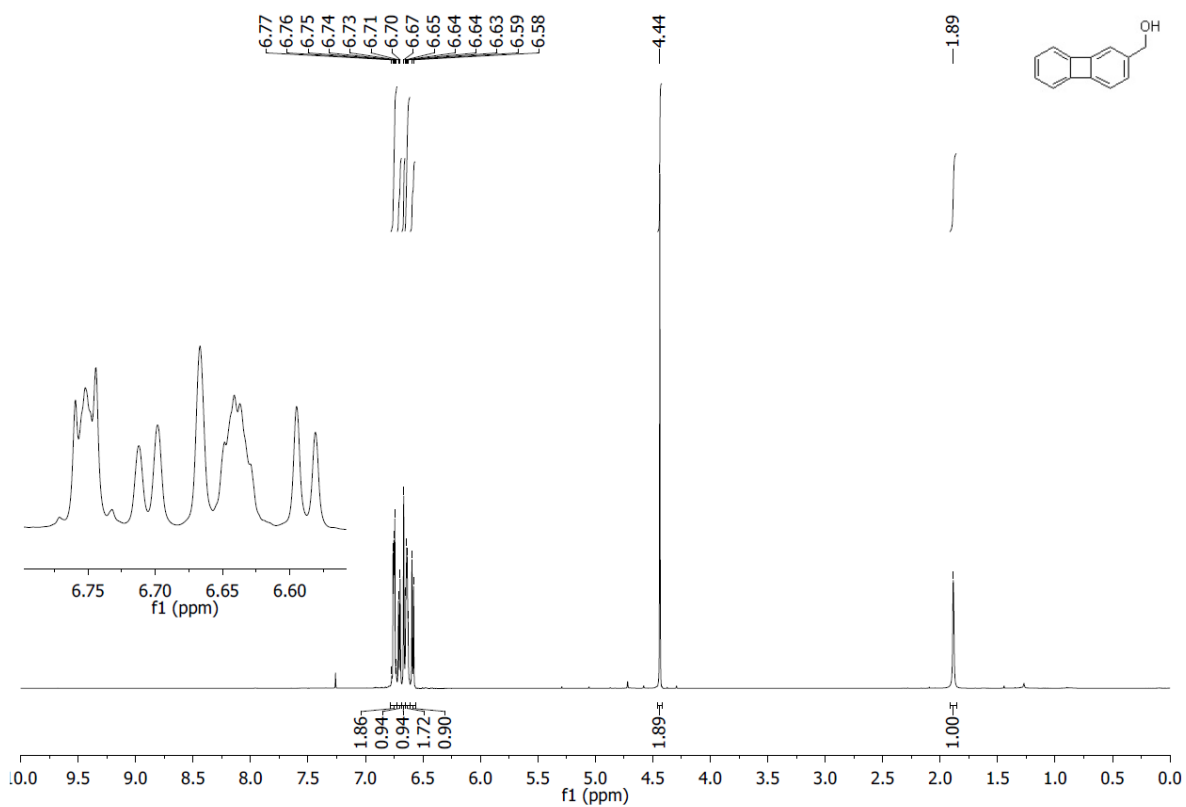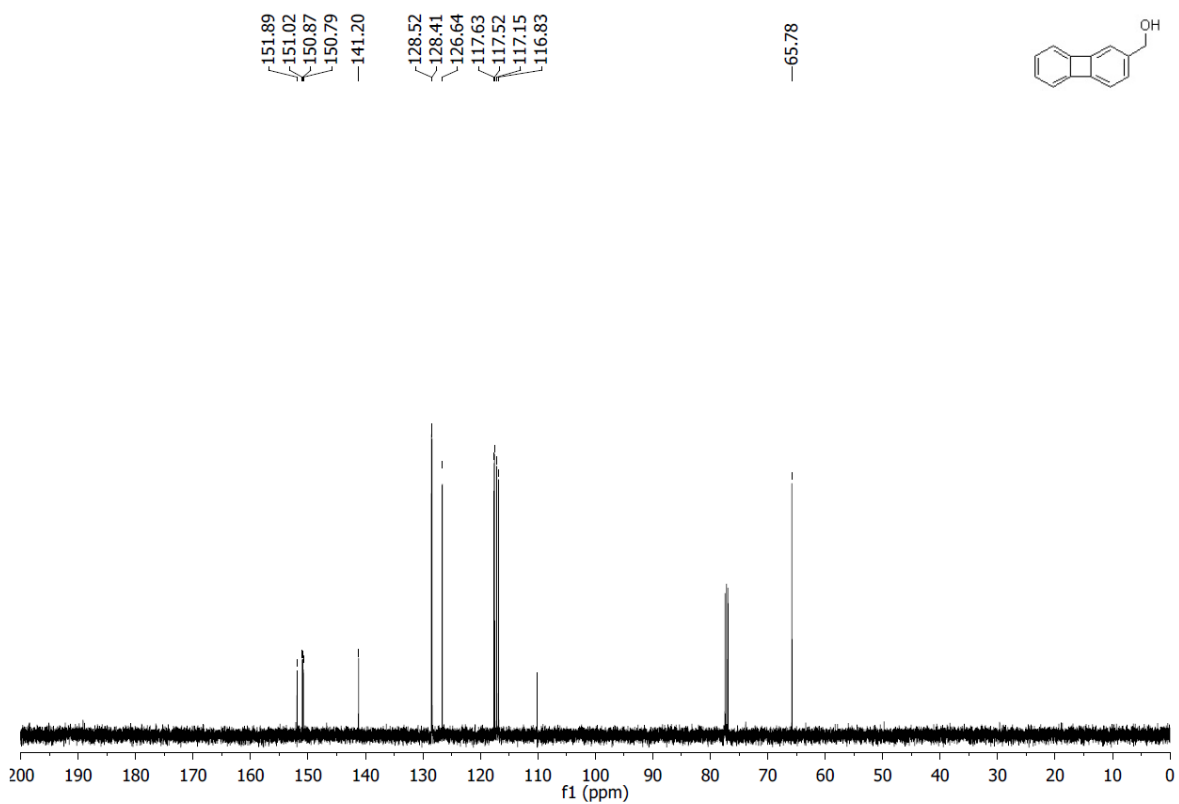

**Figure S24:**  $^1\text{H-NMR}$  (500 MHz, top) and  $^{13}\text{C}\{^1\text{H}\}\text{-NMR}$  (126 MHz, bottom) spectra of **4** in  $\text{CDCl}_3$ .

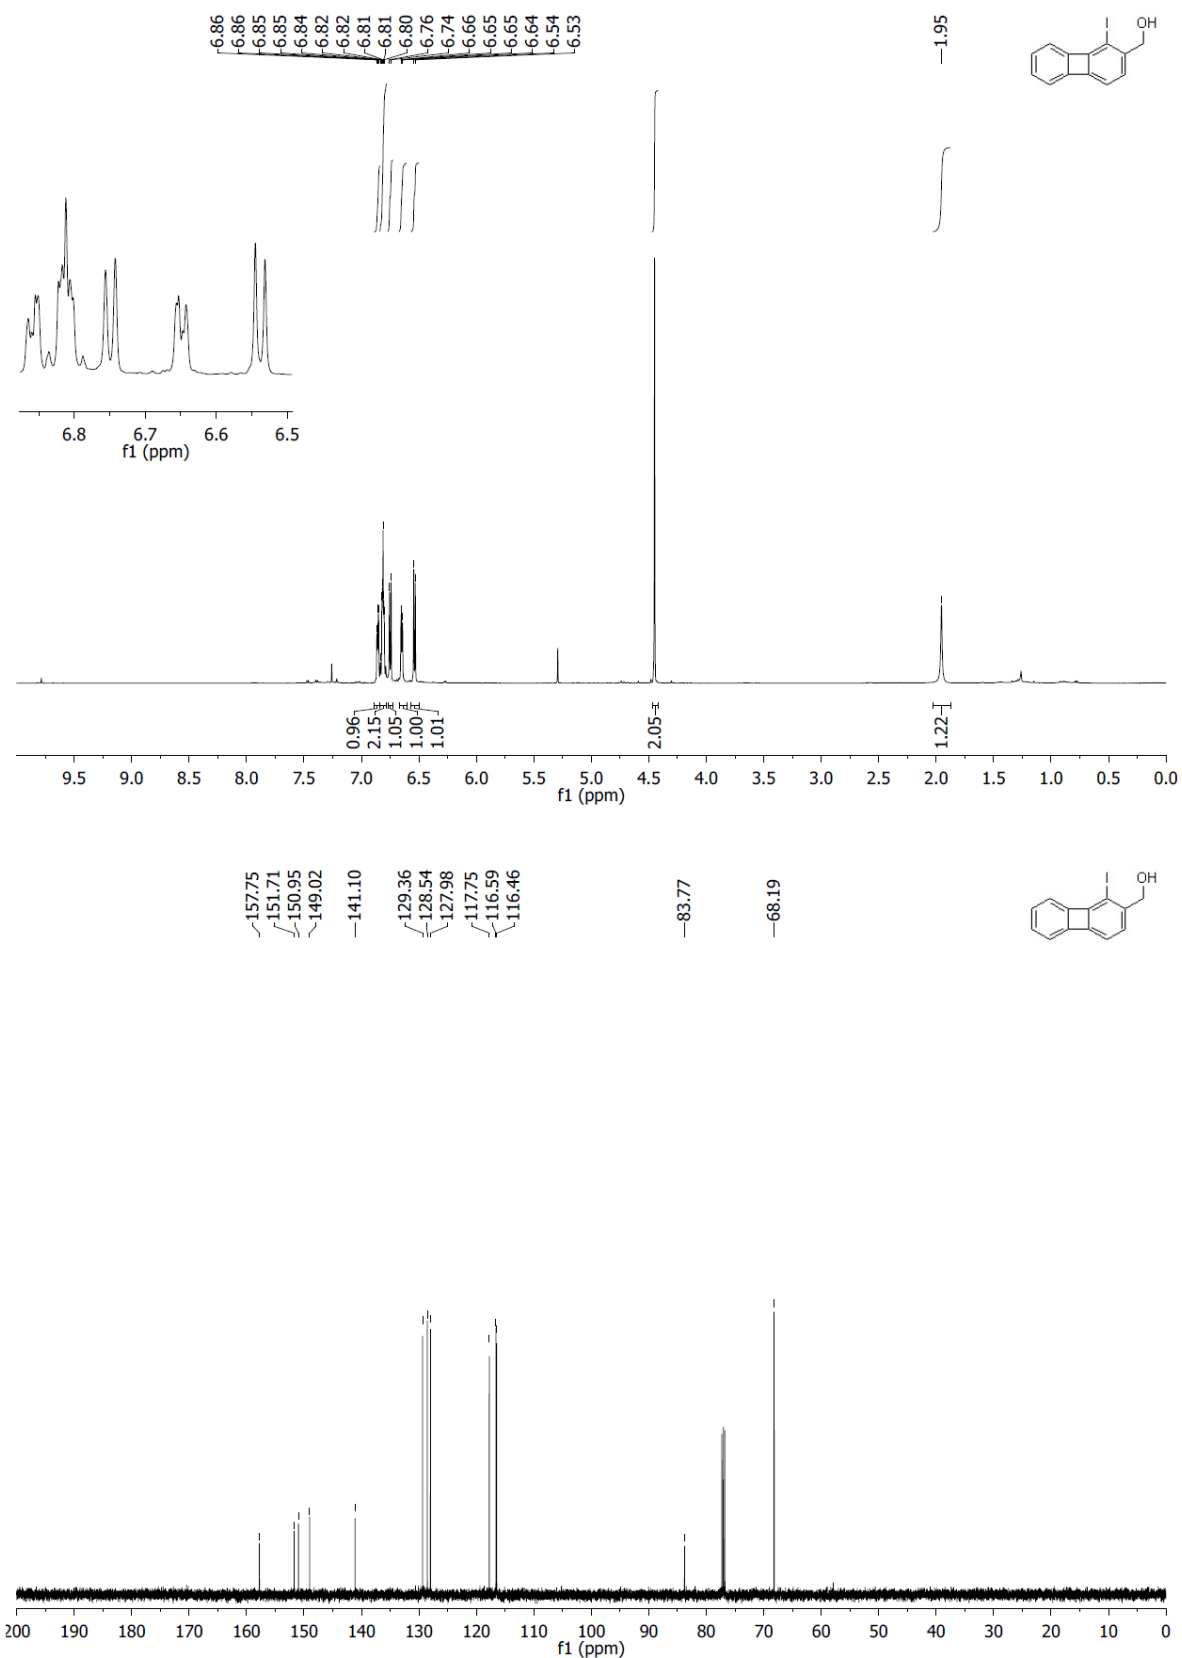

**Figure S25:** <sup>1</sup>H-NMR (500 MHz, top) and <sup>13</sup>C{<sup>1</sup>H}-NMR (126 MHz, bottom) spectra of **5** in CDCl<sub>3</sub>.

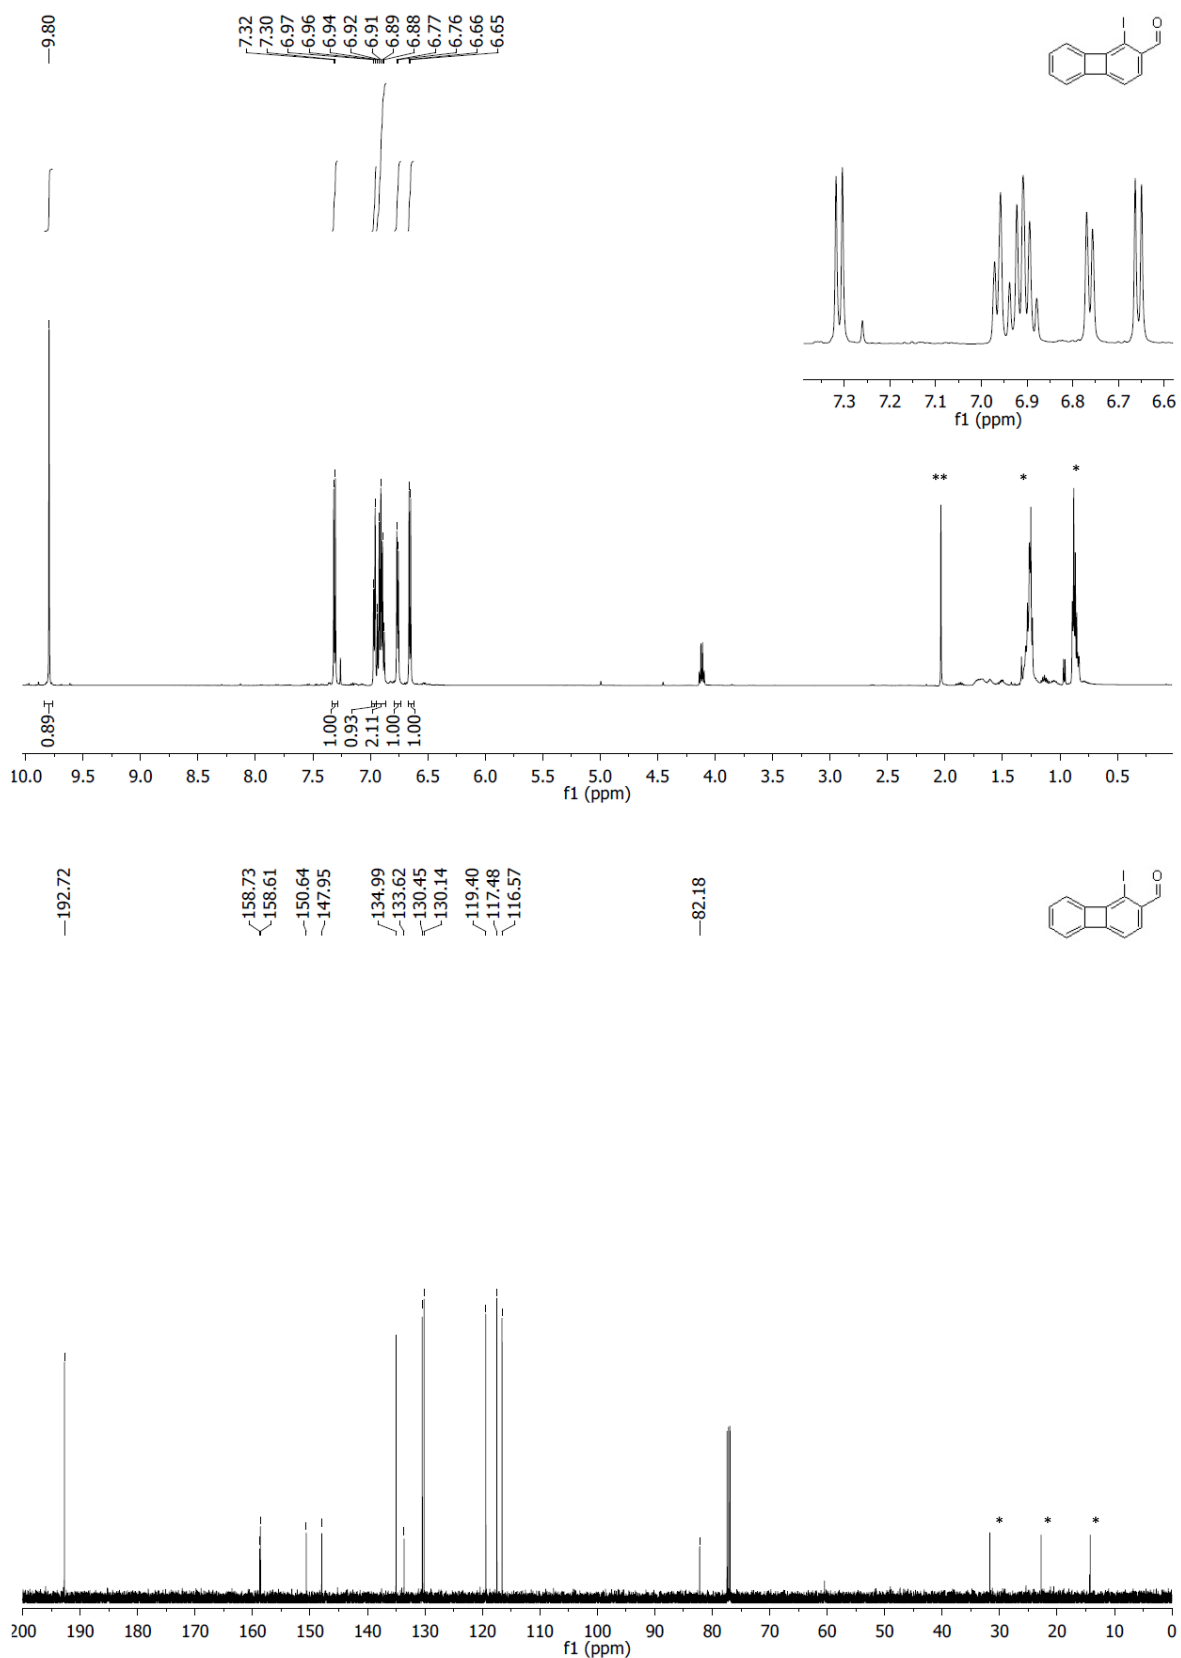

**Figure S26:** <sup>1</sup>H-NMR (500 MHz, top) and <sup>13</sup>C{<sup>1</sup>H}-NMR (126 MHz, bottom) of **6** in CDCl<sub>3</sub>. Impurities: \* *n*-hexane \*\* acetone.

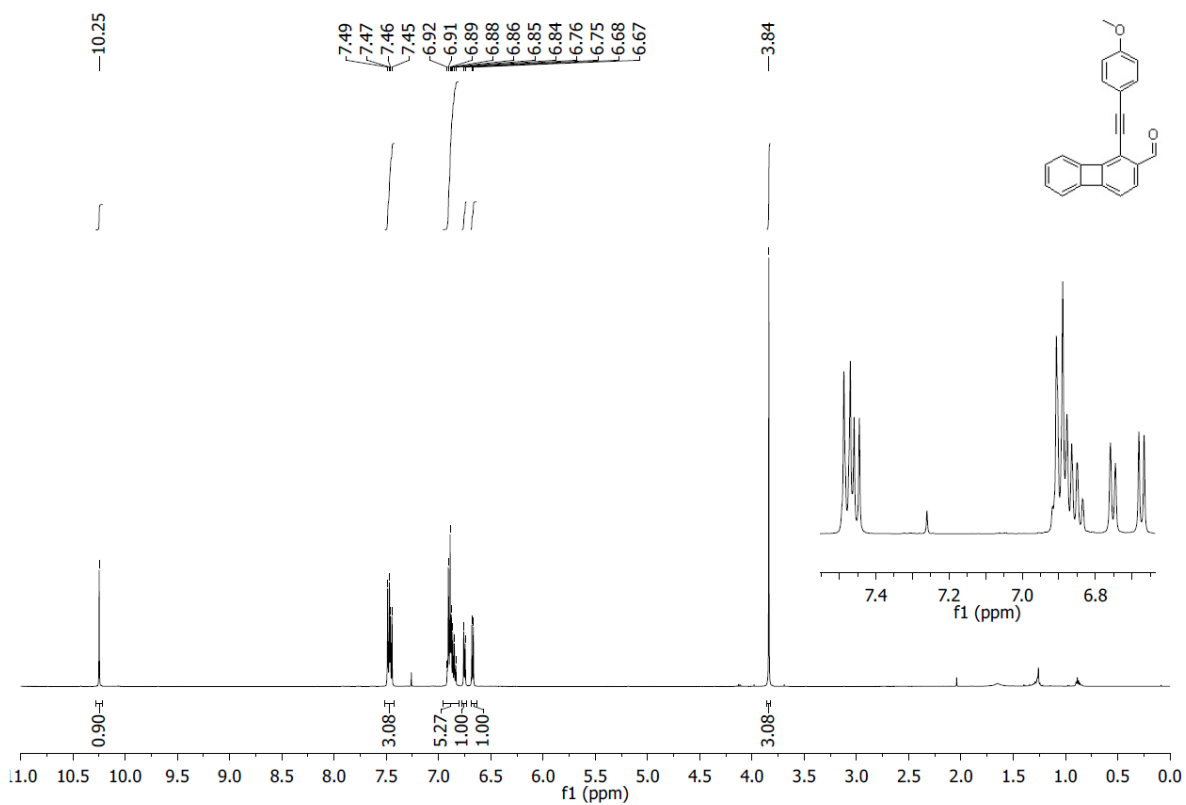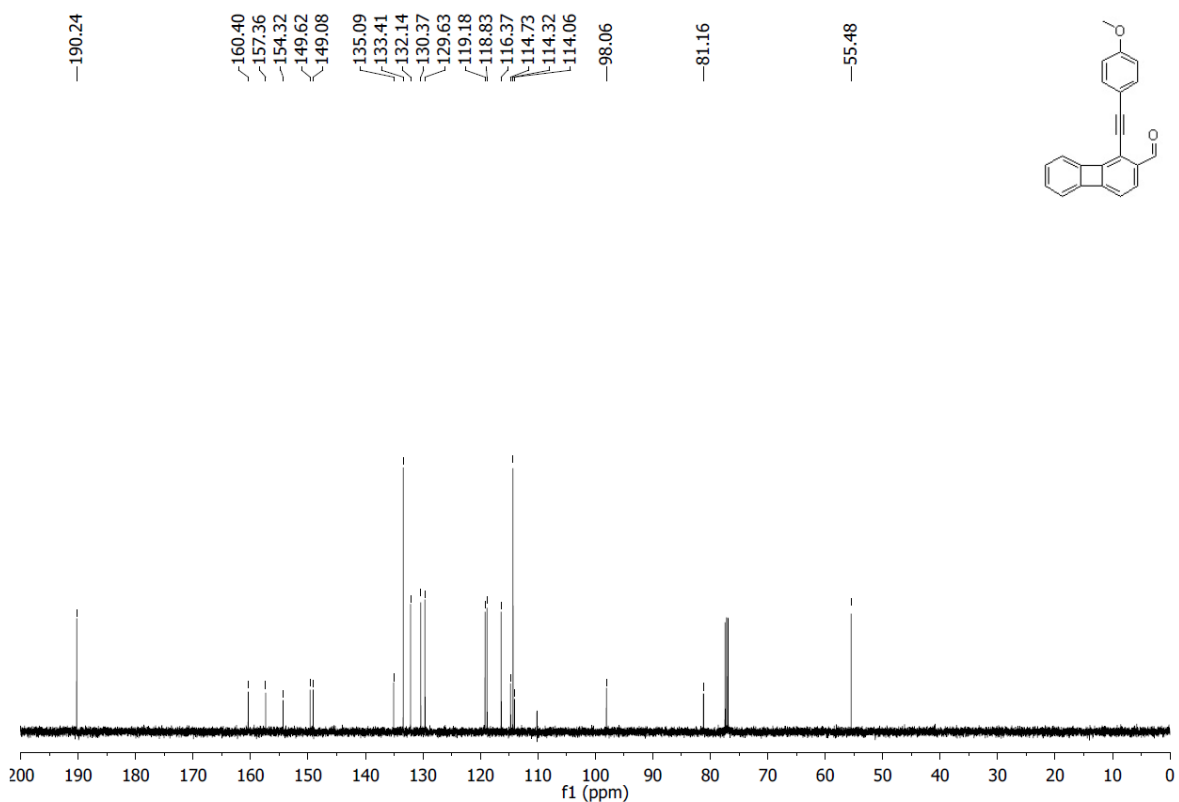

**Figure S27:**  $^1\text{H-NMR}$  (500 MHz, top) and  $^{13}\text{C}\{^1\text{H}\}$ -NMR (126 MHz, bottom) spectra of **7** in  $\text{CDCl}_3$ .

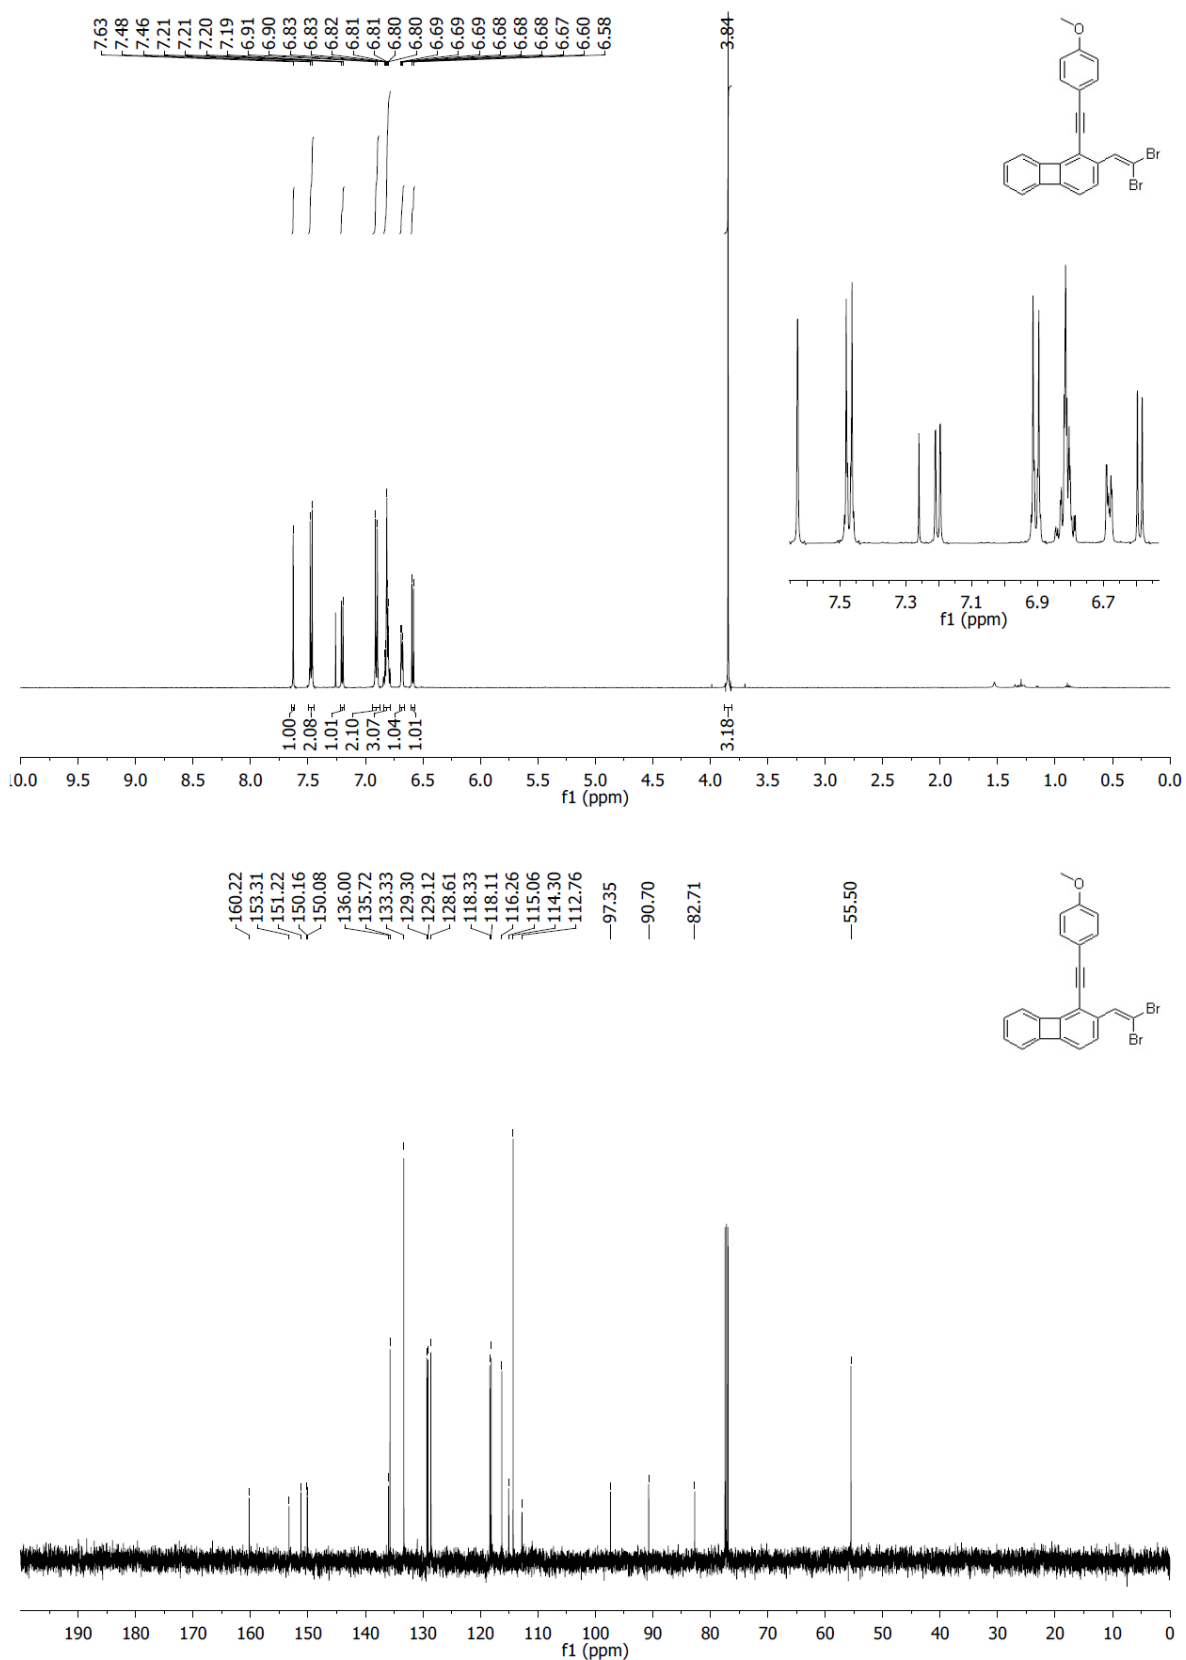

**Figure S28:** <sup>1</sup>H-NMR (500 MHz, top) and <sup>13</sup>C{<sup>1</sup>H}-NMR (126 MHz, bottom) spectra of **8** in CDCl<sub>3</sub>.

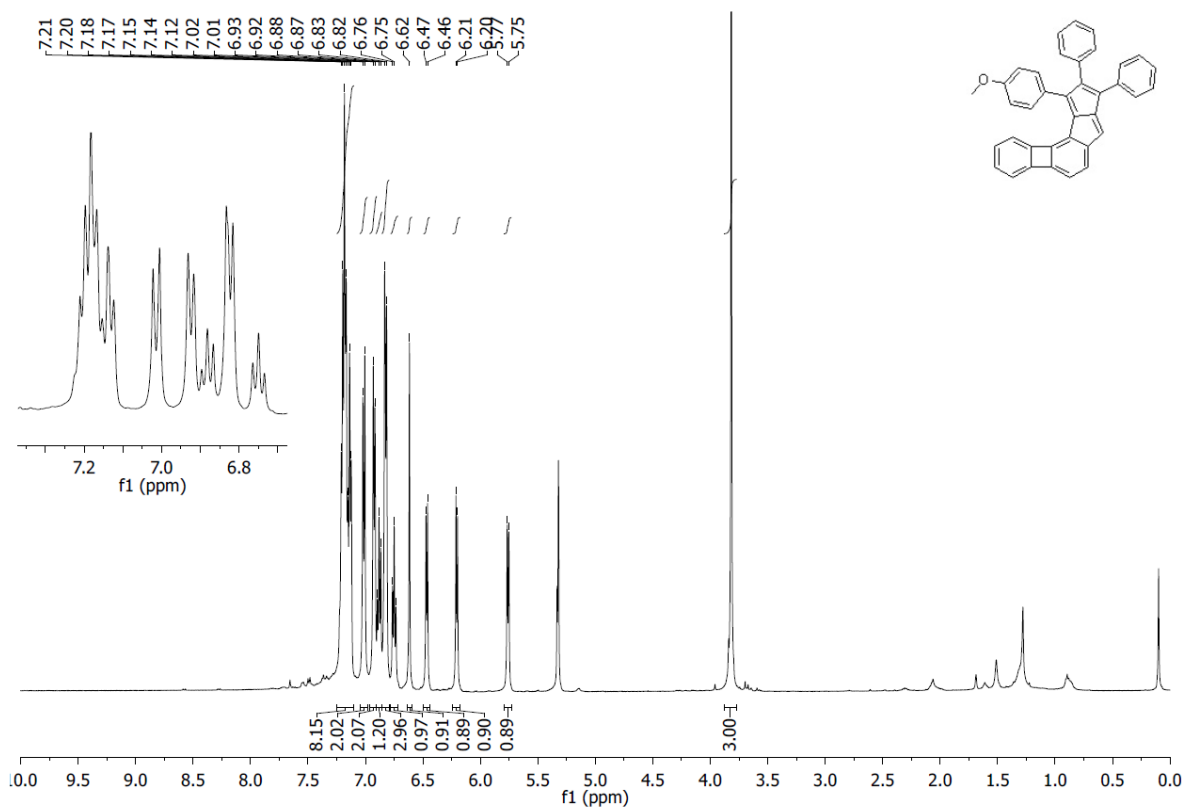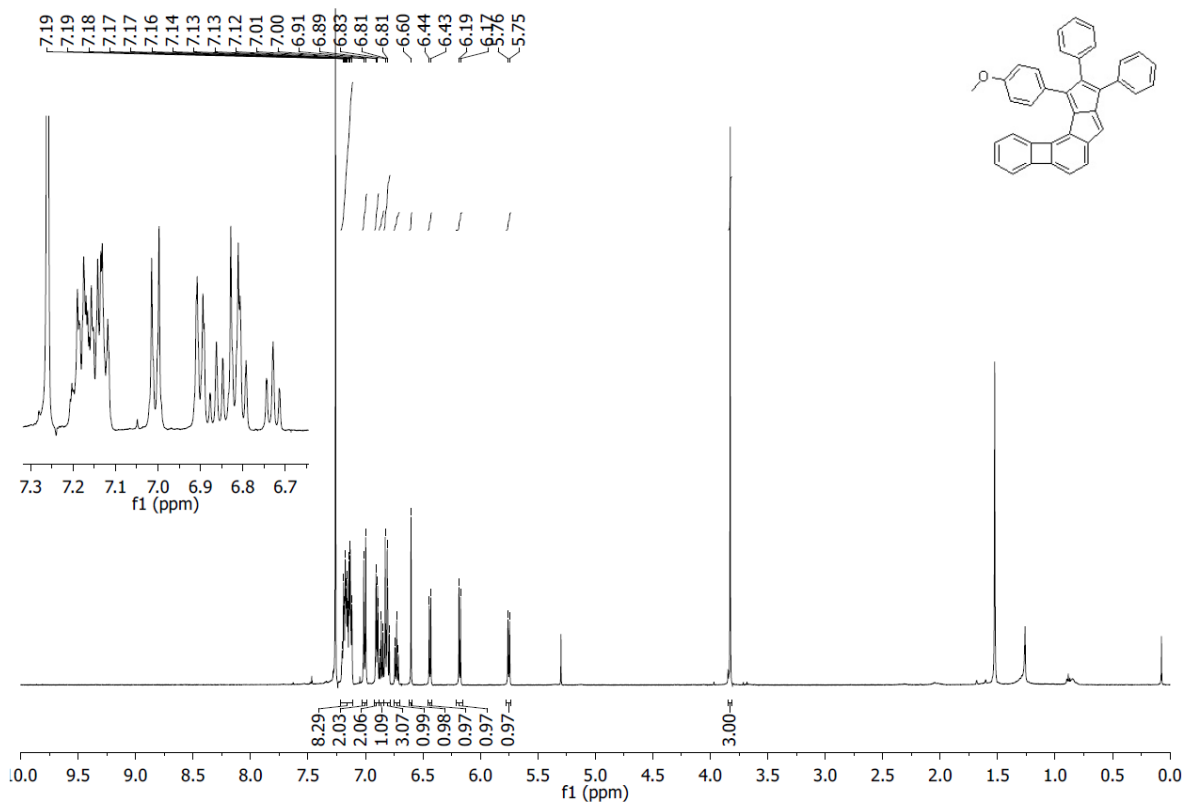

**Figure S29:** <sup>1</sup>H-NMR (500 MHz) in CD<sub>2</sub>Cl<sub>2</sub> (top) and <sup>1</sup>H-NMR (500 MHz) in CDCl<sub>3</sub> (bottom) spectra of **9**.

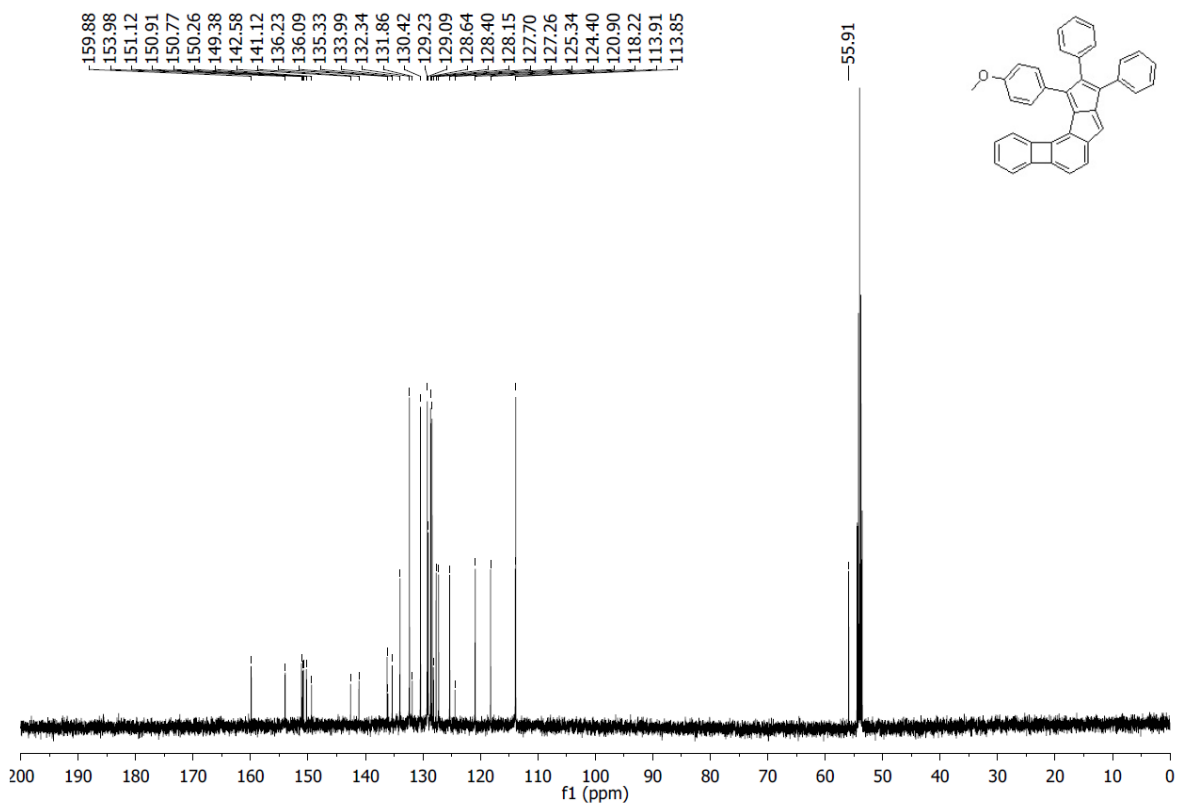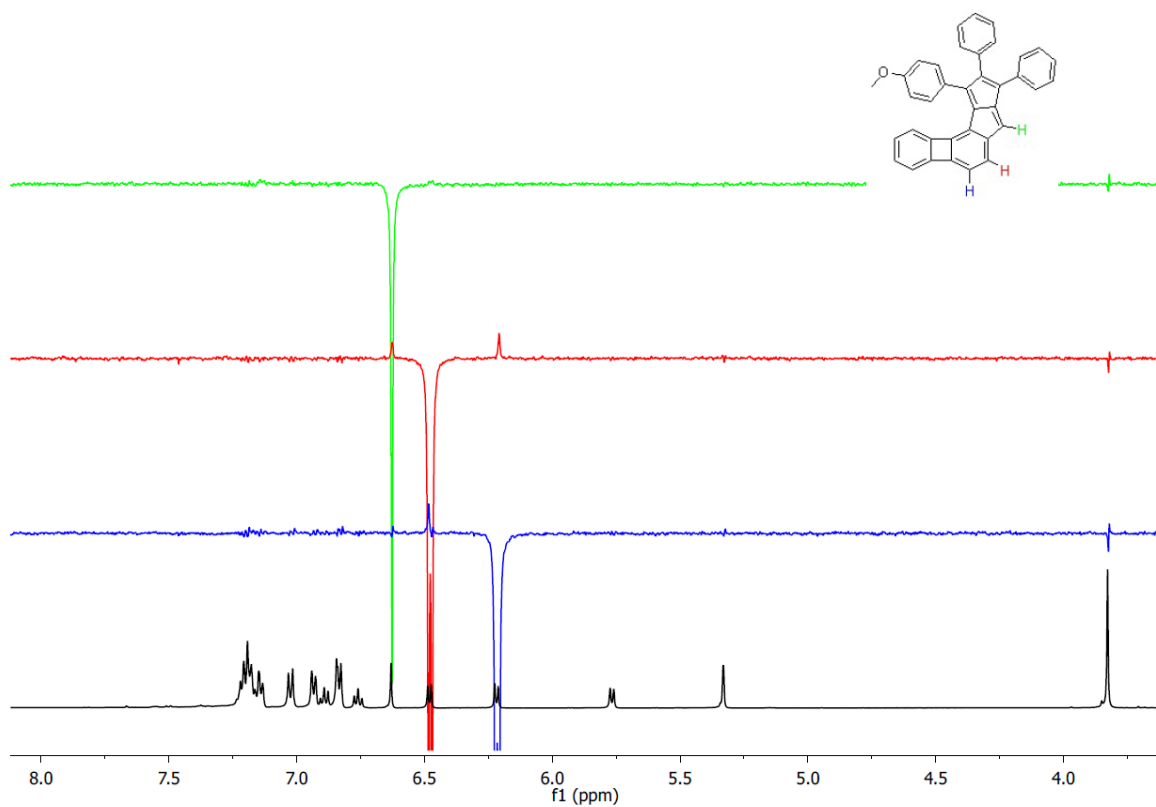

**Figure S30:**  $^{13}\text{C}$ -NMR (126 MHz, top) and 1D-NOESY (at 6.64 ppm, 6.48 ppm and 6.22 ppm, bottom) spectra of **9** in  $\text{CDCl}_3$ .



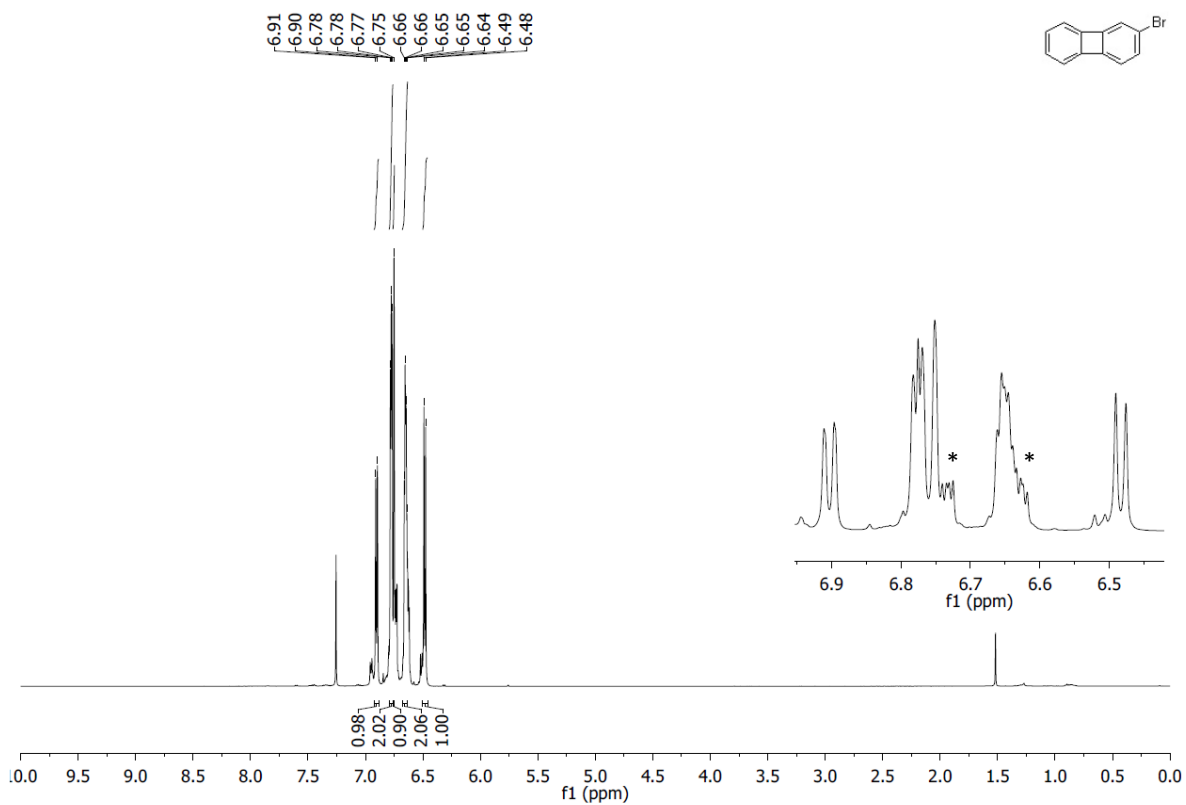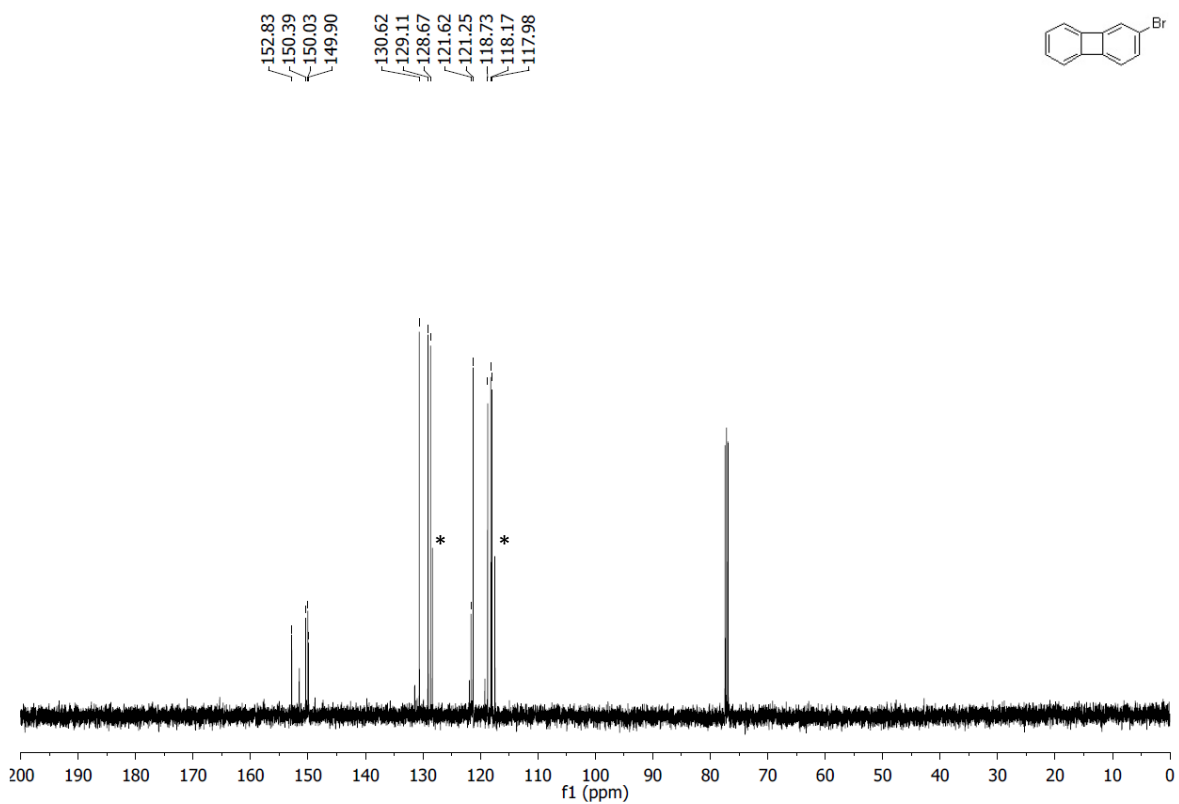

**Figure S31:**  $^1\text{H-NMR}$  (500 MHz, top) and  $^{13}\text{C}\{^1\text{H}\}$ -NMR (126 MHz, bottom) spectra of **10** in  $\text{CDCl}_3$ . Impurity: \* **2**.

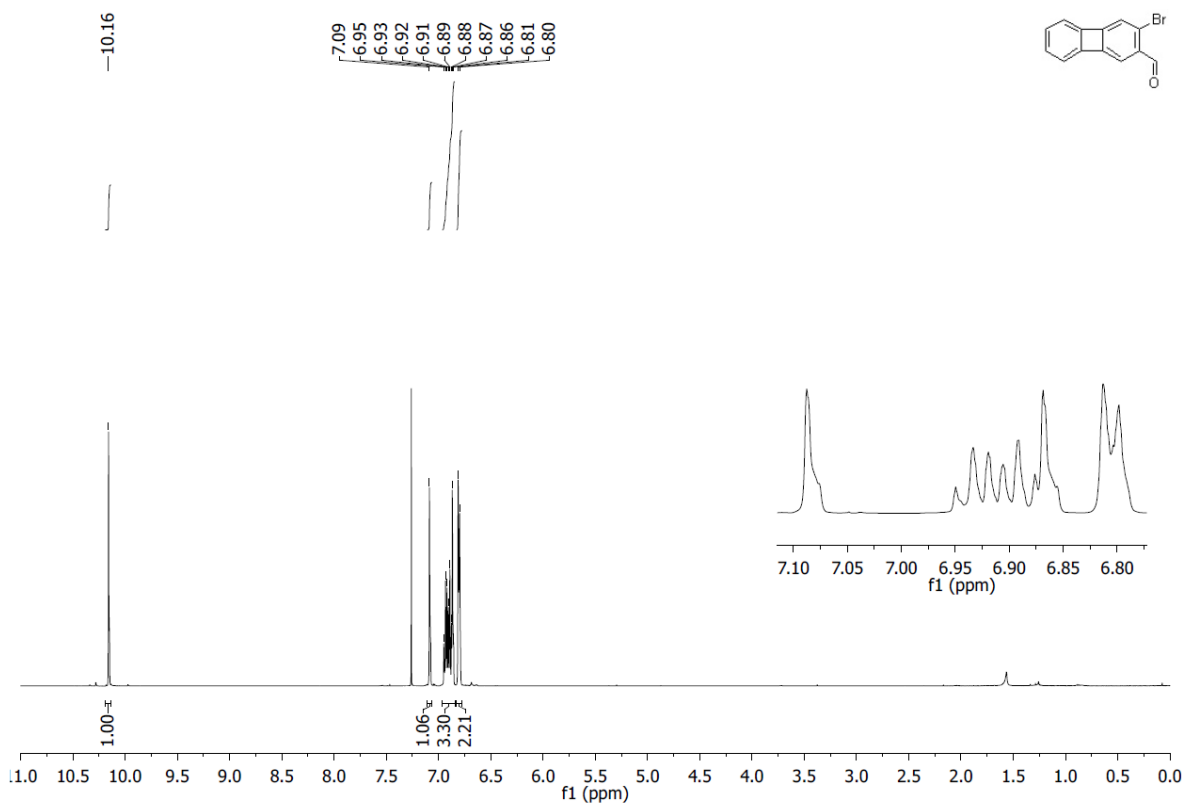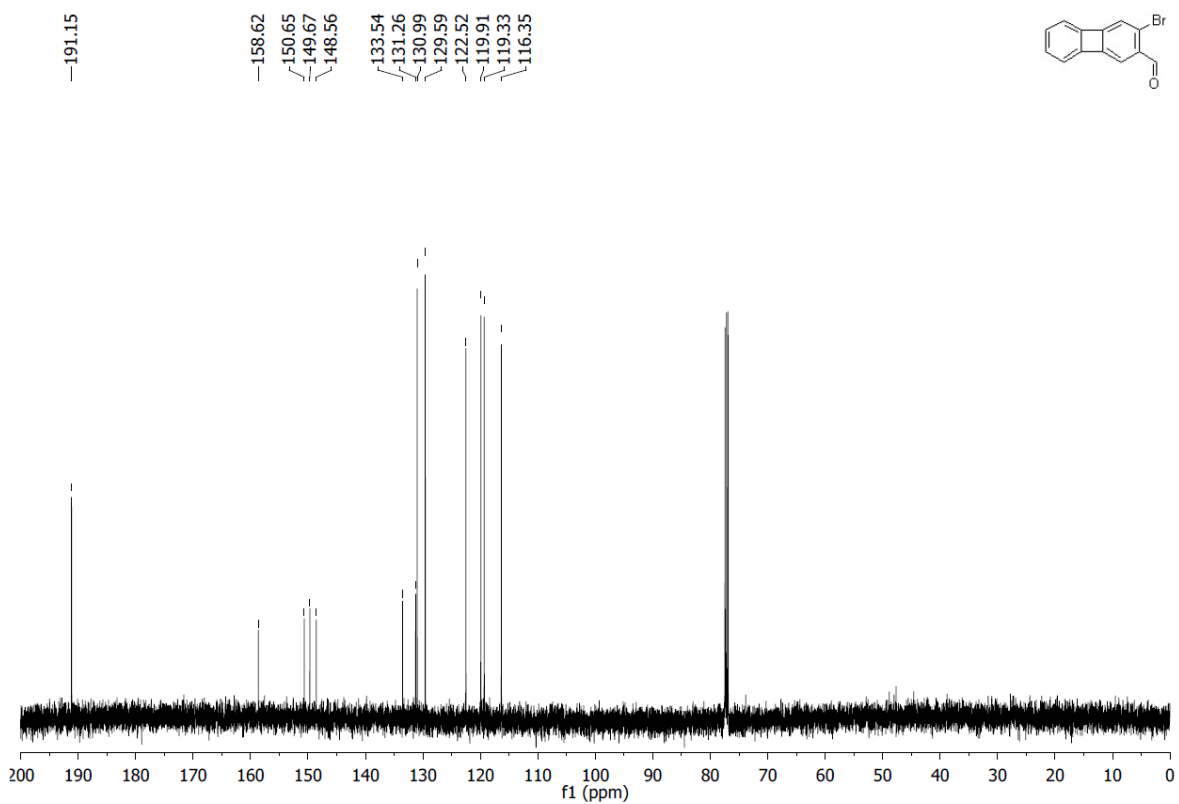

**Figure S32:**  $^1\text{H-NMR}$  (500 MHz, top) and  $^{13}\text{C}\{^1\text{H}\}$ -NMR (126 MHz, bottom) spectra of **11** in  $\text{CDCl}_3$ .

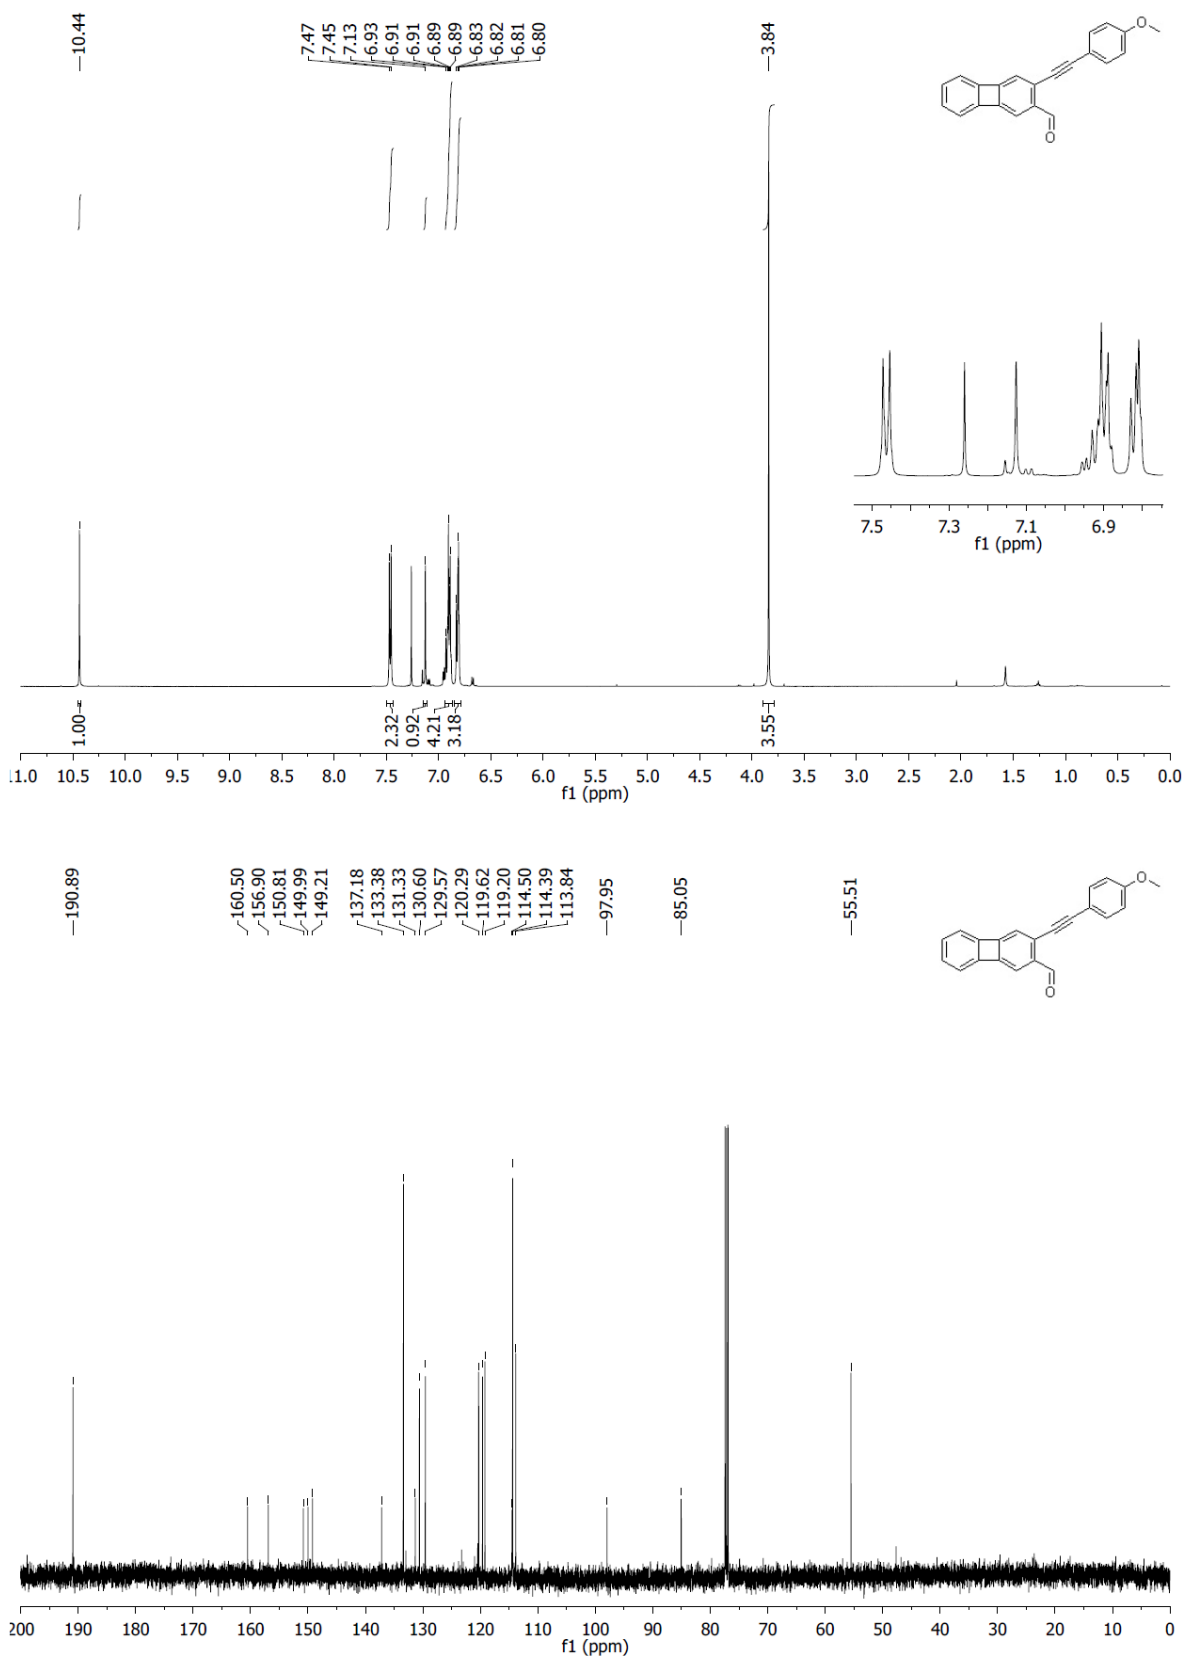

**Figure S33:** <sup>1</sup>H-NMR (500 MHz, top) and <sup>13</sup>C{<sup>1</sup>H}-NMR (126 MHz, bottom) spectra of **12** in CDCl<sub>3</sub>.

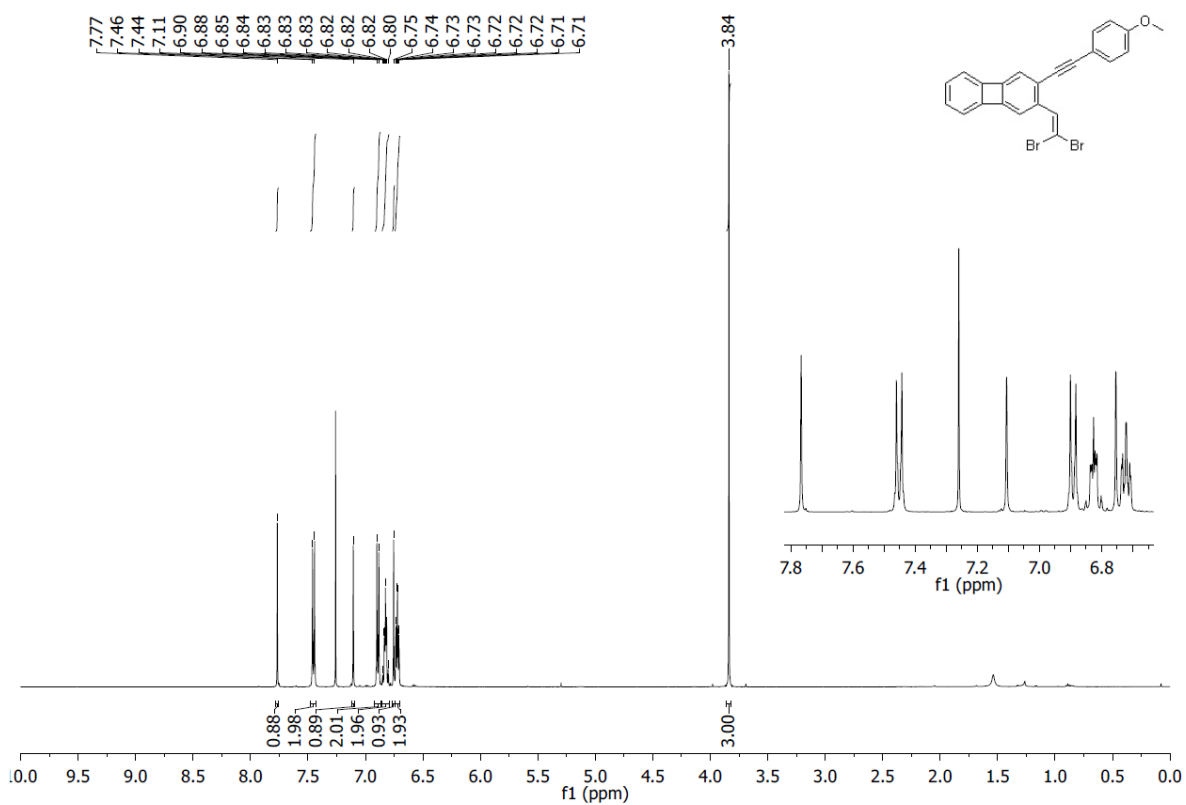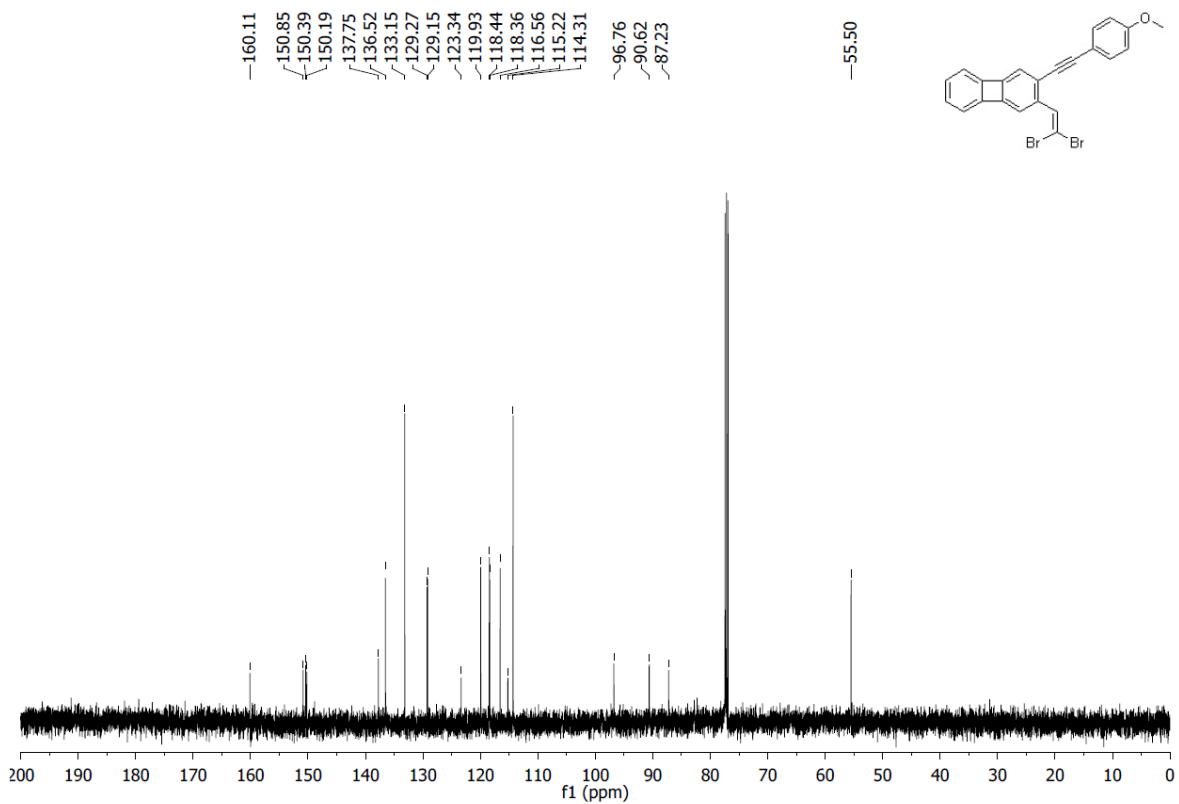

**Figure S34:**  $^1\text{H-NMR}$  (500 MHz, top) and  $^{13}\text{C}\{^1\text{H}\}$ -NMR (126 MHz, bottom) spectra of **13** in  $\text{CDCl}_3$ .

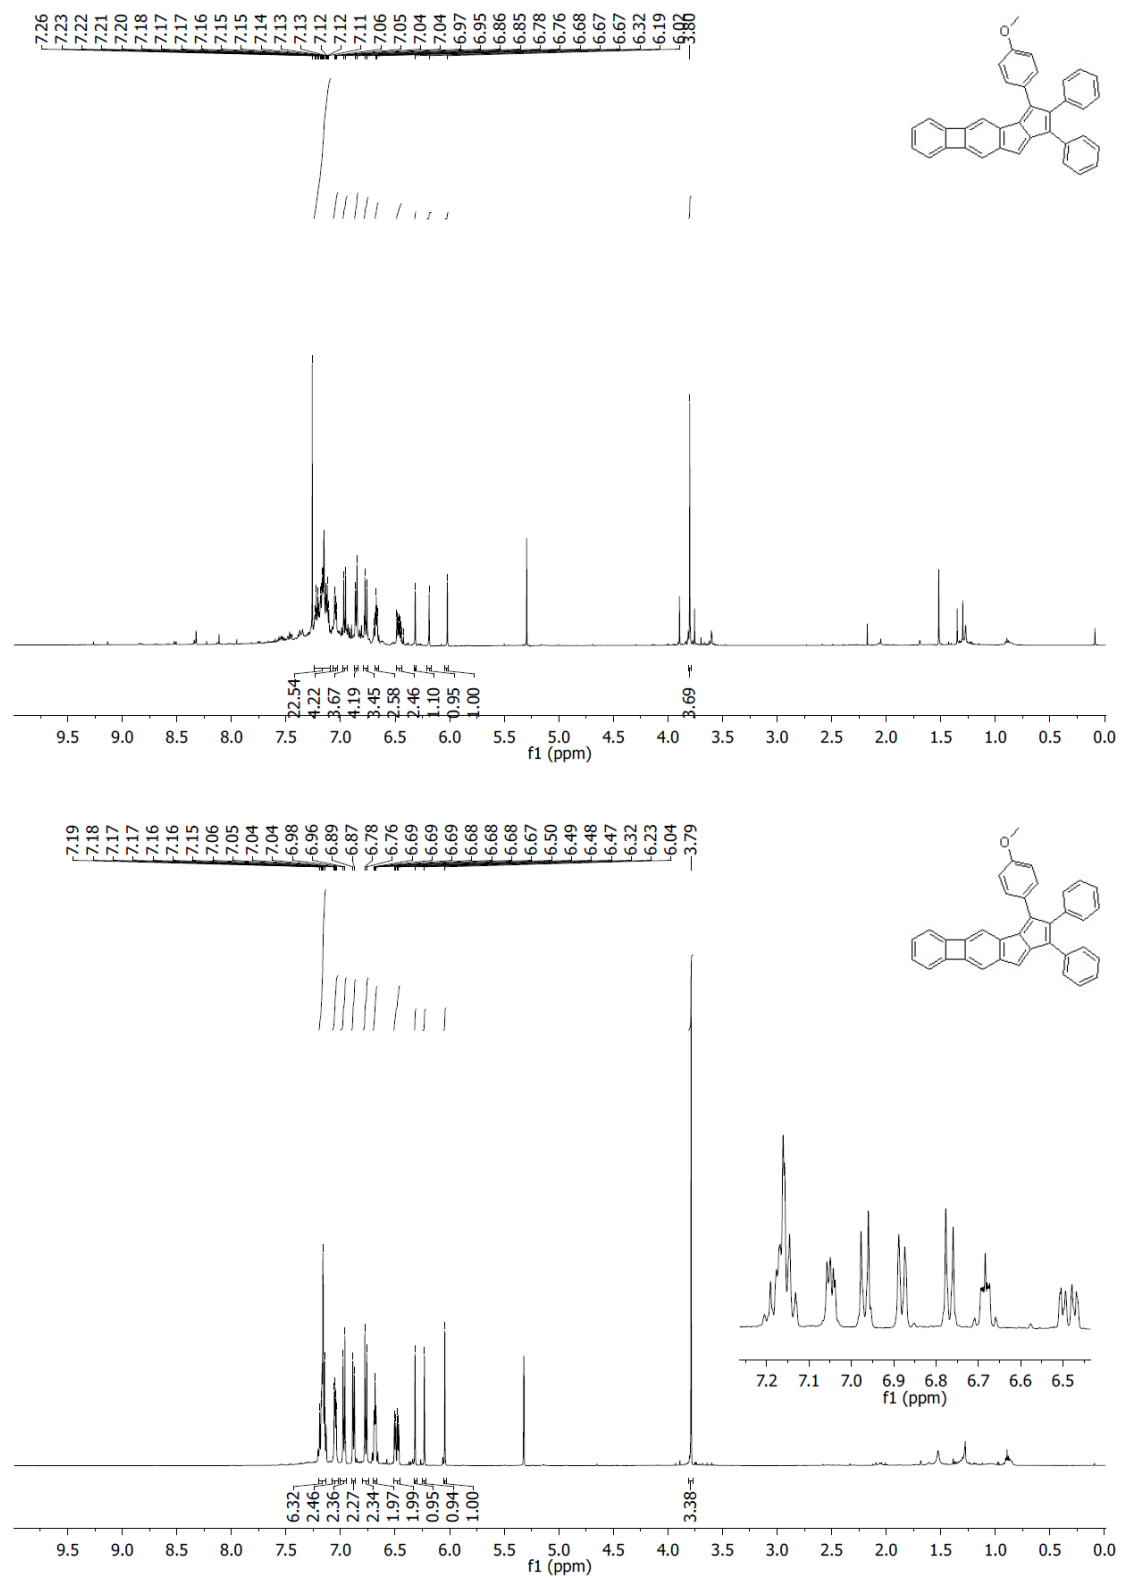

**Figure S35:** <sup>1</sup>H-NMR (500 MHz) in CDCl<sub>3</sub> (top) and <sup>1</sup>H-NMR (500 MHz) in CD<sub>2</sub>Cl<sub>2</sub> (bottom) spectra of **14**. (Note that the spectrum in CDCl<sub>3</sub> shows the degradation of the product under slightly acidic conditions.)

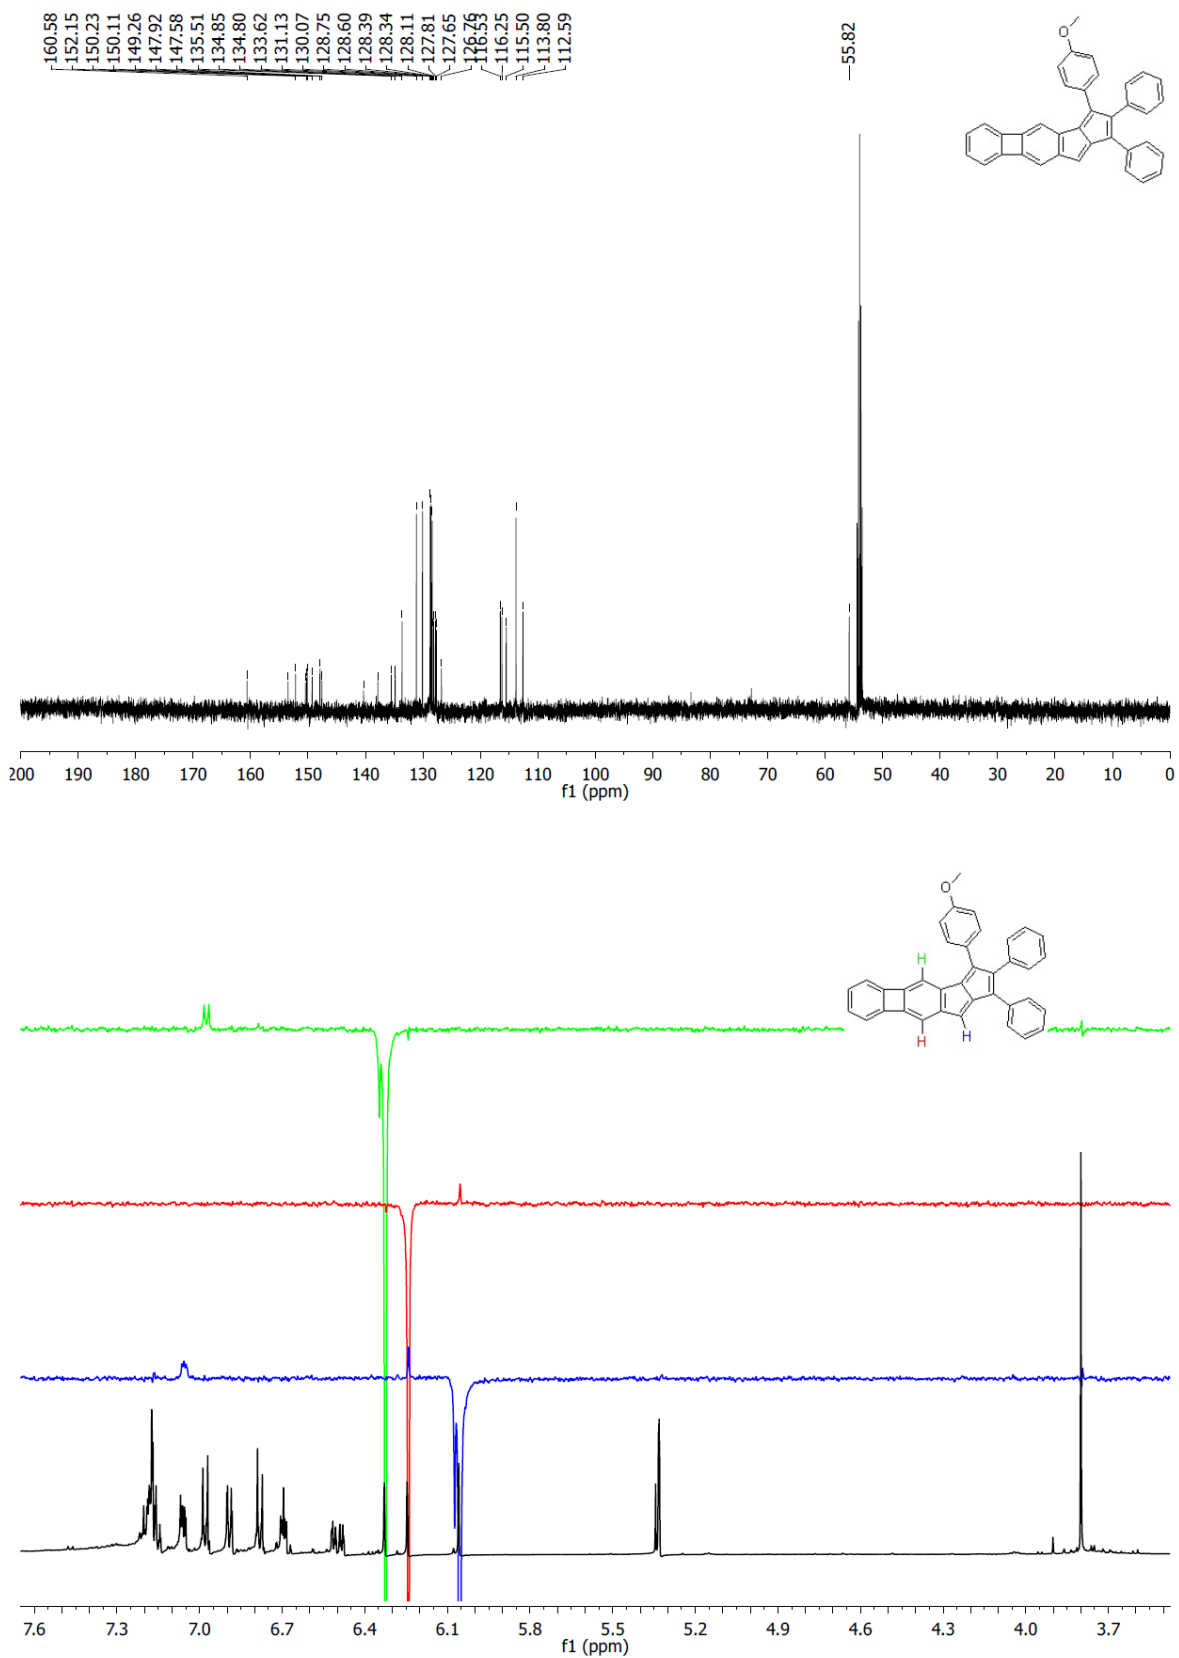

**Figure S36:** <sup>13</sup>C-NMR (126 MHz, top) and 1D-NOESY (at 6.33 ppm, 6.25 ppm and 6.06 ppm, bottom) spectra of **14** in CDCl<sub>3</sub>.

## S7 References

1. CrystalClear SM 1.4.0 Rigaku/MSI Inc., **2008**.
2. NUMABS: Higashi, T. (**1998**), rev. **2002**. (Rigaku/MSI Inc.)
3. Sheldrick, G. M. A Short History of *SHELX*. *Acta Cryst.* **2008**, *A64*, 112–122.
4. Sheldrick, G. M. Crystal Structure Refinement with *SHELXL*. *Acta Cryst.* **2015**, *C71*, 3–8.
5. Burla, M. C.; Caliandro, R.; Carrozzini, B.; Cascarano, G. L.; Cuocci, C.; Giacovazzo, C.; Mallamo, M.; Mazzone A.; Polidori, G. Crystal Structure Determination and Refinement via *SIR2014*. *J. Appl. Crystallogr.* **2015**, *48*, 306–309.
6. Spek, A. L. Structure Validation in Chemical Crystallography. *Acta Cryst.* **2009**, *D65*, 148–155.
7. Macrae, C. F.; Edgington, P. R.; McCabe, P.; Pidcock, E.; Shields, G. P.; Taylor, R.; Towler, M.; van de Streek, J. *Mercury: Visualization and Analysis of Crystal Structures*. *J. Appl. Cryst.* **2006**, *39*, 453–457.
8. Gaussian 16, Revision B.01, Frisch, M. J.; Trucks, G. W.; Schlegel, H. B.; Scuseria, G. E.; Robb, M. A.; Cheeseman, J. R.; Scalmani, G.; Barone, V.; Petersson, G. A.; Nakatsuji, H.; Li, X.; Caricato, M.; Marenich, A. V.; Bloino, J.; Janesko, B. G.; Gomperts, R.; Mennucci, B.; Hratchian, H. P.; Ortiz, J. V.; Izmaylov, A. F.; Sonnenberg, J. L.; Williams-Young, D.; Ding, F.; Lipparini, F.; Egidi, F.; Goings, J.; Peng, B.; Petrone, A.; Henderson, T.; Ranasinghe, D.; Zakrzewski, V. G.; Gao, J.; Rega, N.; Zheng, G.; Liang, W.; Hada, M.; Ehara, M.; Toyota, K.; Fukuda, R.; Hasegawa, J.; Ishida, M.; Nakajima, T.; Honda, Y.; Kitao, O.; Nakai, H.; Vreven, T.; Throssell, K.; Montgomery, J. A., Jr.; Peralta, J. E.; Ogliaro, F.; Bearpark, M. J.; Heyd, J. J.; Brothers, E. N.; Kudin, K. N.; Staroverov, V. N.; Keith, T. A.; Kobayashi, R.; Normand, J.; Raghavachari, K.; Rendell, A. P.; Burant, J. C.; Iyengar, S. S.; Tomasi, J.; Cossi, M.; Millam, J. M.; Klene, M.; Adamo, C.; Cammi, R.; Ochterski, J. W.; Martin, R. L.; Morokuma, K.; Farkas, O.; Foresman, J. B.; Fox, D. J. Gaussian, Inc., Wallingford CT, **2016**.
9. Stephens, P. J.; Devlin, F. J.; Chabalowski, C. F.; Frisch, M. J. Ab Initio Calculation of Vibrational Absorption and Circular Dichroism Spectra Using Density Functional Force Fields *J. Phys. Chem.* **1994**, *98*, 11623–11627.
10. Krishnan, R.; Binkley, K. S.; Seeger, R.; Pople, J. A. Self-Consistent Molecular Orbital Methods. XX. A Basis Set for Correlated Wave Functions. *J. Chem. Phys.* **1980**, *72*, 650–654.

11. Herges, R.; Geuenich, D. Delocalization of Electrons in Molecules. *J. Phys. Chem. A* **2001**, *105*, 3214–3220.
12. Geuenich, D.; Hess, K.; Köhler F.; Herges, R. Anisotropy of the Induced Current Density (ACID), a General Method to Quantify and Visualize Electronic Delocalization. *Chem. Rev.* **2005**, *105*, 3758–3772.
13. a) Gershoni-Poranne, R.; Stanger, A. The NICS-XY-Scan: Identification of Local and Global Ring Currents in Multi-Ring Systems. *Chem. Eur. J.* **2014**, *20*, 5673–5688; b) Stanger, A. Obtaining Relative Induced Ring Currents Quantitatively from NICS. *J. Org. Chem.* **2010**, *75*, 2281–2288; c) Stanger, A. Nucleus-Independent Chemical Shifts (NICS): Distance Dependence and Revised Criteria for Aromaticity and Antiaromaticity. *J. Org. Chem.* **2006**, *71*, 883–893.
14. Stanger, A.; Rahalkar, A. Aroma, [http://schulich.technion.ac.il/Amnon\\_Stanger.htm](http://schulich.technion.ac.il/Amnon_Stanger.htm).
15. Bader, R. F. W. *Atoms in Molecules: A Quantum Theory*, Clarendon, Oxford, **1990**.
16. Matito, E.; Duran, M.; Solà, M. The Aromatic Fluctuation Index (FLU): A New Aromaticity Index Based on Electron Delocalization. *J. Chem. Phys.*, **2005**, *122*, 014109.
17. AIMAll (Version 17.11.14 B) TK Gristmill Software ([aim.tkgristmill.com](http://aim.tkgristmill.com)), Overland Park KS, USA, **2018**.
18. Jorner, K.; Feixas, F.; Ayub, R.; Lindh, R.; Solà, M.; Ottosson, H. Analysis of a Compound Class with Triplet States Stabilized by Potentially Baird Aromatic [10]Annulenylic Dicationic Rings. *Chem. Eur. J.* **2016**, *22*, 2793–2800.
19. Matito, E. ESI-3D: Electron Sharing Indexes Program for 3D Molecular Space Partitioning, Institute of Computational Chemistry and Catalysis, Girona, Catalonia, Spain, **2006**, <https://ematito.webs.com/programs.htm>.
20. Kruszewski, J.; Krygowski, T. M. Definition of Aromaticity Basing on the Harmonic Oscillator Model. *Tetrahedron Lett.* **1972**, *13*, 3839–3842.
21. Krygowski, T. M. Crystallographic Studies of Inter- and Intramolecular Interactions Reflected in Aromatic Character of Pi-Electron Systems. *J. Chem. Inf. Model.*, **1993**, *33*, 70–78.
